# Supplementary material for: Aberrant GATA2 Activation in Pediatric B-Cell Acute Lymphoblastic Leukemia
Source: Front Pediatr. 2022 Jan 11;9:795529. doi: 10.3389/fped.2021.795529 (PMC8787225; doi:10.3389/fped.2021.795529)
Supplement: Supplementary file 5 [file Data_Sheet_1.xlsx]

## Sheet: STable 1 cohort
Supplementary Table 1. Cohort information of 584 B-ALLs in differentially expressed gene analysis.
SampleID	Subtype	GATA2 Condition	GATA2 FPKM	Library
SJBALL020882_D1	PHL	Outlier	29.0669	PolyA
SJPHALL021_D	PH	Outlier	20.6339	PolyA
SJBALL041768_D1	HYPER	Outlier	3.9165	Total
SJBALL016299_D1	HYPER	Outlier	2.7166	Total
SJBALL016232_D1	HYPER	Outlier	4.8596	Total
SJBALL013335_D1	HYPER	Outlier	2.5117	PolyA
SJBALL021023_D1	HYPER	Outlier	4.1697	PolyA
SJETV074_D	ETV	Outlier	19.5742	PolyA
SJETV079_D	ETV	Outlier	19.9353	PolyA
SJBALL021549_D1	MLL	Outlier	52.8415	PolyA
SJINF066_D	MLL	Outlier	38.5088	PolyA
SJERG002_D	DUX4	Outlier	3.7944	PolyA
SJHYPO018_D	HYPO	Outlier	8.8106	PolyA
SJBALL030370_D1	PHL	Normal	0.2362	Total
SJBALL030415_D1	PHL	Normal	0.6579	Total
SJBALL030542_D1	PHL	Normal	0.1356	Total
SJBALL030576_D1	PHL	Normal	0.1453	Total
SJBALL030653_D1	PHL	Normal	0.0345	Total
SJBALL030718_D1	PHL	Normal	4.9279	Total
SJBALL030675_D1	PHL	Normal	0.2605	Total
SJBALL030735_D1	PHL	Normal	0.3981	Total
SJBALL030888_D1	PHL	Normal	0.4632	Total
SJBALL030976_D1	PHL	Normal	0.1803	Total
SJBALL030923_D1	PHL	Normal	0.0763	Total
SJBALL030937_D1	PHL	Normal	0.0756	Total
SJBALL030999_D1	PHL	Normal	0.4999	Total
SJBALL031044_D1	PHL	Normal	0.0559	Total
SJBALL031267_D1	PHL	Normal	0.4633	Total
SJBALL031342_D1	PHL	Normal	0.6692	Total
SJBALL204_D	PHL	Normal	0.0821	Total
SJDOWN013_D	PHL	Normal	0.0566	Total
SJBALL030080_D1	PHL	Normal	0.7186	Total
SJBALL030104_D1	PHL	Normal	1.0118	Total
SJBALL030036_D1	PHL	Normal	0.3698	Total
SJBALL030054_D1	PHL	Normal	0.3174	Total
SJBALL030216_D1	PHL	Normal	0.2666	Total
SJBALL030254_D1	PHL	Normal	0.1821	Total
SJBALL010_D	PHL	Normal	0.1034	PolyA
SJBALL020013_D1	PHL	Normal	0.1572	PolyA
SJBALL020069_D1	PHL	Normal	0.1149	PolyA
SJBALL020073_D1	PHL	Normal	0.2335	PolyA
SJBALL020077_D1	PHL	Normal	0.1755	PolyA
SJBALL020081_D1	PHL	Normal	0.0544	PolyA
SJBALL020084_D1	PHL	Normal	1.2171	PolyA
SJBALL020091_D1	PHL	Normal	0.622	PolyA
SJBALL020100_D1	PHL	Normal	0.2216	PolyA
SJBALL020138_D1	PHL	Normal	0.2937	PolyA
SJBALL020145_D1	PHL	Normal	0.2039	PolyA
SJBALL020579_D1	PHL	Normal	0.3625	PolyA
SJBALL020589_D1	PHL	Normal	0.7217	PolyA
SJBALL020625_D1	PHL	Normal	0.2311	PolyA
SJBALL020649_D1	PHL	Normal	0.4867	PolyA
SJBALL020704_D1	PHL	Normal	2.232	PolyA
SJBALL020765_D1	PHL	Normal	0.7673	PolyA
SJBALL020832_D1	PHL	Normal	0.2834	PolyA
SJBALL020877_D1	PHL	Normal	0.1187	PolyA
SJBALL020941_D1	PHL	Normal	3.2954	PolyA
SJBALL020966_D1	PHL	Normal	0.2061	PolyA
SJBALL020980_D1	PHL	Normal	0.5336	PolyA
SJBALL020994_D1	PHL	Normal	0.1782	PolyA
SJBALL021018_D1	PHL	Normal	0.571	PolyA
SJBALL021083_D1	PHL	Normal	1.7672	PolyA
SJBALL021728_D1	PHL	Normal	0.1291	PolyA
SJBALL021748_D1	PHL	Normal	0.0325	PolyA
SJBALL021780_D1	PHL	Normal	0.8206	PolyA
SJBALL021800_D1	PHL	Normal	0.3998	PolyA
SJBALL021807_D1	PHL	Normal	0.224	PolyA
SJBALL021814_D1	PHL	Normal	0.2137	PolyA
SJBALL021856_D1	PHL	Normal	0.2461	PolyA
SJBALL021866_D1	PHL	Normal	0.091	PolyA
SJBALL022244_D1	PHL	Normal	0.5224	PolyA
SJBALL022246_D1	PHL	Normal	1.3133	PolyA
SJBALL022245_D1	PHL	Normal	0.5075	PolyA
SJBALL231_D	PHL	Normal	0.2105	PolyA
SJBALL021080_D1	PHL	Normal	0.3963	Total
SJBALL262_D	PHL	Normal	4.9689	PolyA
SJBALL267_D	PHL	Normal	0.2585	PolyA
SJBALL263_D	PHL	Normal	0.3175	PolyA
SJBALL030414_D1	PH	Normal	0.8528	Total
SJBALL030475_D1	PH	Normal	0.0899	Total
SJBALL030652_D1	PH	Normal	0.2364	Total
SJBALL030734_D1	PH	Normal	0.3894	Total
SJBALL030889_D1	PH	Normal	0.585	Total
SJBALL031128_D1	PH	Normal	0.9035	Total
SJPHALL003_D	PH	Normal	0.0863	Total
SJBALL030108_D1	PH	Normal	1.0356	Total
SJBALL030344_D1	PH	Normal	0.4403	Total
SJBALL020998_D1	PH	Normal	0.2925	PolyA
SJBALL021059_D1	PH	Normal	1.6147	PolyA
SJBALL021737_D1	PH	Normal	0.6043	PolyA
SJBALL021145_D1	PH	Normal	0.7971	PolyA
SJBALL021146_D1	PH	Normal	1.0933	PolyA
SJHYPO121_D	PH	Normal	0.0723	PolyA
SJPHALL005_D	PH	Normal	0.1834	Total
SJPHALL006_D	PH	Normal	0.5426	PolyA
SJPHALL004_D	PH	Normal	1.0126	PolyA
SJPHALL010_D	PH	Normal	12.079	PolyA
SJPHALL008_D	PH	Normal	0.1302	PolyA
SJPHALL009_D	PH	Normal	0.256	PolyA
SJPHALL007_D	PH	Normal	3.187	PolyA
SJPHALL012_D	PH	Normal	1.2837	PolyA
SJPHALL015_D	PH	Normal	0.7014	PolyA
SJPHALL013_D	PH	Normal	0.519	PolyA
SJPHALL020033_D1	PH	Normal	0.1621	PolyA
SJPHALL020037_D1	PH	Normal	10.8712	PolyA
SJPHALL020034_D1	PH	Normal	0.925	PolyA
SJPHALL020036_D1	PH	Normal	0.6202	PolyA
SJPHALL020035_D1	PH	Normal	9.3294	PolyA
SJPHALL020038_D1	PH	Normal	0.602	PolyA
SJPHALL020043_D1	PH	Normal	0.1246	PolyA
SJPHALL020040_D1	PH	Normal	0.3004	PolyA
SJPHALL020044_D1	PH	Normal	5.6537	PolyA
SJPHALL020046_D1	PH	Normal	12.8111	PolyA
SJPHALL020_D	PH	Normal	4.9177	PolyA
SJPHALL020047_D1	PH	Normal	1.4298	PolyA
SJPHALL026_D	PH	Normal	0.1376	PolyA
SJPHALL029_D	PH	Normal	0.0843	PolyA
SJBALL030351_D1	HYPER	Normal	0.0644	Total
SJBALL030354_D1	HYPER	Normal	0.3539	Total
SJBALL030358_D1	HYPER	Normal	0.2009	Total
SJBALL030349_D1	HYPER	Normal	0.0979	Total
SJBALL030362_D1	HYPER	Normal	0.2393	Total
SJBALL030384_D1	HYPER	Normal	0.1399	Total
SJBALL030413_D1	HYPER	Normal	0.4804	Total
SJBALL030432_D1	HYPER	Normal	1.0199	Total
SJBALL030491_D1	HYPER	Normal	0.0496	Total
SJBALL030515_D1	HYPER	Normal	0.2244	Total
SJBALL030516_D1	HYPER	Normal	0.2664	Total
SJBALL030533_D1	HYPER	Normal	0.1792	Total
SJBALL030574_D1	HYPER	Normal	0.1326	Total
SJBALL030607_D1	HYPER	Normal	0.0203	Total
SJBALL030618_D1	HYPER	Normal	0.0696	Total
SJBALL030639_D1	HYPER	Normal	0.1896	Total
SJBALL030644_D1	HYPER	Normal	0.0149	Total
SJBALL030709_D1	HYPER	Normal	0.0169	Total
SJBALL030719_D1	HYPER	Normal	0.4891	Total
SJBALL030755_D2	HYPER	Normal	0.0897	Total
SJBALL030756_D1	HYPER	Normal	0.4112	Total
SJBALL030832_D1	HYPER	Normal	0.1631	Total
SJBALL030772_D1	HYPER	Normal	0.163	Total
SJBALL030840_D2	HYPER	Normal	0.7934	Total
SJBALL030821_D1	HYPER	Normal	0.0542	Total
SJBALL030879_D1	HYPER	Normal	0.6121	Total
SJBALL030927_D1	HYPER	Normal	0.0138	Total
SJBALL030977_D1	HYPER	Normal	0.1001	Total
SJBALL030984_D1	HYPER	Normal	0.0134	Total
SJBALL030946_D1	HYPER	Normal	0.009	Total
SJBALL030994_D1	HYPER	Normal	0.0532	Total
SJBALL031021_D1	HYPER	Normal	0.7012	Total
SJBALL031058_D1	HYPER	Normal	0.3368	Total
SJBALL031094_D1	HYPER	Normal	0.1044	Total
SJBALL031099_D1	HYPER	Normal	0.0801	Total
SJBALL031073_D1	HYPER	Normal	0.1005	Total
SJBALL031074_D1	HYPER	Normal	0.0134	Total
SJBALL031123_D1	HYPER	Normal	0.1393	Total
SJHYPER006_D	HYPER	Normal	0.0695	Total
SJHYPER011_D	HYPER	Normal	0.0635	Total
SJBALL030090_D1	HYPER	Normal	0.0778	Total
SJBALL030103_D1	HYPER	Normal	0.3332	Total
SJBALL030126_D1	HYPER	Normal	0.0538	Total
SJBALL030143_D1	HYPER	Normal	0.3696	Total
SJAML030330_D1	HYPER	Normal	0.11	Total
SJBALL030161_D1	HYPER	Normal	0.7364	Total
SJBALL030040_D1	HYPER	Normal	0.0789	Total
SJBALL030042_D1	HYPER	Normal	0.0566	Total
SJBALL030190_D1	HYPER	Normal	0.1827	Total
SJBALL030221_D1	HYPER	Normal	1.0908	Total
SJBALL030258_D1	HYPER	Normal	0.2829	Total
SJBALL030265_D1	HYPER	Normal	0.8274	Total
SJBALL030266_D1	HYPER	Normal	0.1797	Total
SJBALL030267_D1	HYPER	Normal	0.3177	Total
SJBALL030270_D1	HYPER	Normal	0.8873	Total
SJBALL030271_D1	HYPER	Normal	0.2611	Total
SJBALL030276_D1	HYPER	Normal	0.2482	Total
SJBALL030282_D1	HYPER	Normal	0.2682	Total
SJBALL030285_D1	HYPER	Normal	0.0233	Total
SJBALL030290_D1	HYPER	Normal	0.0918	Total
SJBALL030311_D1	HYPER	Normal	0.0769	Total
SJBALL030318_D1	HYPER	Normal	0.139	Total
SJBALL020106_D1	HYPER	Normal	0.1815	PolyA
SJBALL020113_D1	HYPER	Normal	0.1301	PolyA
SJBALL020151_D1	HYPER	Normal	0.0552	PolyA
SJBALL020953_D1	HYPER	Normal	0.1231	PolyA
SJBALL020993_D1	HYPER	Normal	0.3012	PolyA
SJBALL021021_D1	HYPER	Normal	0.3423	PolyA
SJBALL021530_D1	HYPER	Normal	0.1638	Total
SJBALL021790_D1	HYPER	Normal	0.0787	PolyA
SJBALL021803_D1	HYPER	Normal	0.0341	PolyA
SJBALL021820_D1	HYPER	Normal	0.1558	PolyA
SJE2A056_D	HYPER	Normal	0.0892	PolyA
SJETV036_D	HYPER	Normal	0.3014	PolyA
SJINF067_D	HYPER	Normal	0.4395	PolyA
SJALL014954_D1	HYPER	Normal	0.5396	Total
SJALL015619_D1	HYPER	Normal	0.5717	Total
SJALL015927_D1	HYPER	Normal	0.0679	Total
SJALL015947_D1	HYPER	Normal	0.1466	Total
SJALL015953_D1	HYPER	Normal	0.0205	Total
SJALL015946_D1	HYPER	Normal	0.6208	Total
SJALL015960_D1	HYPER	Normal	0.6404	Total
SJALL015969_D1	HYPER	Normal	0.3234	Total
SJALL015967_D1	HYPER	Normal	0.1725	Total
SJALL015972_D1	HYPER	Normal	0.0344	Total
SJALL015988_D1	HYPER	Normal	0.2616	Total
SJALL016654_D1	HYPER	Normal	0.0666	Total
SJALL016657_D1	HYPER	Normal	0.4058	Total
SJALL015970_D1	HYPER	Normal	0.1785	Total
SJBALL002220_D1	HYPER	Normal	0.1067	Total
SJALL016675_D1	HYPER	Normal	0.1074	Total
SJALL050876_D1	HYPER	Normal	0.1215	Total
SJALL050834_D1	HYPER	Normal	0.9572	Total
SJBALL013327_D1	HYPER	Normal	0.2083	Total
SJBALL013330_D1	HYPER	Normal	0.1779	PolyA
SJALL050835_D1	HYPER	Normal	0.6911	Total
SJALL050840_D1	HYPER	Normal	0.0859	Total
SJALL050838_D1	HYPER	Normal	0.2015	Total
SJBALL013336_D1	HYPER	Normal	1.1373	Total
SJBALL013338_D1	HYPER	Normal	0.6199	PolyA
SJALL050844_D1	HYPER	Normal	0.1841	Total
SJALL050845_D1	HYPER	Normal	0.2254	Total
SJALL050843_D1	HYPER	Normal	0.1122	Total
SJALL050842_D1	HYPER	Normal	0.5189	Total
SJBALL013348_D1	HYPER	Normal	0.3826	PolyA
SJALL050846_D1	HYPER	Normal	0.33	Total
SJBALL013353_D1	HYPER	Normal	0.8514	PolyA
SJBALL013356_D1	HYPER	Normal	0.5119	PolyA
SJALL050851_D1	HYPER	Normal	0.2747	Total
SJALL050850_D1	HYPER	Normal	0.8693	Total
SJBALL013362_D1	HYPER	Normal	1.3288	PolyA
SJALL050856_D1	HYPER	Normal	0.7554	Total
SJALL050858_D1	HYPER	Normal	0.035	Total
SJBALL013363_D1	HYPER	Normal	0.7176	PolyA
SJALL050855_D1	HYPER	Normal	0.027	Total
SJALL050861_D1	HYPER	Normal	0.1355	Total
SJBALL013374_D1	HYPER	Normal	0.9094	PolyA
SJALL050866_D1	HYPER	Normal	0.2241	Total
SJALL050867_D1	HYPER	Normal	0.1747	Total
SJALL050833_D1	HYPER	Normal	0.5415	Total
SJALL050836_D1	HYPER	Normal	0.5534	Total
SJALL050828_D1	HYPER	Normal	0.1324	Total
SJALL050869_D1	HYPER	Normal	1.2305	Total
SJALL050873_D1	HYPER	Normal	0.0081	Total
SJALL050883_D1	HYPER	Normal	1.4111	Total
SJALL050879_D1	HYPER	Normal	0.1627	Total
SJALL050881_D1	HYPER	Normal	0.3044	Total
SJALL050874_D1	HYPER	Normal	0.1753	Total
SJBALL001608_D1	HYPER	Normal	0.377	Total
SJALL050885_D1	HYPER	Normal	0.315	Total
SJBALL015200_D1	HYPER	Normal	0.0136	Total
SJBALL016220_D1	HYPER	Normal	0.327	Total
SJBALL016218_D1	HYPER	Normal	0.3676	Total
SJBALL016224_D1	HYPER	Normal	0.0235	Total
SJBALL016227_D1	HYPER	Normal	0.0134	Total
SJBALL016234_D1	HYPER	Normal	0.3137	Total
SJBALL016237_D1	HYPER	Normal	0.6772	Total
SJBALL016238_D1	HYPER	Normal	0.168	Total
SJBALL016241_D1	HYPER	Normal	0.093	Total
SJBALL016245_D1	HYPER	Normal	0.1878	Total
SJBALL016253_D1	HYPER	Normal	0.2903	Total
SJBALL016255_D1	HYPER	Normal	0.5115	Total
SJBALL016254_D1	HYPER	Normal	0.5536	Total
SJBALL016263_D1	HYPER	Normal	0.5101	Total
SJBALL016269_D1	HYPER	Normal	0.0541	Total
SJBALL016277_D1	HYPER	Normal	1.1982	Total
SJBALL016276_D1	HYPER	Normal	0.1026	Total
SJBALL020632_D1	HYPER	Normal	0.0924	PolyA
SJBALL020641_D1	HYPER	Normal	0.1491	PolyA
SJBALL016281_D1	HYPER	Normal	0.2964	Total
SJBALL020656_D1	HYPER	Normal	0.0577	PolyA
SJBALL020647_D1	HYPER	Normal	0.2359	PolyA
SJBALL020652_D1	HYPER	Normal	0.1191	PolyA
SJBALL020657_D1	HYPER	Normal	0.0778	PolyA
SJBALL016247_D1	HYPER	Normal	0.1904	Total
SJBALL020668_D1	HYPER	Normal	0.197	PolyA
SJBALL020665_D1	HYPER	Normal	0.9565	PolyA
SJBALL016288_D1	HYPER	Normal	0.1301	Total
SJBALL020672_D1	HYPER	Normal	0.235	PolyA
SJBALL016256_D1	HYPER	Normal	0.4334	Total
SJBALL016298_D1	HYPER	Normal	0.0543	Total
SJBALL020700_D1	HYPER	Normal	0.1753	PolyA
SJBALL020702_D1	HYPER	Normal	0.3168	PolyA
SJBALL020698_D1	HYPER	Normal	0.5004	PolyA
SJBALL016302_D1	HYPER	Normal	0.5492	Total
SJBALL020015_D1	HYPER	Normal	0.3401	PolyA
SJBALL016307_D1	HYPER	Normal	0.5263	Total
SJBALL020718_D1	HYPER	Normal	0.1985	PolyA
SJBALL020518_D1	HYPER	Normal	1.0789	PolyA
SJBALL020724_D1	HYPER	Normal	0.9177	PolyA
SJBALL020600_D1	HYPER	Normal	2.1741	PolyA
SJBALL020601_D1	HYPER	Normal	0.2713	PolyA
SJBALL020592_D1	HYPER	Normal	1.4971	PolyA
SJBALL020614_D1	HYPER	Normal	0.1519	PolyA
SJBALL020727_D1	HYPER	Normal	0.4281	PolyA
SJBALL020735_D1	HYPER	Normal	0.0322	PolyA
SJBALL020611_D1	HYPER	Normal	1.1917	PolyA
SJBALL020786_D1	HYPER	Normal	0.3369	PolyA
SJBALL020722_D1	HYPER	Normal	0.2023	PolyA
SJBALL020634_D1	HYPER	Normal	0.3992	PolyA
SJBALL020803_D1	HYPER	Normal	0.896	PolyA
SJBALL020800_D1	HYPER	Normal	0.1814	PolyA
SJBALL020638_D1	HYPER	Normal	0.2047	PolyA
SJBALL020808_D1	HYPER	Normal	0.1198	PolyA
SJBALL020815_D1	HYPER	Normal	0.1723	PolyA
SJBALL020865_D1	HYPER	Normal	0.0539	PolyA
SJBALL020852_D1	HYPER	Normal	0.2268	Total
SJBALL020873_D1	HYPER	Normal	0.0326	PolyA
SJBALL020871_D1	HYPER	Normal	0.075	PolyA
SJBALL020875_D1	HYPER	Normal	0.1176	PolyA
SJBALL020893_D1	HYPER	Normal	0.2747	PolyA
SJBALL020894_D1	HYPER	Normal	1.4237	PolyA
SJBALL020920_D1	HYPER	Normal	0.3061	PolyA
SJBALL020897_D1	HYPER	Normal	0.081	PolyA
SJBALL020943_D1	HYPER	Normal	0.1392	PolyA
SJBALL020916_D1	HYPER	Normal	0.3581	PolyA
SJBALL041736_D1	HYPER	Normal	0.4249	Total
SJBALL041739_D1	HYPER	Normal	1.8891	Total
SJBALL041745_D1	HYPER	Normal	0.7598	Total
SJBALL021109_D1	HYPER	Normal	1.0457	Total
SJBALL041734_D1	HYPER	Normal	0.7487	Total
SJBALL041747_D1	HYPER	Normal	0.2772	Total
SJBALL041748_D1	HYPER	Normal	0.0238	Total
SJBALL041754_D1	HYPER	Normal	0.2359	Total
SJBALL041765_D1	HYPER	Normal	0.7	Total
SJBALL041755_D1	HYPER	Normal	0.3958	Total
SJBALL041779_D1	HYPER	Normal	0.24	Total
SJBALL041778_D1	HYPER	Normal	0.2675	Total
SJBALL041769_D1	HYPER	Normal	0.9622	Total
SJBALL041771_D1	HYPER	Normal	0.5962	Total
SJBALL022606_D1	HYPER	Normal	0.2898	PolyA
SJBALL041772_D1	HYPER	Normal	0.1313	Total
SJBALL041732_D1	HYPER	Normal	0.3593	Total
SJBALL041735_D1	HYPER	Normal	0.0633	Total
SJBALL043627_D1	HYPER	Normal	0.2569	Total
SJBALL041738_D1	HYPER	Normal	1.9215	Total
SJBALL041770_D1	HYPER	Normal	0.1637	Total
SJBALL043643_D1	HYPER	Normal	0.5494	Total
SJBALL264_D	HYPER	Normal	0.3424	PolyA
SJBALL030355_D1	ETV	Normal	0.7852	Total
SJBALL030474_D1	ETV	Normal	0.2245	Total
SJBALL030507_D1	ETV	Normal	0.326	Total
SJBALL030520_D1	ETV	Normal	0.1584	Total
SJBALL030563_D1	ETV	Normal	1.4608	Total
SJBALL030569_D1	ETV	Normal	3.7027	Total
SJBALL030541_D1	ETV	Normal	4.8036	Total
SJBALL030588_D1	ETV	Normal	0.3649	Total
SJBALL030713_D1	ETV	Normal	0.1755	Total
SJBALL030724_D1	ETV	Normal	3.5509	Total
SJBALL030685_D1	ETV	Normal	3.3624	Total
SJBALL030726_D1	ETV	Normal	0.7555	Total
SJBALL030754_D1	ETV	Normal	3.9738	Total
SJBALL030786_D1	ETV	Normal	0.3584	Total
SJBALL030816_D1	ETV	Normal	1.1877	Total
SJBALL030822_D1	ETV	Normal	0.8448	Total
SJBALL030872_D1	ETV	Normal	4.1187	Total
SJBALL030906_D1	ETV	Normal	0.4143	Total
SJBALL031006_D1	ETV	Normal	0.0958	Total
SJBALL031007_D1	ETV	Normal	1.5895	Total
SJBALL031048_D1	ETV	Normal	9.4105	Total
SJBALL031057_D1	ETV	Normal	1.7738	Total
SJBALL031122_D1	ETV	Normal	4.1853	Total
SJBALL031266_D1	ETV	Normal	0.1566	Total
SJBALL031268_D1	ETV	Normal	0.1361	Total
SJBALL031376_D1	ETV	Normal	3.5292	Total
SJBALL031393_D1	ETV	Normal	1.3967	Total
SJETV092_D	ETV	Normal	0.1147	Total
SJETV093_D	ETV	Normal	6.415	Total
SJBALL030057_D1	ETV	Normal	0.6387	Total
SJBALL030091_D1	ETV	Normal	5.8487	Total
SJBALL030132_D1	ETV	Normal	3.5703	Total
SJBALL030034_D1	ETV	Normal	2.6045	Total
SJBALL030164_D1	ETV	Normal	1.2796	Total
SJBALL030174_D1	ETV	Normal	1.446	Total
SJBALL030045_D1	ETV	Normal	1.699	Total
SJBALL030048_D1	ETV	Normal	6.3755	Total
SJBALL030207_D1	ETV	Normal	0.4237	Total
SJBALL030219_D1	ETV	Normal	1.9387	Total
SJBALL030227_D1	ETV	Normal	0.5477	Total
SJBALL030248_D1	ETV	Normal	2.125	Total
SJBALL030275_D1	ETV	Normal	2.6718	Total
SJBALL030288_D1	ETV	Normal	0.8237	Total
SJBALL030323_D1	ETV	Normal	14.5999	Total
SJBALL030325_D1	ETV	Normal	6.0625	Total
SJBALL030331_D1	ETV	Normal	1.5159	Total
SJBALL030337_D1	ETV	Normal	1.8123	Total
SJBALL030366_D1	ETV	Normal	0.7286	Total
SJETV004_D	ETV	Normal	3.8386	PolyA
SJETV003_D	ETV	Normal	3.7342	PolyA
SJETV010_D	ETV	Normal	7.6088	PolyA
SJETV022_D	ETV	Normal	0.9319	PolyA
SJETV024_D	ETV	Normal	7.6054	PolyA
SJETV025_D	ETV	Normal	7.0796	PolyA
SJETV026_D	ETV	Normal	3.2454	PolyA
SJETV027_D	ETV	Normal	0.6638	PolyA
SJETV028_D	ETV	Normal	9.6074	PolyA
SJETV032_D	ETV	Normal	0.3763	PolyA
SJETV035_D	ETV	Normal	4.3946	PolyA
SJETV039_D	ETV	Normal	5.3065	PolyA
SJETV041_D	ETV	Normal	0.1783	PolyA
SJETV043_D	ETV	Normal	7.2256	PolyA
SJETV044_D	ETV	Normal	14.7	PolyA
SJETV045_D	ETV	Normal	0.646	PolyA
SJETV046_D	ETV	Normal	4.4564	PolyA
SJETV047_D	ETV	Normal	3.8392	PolyA
SJETV059_D	ETV	Normal	6.0224	PolyA
SJETV068_D	ETV	Normal	7.1127	PolyA
SJETV069_D	ETV	Normal	11.5878	PolyA
SJETV001_D	ETV	Normal	3.548	PolyA
SJETV070_D	ETV	Normal	5.4868	PolyA
SJETV073_D	ETV	Normal	0.2624	PolyA
SJETV002_D	ETV	Normal	16.242	PolyA
SJETV075_D	ETV	Normal	0.1814	PolyA
SJETV076_D	ETV	Normal	2.03	PolyA
SJETV078_D	ETV	Normal	0.0875	PolyA
SJETV077_D	ETV	Normal	1.3019	PolyA
SJETV082_D	ETV	Normal	16.9724	PolyA
SJETV083_D	ETV	Normal	2.4049	PolyA
SJETV084_D	ETV	Normal	0.1431	PolyA
SJETV085_D	ETV	Normal	0.1501	PolyA
SJETV086_D	ETV	Normal	3.3423	PolyA
SJETV088_D	ETV	Normal	10.4451	PolyA
SJETV089_D	ETV	Normal	1.6608	PolyA
SJETV096_D	ETV	Normal	16.833	PolyA
SJETV095_D	ETV	Normal	0.1793	PolyA
SJETV098_D	ETV	Normal	0.6876	PolyA
SJETV136_D	ETV	Normal	4.4361	PolyA
SJETV190_D	ETV	Normal	3.4539	PolyA
SJETV191_D	ETV	Normal	7.0291	PolyA
SJETV195_D	ETV	Normal	3.8287	PolyA
SJBALL030499_D1	MLL	Normal	0.3435	Total
SJBALL030523_D1	MLL	Normal	0.2894	Total
SJBALL030525_D1	MLL	Normal	0.3164	Total
SJBALL030535_D1	MLL	Normal	0.1164	Total
SJBALL030865_D1	MLL	Normal	0.043	Total
SJBALL030887_D1	MLL	Normal	0.0436	Total
SJBALL031077_D1	MLL	Normal	0.2858	Total
SJBALL031079_D1	MLL	Normal	0.4598	Total
SJBALL031087_D1	MLL	Normal	0.1703	Total
SJBALL031076_D1	MLL	Normal	0.0358	Total
SJBALL031156_D1	MLL	Normal	0.0651	Total
SJBALL031157_D1	MLL	Normal	0.1504	Total
SJMLL004_D	MLL	Normal	12.3801	Total
SJBALL030059_D1	MLL	Normal	2.5265	Total
SJBALL030123_D1	MLL	Normal	0.3485	Total
SJBALL030133_D1	MLL	Normal	0.5729	Total
SJBALL030196_D1	MLL	Normal	0.1901	Total
SJBALL030301_D1	MLL	Normal	0.1276	Total
SJBALL030313_D1	MLL	Normal	0.1193	Total
SJBALL021849_D1	MLL	Normal	4.8002	PolyA
SJINF009_D	MLL	Normal	1.0465	PolyA
SJINF010_D	MLL	Normal	0.8551	PolyA
SJINF011_D	MLL	Normal	2.5479	PolyA
SJINF012_D	MLL	Normal	0.1716	PolyA
SJINF013_D	MLL	Normal	0.0993	PolyA
SJINF014_D	MLL	Normal	0.8523	PolyA
SJINF015_D	MLL	Normal	0.1254	PolyA
SJINF016_D	MLL	Normal	1.0767	PolyA
SJINF018_D	MLL	Normal	0.1276	PolyA
SJINF017_D	MLL	Normal	0.7171	PolyA
SJINF019_D	MLL	Normal	0.6771	PolyA
SJINF020_D	MLL	Normal	0.4422	PolyA
SJINF022_D	MLL	Normal	0.2345	PolyA
SJINF021_D	MLL	Normal	0.2623	PolyA
SJINF053_D	MLL	Normal	12.349	PolyA
SJINF055_D	MLL	Normal	1.1266	PolyA
SJINF059_D	MLL	Normal	0.6884	PolyA
SJINF060_D	MLL	Normal	0.6084	PolyA
SJINF001102_D1	MLL	Normal	0.9358	PolyA
SJINF062_D	MLL	Normal	0.1663	PolyA
SJINF001_E	MLL	Normal	0.3556	PolyA
SJINF002_E	MLL	Normal	0.7339	PolyA
SJINF003_D	MLL	Normal	0.6886	PolyA
SJINF063_D	MLL	Normal	0.1089	PolyA
SJINF064_D	MLL	Normal	0.253	PolyA
SJINF004_D	MLL	Normal	0.0325	PolyA
SJINF006_D	MLL	Normal	5.3358	PolyA
SJINF068_D	MLL	Normal	7.7392	PolyA
SJINF069_D	MLL	Normal	0.1552	PolyA
SJINF008_D	MLL	Normal	0.2356	PolyA
SJINF073_D	MLL	Normal	0.3745	PolyA
SJINF075_D	MLL	Normal	0.4654	PolyA
SJMLL006_D	MLL	Normal	0.8578	PolyA
SJMLL005_D	MLL	Normal	2.3132	PolyA
SJMLL003_D	MLL	Normal	0.0754	PolyA
SJMLL009_D	MLL	Normal	0.3096	PolyA
SJMLL010_D	MLL	Normal	0.0259	PolyA
SJMLL016_D	MLL	Normal	0.2085	PolyA
SJBALL030482_D1	HYPO	Normal	0.1667	Total
SJBALL030448_D1	HYPO	Normal	0.1556	Total
SJBALL030568_D1	HYPO	Normal	0.2256	Total
SJBALL030983_D1	HYPO	Normal	0.1722	Total
SJBALL031052_D1	HYPO	Normal	0.0768	Total
SJHYPO117_D	HYPO	Normal	0.1265	Total
SJHYPO120_D	HYPO	Normal	0.1527	Total
SJHYPO124_D	HYPO	Normal	0.1223	Total
SJBALL021769_D1	HYPO	Normal	0.6684	PolyA
SJBALL021778_D1	HYPO	Normal	0.3759	PolyA
SJHYPER025_D	HYPO	Normal	0.2252	PolyA
SJHYPO020_D	HYPO	Normal	0.1623	PolyA
SJBALL013329_D1	HYPO	Normal	1.2772	PolyA
SJALL050831_D1	HYPO	Normal	0.2761	Total
SJBALL016226_D1	HYPO	Normal	1.1462	Total
SJBALL016248_D1	HYPO	Normal	0.4706	Total
SJBALL016251_D1	HYPO	Normal	1.3413	Total
SJBALL016260_D1	HYPO	Normal	0.2518	Total
SJBALL016284_D1	HYPO	Normal	0.5244	Total
SJBALL016289_D1	HYPO	Normal	0.2134	Total
SJBALL020674_D1	HYPO	Normal	0.2826	PolyA
SJBALL020622_D1	HYPO	Normal	0.5035	PolyA
SJBALL041740_D1	HYPO	Normal	0.6881	Total
SJBALL021563_D1	HYPO	Normal	0.1666	Total
SJBALL021573_D1	HYPO	Normal	0.1619	PolyA
SJBALL041757_D1	HYPO	Normal	0.3358	Total
SJBALL041753_D1	HYPO	Normal	2.0226	Total
SJBALL041741_D1	HYPO	Normal	1.2058	Total
SJBALL021644_D1	HYPO	Normal	0.169	Total
SJBALL041798_D1	HYPO	Normal	0.0985	Total
SJBALL041733_D1	HYPO	Normal	1.3415	Total
SJBALL044264_D1	HYPO	Normal	0.4751	Total
SJHYPO077_D	HYPO	Normal	0.0983	Total
SJHYPO072_D	HYPO	Normal	0.0354	Total
SJHYPO074_D	HYPO	Normal	0.597	Total
SJBALL030379_D1	DUX4	Normal	0.3646	Total
SJBALL030663_D1	DUX4	Normal	0.4498	Total
SJBALL030762_D1	DUX4	Normal	0.0384	Total
SJBALL030975_D1	DUX4	Normal	0.177	Total
SJBALL031281_D1	DUX4	Normal	0.2483	Total
SJBALL030127_D1	DUX4	Normal	0.9427	Total
SJBALL030130_D1	DUX4	Normal	1.5643	Total
SJBALL030145_D1	DUX4	Normal	0.157	Total
SJBALL030170_D1	DUX4	Normal	1.2357	Total
SJBALL020340_D1	DUX4	Normal	0.1305	PolyA
SJBALL020383_D1	DUX4	Normal	0.2951	PolyA
SJBALL020469_D1	DUX4	Normal	0.2888	PolyA
SJBALL020595_D1	DUX4	Normal	0.3899	PolyA
SJBALL020609_D1	DUX4	Normal	0.2642	PolyA
SJBALL020828_D1	DUX4	Normal	0.4827	PolyA
SJBALL021299_D1	DUX4	Normal	0.173	PolyA
SJBALL021324_D1	DUX4	Normal	0.1409	PolyA
SJBALL021333_D1	DUX4	Normal	0.2176	PolyA
SJBALL021336_D1	DUX4	Normal	0.1396	PolyA
SJBALL021372_D1	DUX4	Normal	0.406	PolyA
SJBALL021405_D1	DUX4	Normal	2.0925	PolyA
SJBALL021427_D1	DUX4	Normal	0.3478	PolyA
SJBALL021489_D1	DUX4	Normal	0.9033	PolyA
SJBALL021492_D1	DUX4	Normal	0.1951	PolyA
SJBALL021511_D1	DUX4	Normal	0.2328	PolyA
SJBALL021512_D1	DUX4	Normal	0.5132	PolyA
SJBALL021514_D1	DUX4	Normal	0.1637	PolyA
SJBALL021516_D1	DUX4	Normal	0.2438	PolyA
SJBALL021130_D1	DUX4	Normal	0.338	PolyA
SJBALL215_D	DUX4	Normal	0.035	PolyA
SJBALL218_D	DUX4	Normal	0.3173	PolyA
SJBALL230_D	DUX4	Normal	0.2014	PolyA
SJBALL227_D	DUX4	Normal	0.0358	PolyA
SJERG003_D	DUX4	Normal	0.6035	PolyA
SJERG005_D	DUX4	Normal	0.5928	PolyA
SJERG004_D	DUX4	Normal	0.3318	PolyA
SJERG006_D	DUX4	Normal	0.2096	PolyA
SJERG008_D	DUX4	Normal	0.2371	PolyA
SJERG009_D	DUX4	Normal	0.441	PolyA
SJERG010_D	DUX4	Normal	0.1241	PolyA
SJERG011_D	DUX4	Normal	0.0882	PolyA
SJERG014_D	DUX4	Normal	0.8871	PolyA
SJERG016_D	DUX4	Normal	0.1027	PolyA
SJERG020051_D1	DUX4	Normal	0.2111	PolyA
SJERG020052_D1	DUX4	Normal	0.2328	PolyA
SJERG020300_D1	DUX4	Normal	1.2659	PolyA
SJERG020302_D1	DUX4	Normal	0.1755	PolyA
SJERG020303_D1	DUX4	Normal	0.2039	PolyA
SJERG020304_D1	DUX4	Normal	1.5379	PolyA
SJERG020306_D1	DUX4	Normal	0.1979	PolyA
SJERG020307_D1	DUX4	Normal	0.1872	PolyA
SJERG020309_D1	DUX4	Normal	0.4371	PolyA
SJERG020308_D1	DUX4	Normal	0.0592	PolyA
SJERG020_D	DUX4	Normal	0.086	PolyA
SJERG024_D	DUX4	Normal	0.25	PolyA
SJERG026_D	DUX4	Normal	0.3676	PolyA
SJERG028_D	DUX4	Normal	0.0826	PolyA
SJERG029_D	DUX4	Normal	0.4476	PolyA
SJERG031_D	DUX4	Normal	0.0883	PolyA
SJERG030_D	DUX4	Normal	0.1384	PolyA
SJBALL021081_D1	DUX4	Normal	0.6364	Total
SJERG020050_D1	DUX4	Normal	0.0458	Total
SJERG020299_D1	DUX4	Normal	0.102	Total
SJERG020305_D1	DUX4	Normal	0.0802	PolyA

## Sheet: STable 2 DEG
Supplementary Table 2. 1150 up- and down-regulated differential expressed genes upon GATA2 activation.
Gene Symbol	log2FoldChange(GATA2-outlier/GATA2-normal)	p-value	q-value	DEG label	313 fimo target
CLC	7.69694	4.82043e-33	5.06338e-29	up	no
HSPA1B	5.88738	1.30437e-30	6.85056e-27	up	no
HSPA1A	5.03021	3.13665e-27	1.09825e-23	up	no
POU4F1	5.70226	1.21878e-25	3.20052e-22	up	no
TMPRSS15	5.65271	2.80418e-18	5.89102e-15	up	no
PADI4	4.53124	5.54322e-18	9.70433e-15	up	no
HSPE1	2.01806	2.3821e-14	3.57451e-11	up	no
LTC4S	1.73079	5.59509e-14	7.34635e-11	up	no
RNASE2	4.53123	6.83394e-14	7.97596e-11	up	no
BAG3	3.40274	7.86981e-14	8.26645e-11	up	yes
CFD	3.41916	1.77787e-13	1.69771e-10	up	no
IER5	2.40371	9.21106e-13	6.91093e-10	up	no
MS4A3	4.40527	2.29955e-12	1.6103e-09	up	yes
RGS2	3.1502	2.62727e-12	1.7248e-09	up	no
LCN2	4.74756	1.79841e-11	1.11121e-08	up	no
S100A8	4.05536	2.87149e-11	1.67567e-08	up	no
RASD1	2.27999	3.57313e-11	1.97538e-08	up	no
G0S2	4.167	4.78327e-11	2.51217e-08	up	no
CLEC12A	3.36215	6.351e-11	3.17671e-08	up	no
HYAL3	1.47699	1.38201e-10	6.59847e-08	up	no
CD244	2.1425	2.4861e-10	1.13539e-07	up	no
PGLYRP1	4.08061	2.855e-10	1.24954e-07	up	yes
S100A12	4.04312	4.50108e-10	1.69925e-07	up	no
MMP8	4.5014	4.32137e-10	1.69925e-07	up	no
PRTN3	4.10444	4.52961e-10	1.69925e-07	up	no
DNAJB1	1.69959	5.59052e-10	2.02493e-07	up	no
PLBD1	3.2416	7.28951e-10	2.5523e-07	up	no
MNDA	3.54408	8.71528e-10	2.95307e-07	up	no
ITGA2B	2.56407	9.02721e-10	2.96318e-07	up	no
CTSA	0.996079	2.57994e-09	7.74276e-07	up	no
RAB44	2.52517	2.74929e-09	8.02183e-07	up	no
FAM45A	0.981587	3.22181e-09	9.14645e-07	up	no
TENT5A	2.64436	3.87096e-09	1.07001e-06	up	no
TRIB1	2.17282	4.78286e-09	1.28818e-06	up	no
OSCAR	2.49112	6.07409e-09	1.59506e-06	up	no
HK3	3.04277	6.39488e-09	1.63834e-06	up	no
AZU1	3.29659	1.04696e-08	2.49937e-06	up	no
LTF	4.1145	1.59693e-08	3.72759e-06	up	yes
S100P	3.34905	2.46184e-08	5.50194e-06	up	no
CXCL8	3.60021	2.71295e-08	5.93684e-06	up	no
QSOX1	0.986422	3.56335e-08	7.59679e-06	up	no
ELANE	3.61925	5.3357e-08	1.07781e-05	up	no
HAL	2.14866	5.71678e-08	1.133e-05	up	no
IER5L	2.56969	6.00527e-08	1.16462e-05	up	no
HSPH1	1.3974	6.09807e-08	1.16462e-05	up	no
GADD45B	2.31744	1.1095e-07	1.97528e-05	up	no
LYZ	2.91083	1.58386e-07	2.77281e-05	up	no
ENAH	1.57538	1.81435e-07	3.02422e-05	up	no
PYGL	2.01189	1.84263e-07	3.02422e-05	up	no
MMP9	3.11561	2.10047e-07	3.34293e-05	up	no
ACSM3	2.18722	2.462e-07	3.80307e-05	up	no
TWISTNB	0.977291	2.88235e-07	4.38785e-05	up	no
ATP8B4	2.43211	3.27488e-07	4.91419e-05	up	no
TOMM40L	0.777837	3.74553e-07	5.54127e-05	up	no
TXNRD3	1.7503	3.86682e-07	5.64126e-05	up	yes
ANXA1	2.0589	4.33926e-07	6.24378e-05	up	no
HSPA1L	1.49186	4.80656e-07	6.65469e-05	up	no
RETN	2.79768	4.84568e-07	6.65469e-05	up	no
PRAM1	1.70728	5.71208e-07	7.69227e-05	up	no
MXD1	1.33671	6.20172e-07	8.24593e-05	up	no
ADGRG3	2.19713	7.43201e-07	9.75823e-05	up	no
CEBPD	2.43968	7.55197e-07	9.79332e-05	up	no
APOBEC3A	2.48895	7.76412e-07	9.94564e-05	up	no
MAP1LC3A	1.66253	7.9221e-07	0.000100258	up	no
LHFPL2	1.58134	1.00465e-06	0.000125629	up	no
PHKG2	0.583712	1.01934e-06	0.000125967	up	no
ABHD5	1.08199	1.48648e-06	0.000179471	up	no
TPCN1	1.29208	1.54786e-06	0.000181896	up	no
SPSB2	1.10485	1.63243e-06	0.000188429	up	no
FCN1	2.56765	1.65342e-06	0.000188778	up	no
BCL2A1	1.93114	1.76688e-06	0.000195361	up	no
ALAS1	0.811435	1.83904e-06	0.000201222	up	no
NETO1	3.33658	1.86675e-06	0.000202148	up	no
C5AR1	2.03463	1.92031e-06	0.000205825	up	no
HSPA2	2.20902	2.03847e-06	0.000212	up	no
THBS1	2.77799	2.16143e-06	0.000220424	up	no
DEPP1	1.73362	2.25606e-06	0.000227862	up	no
KLHL21	1.11774	2.62777e-06	0.000262877	up	no
C1orf109	0.774712	2.77444e-06	0.000274931	up	no
IER3	2.16353	3.07822e-06	0.000302183	up	no
PLK2	2.08929	3.25288e-06	0.00031347	up	no
BLOC1S4	0.793651	3.41797e-06	0.000326314	up	no
OSM	1.6606	3.44829e-06	0.000326314	up	no
NMB	0.99889	3.50564e-06	0.000328779	up	no
CD151	1.40406	3.98736e-06	0.000367397	up	no
NME3	1.29891	4.21231e-06	0.000384429	up	no
SLC39A3	0.870895	4.48829e-06	0.000402949	up	no
SRGN	1.88242	4.72677e-06	0.000420763	up	no
EIF4A3	1.32152	5.38924e-06	0.000456521	up	no
FUCA2	1.4679	5.77094e-06	0.000484944	up	no
CITED4	1.65533	5.89418e-06	0.000491369	up	no
S100A9	2.69944	6.61278e-06	0.000538454	up	no
DEFA3	4.18586	6.57065e-06	0.000538454	up	no
CCL3	2.1664	6.73577e-06	0.00054425	up	no
CCDC189	0.984904	7.00426e-06	0.000557369	up	yes
NOCT	1.25016	7.93085e-06	0.000617079	up	no
USP20	0.679274	8.37794e-06	0.000647072	up	no
GDE1	0.714602	1.08517e-05	0.000820045	up	no
RGS18	2.13601	1.17174e-05	0.000866757	up	no
CORO2A	1.41609	1.26023e-05	0.000912926	up	no
STXBP2	0.734131	1.2926e-05	0.000929961	up	yes
BST1	1.2332	1.37102e-05	0.000973053	up	no
WDR74	0.950058	1.40109e-05	0.000987725	up	yes
MAPKAPK3	0.74265	1.4589e-05	0.00101485	up	no
ATP6V0A1	1.62445	1.44943e-05	0.00101485	up	no
CXXC5	1.46342	1.61618e-05	0.00109523	up	yes
ZNF844	0.923759	1.62674e-05	0.00109523	up	no
RGS9	1.64298	1.86295e-05	0.00120793	up	no
TYROBP	1.71616	1.88928e-05	0.00121748	up	no
RASGRP4	1.69859	1.95852e-05	0.00123341	up	no
CST7	1.68577	1.99772e-05	0.00124905	up	no
LRRC25	1.75192	2.16904e-05	0.00131136	up	no
PAQR7	0.873262	2.2269e-05	0.00132155	up	no
FCER1G	1.96688	2.21613e-05	0.00132155	up	no
FAM173A	1.11715	2.33868e-05	0.00135721	up	no
APOBR	1.38999	2.33427e-05	0.00135721	up	no
GRPEL1	0.712936	2.38792e-05	0.00137064	up	no
NFE2	1.62115	2.48515e-05	0.00141103	up	no
PRDM1	1.58125	2.59898e-05	0.00143682	up	no
DNASE2	1.05352	2.58426e-05	0.00143682	up	no
SAMSN1	1.51578	2.55092e-05	0.00143682	up	no
RGS10	1.45364	2.65057e-05	0.00145767	up	no
SLC40A1	1.87108	2.72325e-05	0.00147519	up	no
VMP1	0.758372	2.71692e-05	0.00147519	up	no
PTPN7	1.35395	2.76608e-05	0.00148239	up	no
ENDOG	0.975043	2.79278e-05	0.0014891	up	no
GADD45A	1.20005	2.92433e-05	0.00154357	up	no
TOP1MT	0.920532	2.96253e-05	0.00154857	up	no
NAPRT	1.05721	3.09124e-05	0.00159169	up	no
IRF5	1.1926	3.19742e-05	0.00163833	up	no
CEBPA	2.07051	3.30888e-05	0.00167098	up	no
EGFL7	1.35734	3.46805e-05	0.00173051	up	no
GALE	0.679057	3.53606e-05	0.00175202	up	no
FBXL15	0.786615	4.22299e-05	0.00198028	up	no
NAA80	0.679941	4.29271e-05	0.00198343	up	no
SNTB1	1.2962	4.3024e-05	0.00198343	up	no
SUSD1	0.653355	4.35799e-05	0.00198343	up	no
NME4	0.886015	4.36189e-05	0.00198343	up	no
MCRIP2	1.07874	4.25842e-05	0.00198343	up	no
LAPTM4B	1.92958	4.59023e-05	0.00207563	up	no
GCAT	1.29235	4.68169e-05	0.00209261	up	no
CD63	0.887805	4.7158e-05	0.00209893	up	no
KCNH2	2.09705	4.80982e-05	0.00213174	up	no
C4orf48	1.43336	5.01379e-05	0.00221281	up	no
ZFP36	1.30734	5.23658e-05	0.00228236	up	no
GATA3	1.66914	5.2841e-05	0.00229356	up	no
SIPA1L2	1.1945	5.78132e-05	0.00243911	up	no
PCYT2	0.60076	5.80519e-05	0.00243911	up	no
NR2F6	0.964576	5.74658e-05	0.00243911	up	no
CD300LF	1.44638	5.94244e-05	0.00248683	up	no
ESAM	1.91648	6.08166e-05	0.00252497	up	no
PODXL2	1.4695	6.32844e-05	0.00260682	up	no
JUNB	1.51008	6.40943e-05	0.00262987	up	no
MAP2K7	0.657504	6.43951e-05	0.00263193	up	no
TMEM150A	0.74811	6.70623e-05	0.00270932	up	yes
PNMA1	0.831301	6.87909e-05	0.00274745	up	no
NT5M	1.09083	6.87152e-05	0.00274745	up	no
PPBP	2.56397	7.42354e-05	0.00293146	up	yes
TGFBR3	1.58249	7.79173e-05	0.00303127	up	no
LILRB3	1.52867	7.76881e-05	0.00303127	up	no
ZBTB7A	0.766976	8.04051e-05	0.00309368	up	no
GADD45GIP1	0.71576	8.11069e-05	0.0031093	up	no
MPO	2.23276	8.51897e-05	0.00324215	up	no
HEXIM1	1.00003	8.69323e-05	0.00328466	up	no
ALOX12	1.54487	8.75839e-05	0.00328572	up	no
MCOLN1	0.809403	8.75859e-05	0.00328572	up	no
TESC	1.65966	8.96884e-05	0.0033204	up	no
CEACAM1	1.56303	9.02739e-05	0.0033204	up	no
ZNF438	0.737943	9.90243e-05	0.00355	up	no
B4GALT5	0.981841	0.000102631	0.00364191	up	no
GADD45G	1.90592	0.000104313	0.00366331	up	no
PLPPR2	0.943882	0.000105271	0.00366331	up	no
RAD23A	0.648005	0.000104373	0.00366331	up	no
TFR2	1.59709	0.000106568	0.00369437	up	no
MGAT3	1.51762	0.000110968	0.00380919	up	no
PIWIL4	0.901645	0.000111954	0.00381807	up	no
ARRDC1	0.649682	0.000112969	0.00382799	up	no
CITED2	0.980222	0.000115805	0.00391129	up	no
NRGN	1.76763	0.000117223	0.00394649	up	no
ELOVL6	1.23087	0.000118251	0.00396201	up	yes
RNF144B	1.52908	0.000123339	0.00407406	up	no
FAM117A	0.886483	0.000127226	0.00417619	up	no
PNKD	0.694608	0.000127877	0.00418449	up	no
MSRB1	1.18911	0.000128378	0.00418782	up	no
THG1L	0.642519	0.000131504	0.00422728	up	yes
DUSP5	2.02631	0.000131599	0.00422728	up	no
DYRK1B	0.975347	0.000135957	0.0043407	up	no
FRAT2	0.703656	0.000137965	0.00436501	up	no
ERLIN1	0.882571	0.000137748	0.00436501	up	no
SERPINB6	1.03896	0.000139953	0.0044014	up	no
FAM124B	1.723	0.000147702	0.00461403	up	no
CPNE7	1.45757	0.000148032	0.00461403	up	no
PLCB2	0.63751	0.000152184	0.0047294	up	no
PGD	0.62773	0.000152908	0.00473789	up	no
DNAJA4	1.58312	0.000155998	0.00481942	up	no
ARHGAP18	1.09903	0.000156757	0.00482868	up	no
CDKN1C	1.50574	0.000162497	0.00496184	up	no
PHF13	0.856138	0.000164013	0.0049936	up	no
DHRS7	0.841995	0.000174043	0.00523824	up	no
GOLGA8A	1.3628	0.000179619	0.00534644	up	no
LILRA5	1.83141	0.000180183	0.00534644	up	no
SERPINA1	1.97391	0.000187299	0.0054802	up	no
ENPP4	1.47394	0.000190388	0.00553971	up	yes
SYNGR2	0.68931	0.000204671	0.00585794	up	no
KCNN4	1.21647	0.000205233	0.00585806	up	no
MYPOP	0.604469	0.000207599	0.00590955	up	no
GCA	1.11977	0.000212361	0.00599634	up	no
LYL1	0.892713	0.000213709	0.00601822	up	no
HABP4	0.889713	0.000219661	0.00615286	up	no
MRPS34	0.786616	0.000220318	0.00615485	up	no
SNAPC2	0.633009	0.000223873	0.00622909	up	no
CST3	1.27257	0.000224162	0.00622909	up	no
NFIX	1.17053	0.000225662	0.00624441	up	no
DOK2	1.1788	0.000233729	0.00642694	up	no
RCL1	0.67756	0.000244211	0.00662842	up	no
FKBP4	1.12392	0.000245377	0.0066429	up	no
PLAGL1	1.11392	0.000249327	0.00673247	up	no
TALDO1	0.762456	0.000261644	0.00694008	up	no
NAMPT	1.04268	0.000265422	0.00696998	up	no
GRINA	0.70349	0.000279039	0.00729112	up	no
ARG1	1.61248	0.000280503	0.00731116	up	yes
CHST12	0.908193	0.00028244	0.00733976	up	no
NOXA1	1.337	0.000290348	0.00743858	up	no
LGALS1	1.45364	0.000291213	0.00744258	up	no
SOCS3	1.64046	0.000301539	0.0076322	up	no
JUN	1.40362	0.000310243	0.00777754	up	no
CCDC159	0.637161	0.000312278	0.00780992	up	no
SLC9A1	0.724819	0.000323758	0.00805867	up	no
LSM10	0.654263	0.000326054	0.00809256	up	no
EFHD2	0.710148	0.000331014	0.00817045	up	no
SSX2IP	0.789075	0.000331361	0.00817045	up	no
LYSMD2	0.614298	0.000341124	0.00831228	up	no
RRS1	0.880092	0.000343307	0.00832816	up	no
ADGRE1	1.32964	0.000353086	0.00854567	up	no
GPR137B	1.06521	0.000365986	0.00879707	up	no
CSF1	1.36294	0.000367378	0.00881036	up	no
HGF	1.41322	0.000371047	0.00883782	up	no
PIGQ	0.773302	0.000370765	0.00883782	up	no
ENO2	1.0409	0.000378732	0.00895389	up	no
MS4A6A	1.61448	0.000385883	0.00901956	up	no
BLVRA	0.902592	0.000389833	0.0090794	up	no
SPINK2	1.64314	0.000391027	0.00908705	up	no
ALDOA	0.944025	0.000395407	0.00914836	up	no
TUBB1	1.62852	0.000409315	0.00939956	up	no
ERN1	0.769807	0.000415689	0.00949218	up	no
SH3BP1	0.826527	0.000418502	0.00953567	up	yes
SCO2	1.08915	0.000423128	0.00962022	up	no
ST3GAL4	0.749082	0.000424587	0.00963201	up	no
PHYH	0.861014	0.000427323	0.0096529	up	no
STARD5	0.779609	0.000444408	0.00991095	up	no
FHL3	1.02829	0.00045163	0.0100294	up	no
MAST4	1.26248	0.000459706	0.0101872	up	no
PRSS57	1.48145	0.000462034	0.0101958	up	no
STX11	1.50857	0.000463341	0.0102032	up	no
PLEK	1.08497	0.000479246	0.0104648	up	no
ORAI3	0.650293	0.000480203	0.0104648	up	no
PWWP2B	1.28901	0.000481808	0.0104781	up	no
FRAT1	0.654547	0.000483979	0.0104925	up	no
TOM1	0.748894	0.000493829	0.0106513	up	no
TBC1D2	0.758114	0.000504274	0.0108321	up	no
EIF4EBP1	0.78186	0.000512477	0.0109858	up	no
NATD1	1.15282	0.000523218	0.0111705	up	no
PLTP	1.17735	0.000524453	0.0111741	up	no
STK11	0.591523	0.0005373	0.0114211	up	no
RAB3D	0.983991	0.000546483	0.0115731	up	no
UAP1L1	1.03457	0.000553878	0.0116252	up	no
HES6	1.42866	0.000558251	0.0116578	up	no
AOAH	1.18014	0.000560057	0.0116723	up	no
ANPEP	1.39736	0.000564263	0.0117367	up	no
DNPH1	0.931827	0.000571208	0.011796	up	no
SSBP3	0.92406	0.000585834	0.0119953	up	no
COL24A1	1.8423	0.000602479	0.0121467	up	no
COTL1	1.10391	0.000621176	0.0123811	up	no
S100A11	1.5868	0.000631633	0.0125657	up	no
SEMA4C	1.12931	0.000634159	0.0125921	up	no
POMGNT2	1.05963	0.000640964	0.0126554	up	no
TEX30	0.712508	0.000645751	0.012726	up	no
NOL4L	1.01057	0.000651823	0.0127977	up	no
DOK1	0.895275	0.000660317	0.0129161	up	no
MTRNR2L8	1.25127	0.000664265	0.0129692	up	no
AGPAT2	0.735798	0.000667522	0.0129845	up	no
RUNX3	1.23851	0.000685544	0.013237	up	no
ISYNA1	0.945517	0.000688251	0.0132649	up	no
PIP4K2C	1.30519	0.000701791	0.0133786	up	no
ADM	1.78135	0.00071455	0.0135673	up	no
ARL2	0.807734	0.000716721	0.0135673	up	no
TPRN	0.634873	0.000739181	0.0138683	up	no
TUBA1C	0.612127	0.000753586	0.0140848	up	no
METTL26	0.63396	0.000777173	0.0143976	up	no
PPP1R16A	0.697901	0.000788411	0.0145417	up	no
FAM110A	0.826295	0.000789107	0.0145417	up	no
FGR	1.4127	0.000807156	0.0148223	up	no
ANKRD9	1.25617	0.000810833	0.0148639	up	no
CTSG	2.16605	0.000830872	0.0151782	up	no
SLC6A6	0.935193	0.000841199	0.0153136	up	no
CORO7	0.741113	0.000861614	0.0155773	up	no
OAT	0.844059	0.000867974	0.0156653	up	no
TANK	0.620895	0.000884221	0.015873	up	no
PPFIBP2	1.07379	0.000908849	0.0161532	up	no
ELOF1	0.594969	0.000914635	0.016201	up	no
ATF3	1.55308	0.000940693	0.0165789	up	no
SMO	1.05001	0.000950939	0.0167314	up	no
SNX32	0.861496	0.000961732	0.016893	up	no
EHD1	0.826482	0.000977999	0.0171215	up	no
TFRC	0.890735	0.000988873	0.0171571	up	no
RAB40C	0.593927	0.00100402	0.0172607	up	no
ERMAP	0.962142	0.00104563	0.0178012	up	no
LRRK2	1.38332	0.00105625	0.0179239	up	no
NAT14	0.663832	0.00105464	0.0179239	up	no
PCBD1	1.09607	0.0011148	0.0187059	up	no
AC005840.1	0.906069	0.00118024	0.0194925	up	no
TES	1.33122	0.00120725	0.0199073	up	no
JAML	1.39965	0.00124925	0.0202815	up	no
ADGRG5	1.11636	0.0012475	0.0202815	up	no
SLC2A6	0.952306	0.00126103	0.0204096	up	no
SLC2A1	0.918765	0.00132109	0.0210893	up	no
UPP1	1.36858	0.00131803	0.0210893	up	no
PSTPIP2	1.07896	0.00131832	0.0210893	up	no
HCST	1.11423	0.00131773	0.0210893	up	no
ORAI1	0.592645	0.00132893	0.0211823	up	no
PARVB	1.09831	0.00135912	0.0215381	up	no
MTRNR2L12	1.21269	0.00137576	0.0217308	up	no
HGSNAT	0.86823	0.00138325	0.0218163	up	no
CLIP4	1.36773	0.00139784	0.021929	up	no
SSBP4	0.774068	0.00140393	0.0219774	up	no
DUSP23	1.10925	0.0014129	0.0220468	up	no
NPL	1.21182	0.00144099	0.0223504	up	no
ITGAX	1.308	0.00143863	0.0223504	up	no
PFDN2	0.588651	0.00146271	0.0225687	up	no
KEL	1.63007	0.00146533	0.0225687	up	no
CEBPB	1.18465	0.00147882	0.0227098	up	no
TGFB1	0.807344	0.00148805	0.0227849	up	no
SLA2	1.11142	0.00153008	0.023259	up	no
VAMP8	0.69885	0.00156071	0.0236561	up	no
TRAF3	0.616405	0.00157339	0.0237797	up	no
FTH1	0.9304	0.00157873	0.023792	up	no
UBAC1	0.620535	0.00163005	0.0244402	up	no
RITA1	0.643597	0.00164757	0.0246174	up	no
CTSD	0.89397	0.00169637	0.0252032	up	no
LACTB	0.656191	0.00172392	0.0255043	up	no
HSPD1	0.584158	0.00173145	0.0255796	up	no
METRN	0.864008	0.00174809	0.0257171	up	no
C8orf82	1.05551	0.00175122	0.0257271	up	no
SELPLG	1.2656	0.00184072	0.0267054	up	no
S100Z	1.23344	0.00184623	0.0267119	up	no
ZC3H12A	1.05479	0.00188381	0.0271435	up	no
ADRB2	0.985281	0.00189431	0.0271675	up	no
MFSD2B	1.34946	0.0019181	0.027321	up	no
HMBS	1.25195	0.00191954	0.027321	up	no
LTBP3	0.85097	0.00192672	0.027386	up	no
PBX4	1.13402	0.00194282	0.0275403	up	no
NEU1	0.738162	0.00194856	0.0275844	up	no
ELL	0.678849	0.00195434	0.027629	up	no
MAFB	1.45585	0.0019784	0.0279316	up	no
WIPI1	0.965705	0.00204514	0.0285942	up	no
ITPKB	0.691018	0.00206828	0.0287371	up	no
BATF	0.853585	0.00206609	0.0287371	up	no
RHPN1	0.92636	0.00209802	0.0289054	up	no
UBE2E3	0.97963	0.00210261	0.0289081	up	no
SIGLEC10	0.99236	0.00213678	0.0292468	up	no
AKR1C3	1.22178	0.00217941	0.0296919	up	no
ST3GAL6	1.05591	0.00218365	0.0297113	up	yes
SLC45A3	1.16654	0.00226416	0.0303907	up	no
RAB5IF	0.709403	0.00226937	0.0304049	up	no
NFKBIA	1.00203	0.00229775	0.0306678	up	no
TMEM8A	0.580242	0.00229667	0.0306678	up	no
ARL4D	1.07304	0.00233414	0.0310352	up	no
IRF7	0.86178	0.00235846	0.03124	up	no
KLF1	1.72928	0.00236615	0.031263	up	yes
SESN2	0.890874	0.00237511	0.0313419	up	no
RGCC	1.14493	0.00239483	0.0314834	up	no
RARA	1.13674	0.00240775	0.031535	up	no
HEBP1	0.684224	0.00242425	0.031672	up	no
HNRNPLL	1.21002	0.00245195	0.0317137	up	no
CCDC57	0.582975	0.00247719	0.0318487	up	no
NUDT19	0.954649	0.00251627	0.0321053	up	no
TMEM216	0.635485	0.00255541	0.0324228	up	yes
VAT1	0.628757	0.0025558	0.0324228	up	no
CCDC85B	0.83338	0.00258671	0.0327359	up	no
FAS	0.900643	0.00261789	0.0329716	up	no
EBF4	1.46611	0.00264119	0.0331284	up	no
RYK	0.780422	0.00268646	0.0333948	up	no
TPI1	0.610071	0.00269807	0.0334994	up	no
TXN	0.693061	0.00270567	0.0335146	up	no
DHX32	0.963261	0.00272586	0.0336853	up	no
SDHAF1	0.602485	0.00273791	0.0337547	up	no
CD84	0.905171	0.0027924	0.0343057	up	no
SAMD10	0.791763	0.00280498	0.0343398	up	no
EVA1B	0.800843	0.00281553	0.0343919	up	no
RGS1	1.37248	0.00290736	0.0352644	up	no
PPP1R14B	0.615903	0.0029047	0.0352644	up	no
LY6E	0.908302	0.00296032	0.0357827	up	no
FNDC3B	0.827084	0.00299358	0.0360556	up	no
CREG1	0.88483	0.00309719	0.0370008	up	yes
TICAM1	0.743972	0.00312695	0.0371555	up	no
NT5C	0.646545	0.0031347	0.0371636	up	no
C1QTNF4	1.41563	0.00314385	0.03723	up	no
DPM2	0.646201	0.00314804	0.0372377	up	no
TNRC18	0.631611	0.00315963	0.0373326	up	yes
C1orf198	0.696917	0.00317765	0.0374613	up	no
SLC22A4	1.04014	0.00331473	0.0384903	up	no
CYSTM1	1.09283	0.00331624	0.0384903	up	no
TSTA3	0.663044	0.0033385	0.0386685	up	no
PTGS1	0.783937	0.00338175	0.0389923	up	no
CTSZ	0.625835	0.00338942	0.0390378	up	no
SLC16A3	0.954234	0.00341219	0.0391139	up	no
PDZK1IP1	1.72151	0.00345696	0.0394695	up	no
PPOX	0.598629	0.00346442	0.0395117	up	no
RANBP10	0.583051	0.00357203	0.0404195	up	no
IL18RAP	1.13314	0.00358925	0.0405392	up	no
BSG	0.822755	0.00364713	0.0410165	up	no
SNX10	1.08211	0.00365467	0.0410574	up	no
IFI6	1.18295	0.00370031	0.0411963	up	no
MRPL33	0.654697	0.00390176	0.0424706	up	no
SERPINB1	0.585702	0.00389683	0.0424706	up	no
MROH6	0.778504	0.00388085	0.0424706	up	no
FSTL3	0.656798	0.00390747	0.0424887	up	no
AL136454.1	1.04565	0.00396591	0.0429021	up	no
MTX2	1.05038	0.00398443	0.0430531	up	no
SLC35C1	0.621709	0.00400875	0.0431751	up	no
AC139530.1	0.719926	0.00404366	0.0434745	up	no
FCGR2A	0.961583	0.00406123	0.0436188	up	no
NPM3	0.659849	0.00407118	0.0436809	up	no
ID1	1.42693	0.00410149	0.0438551	up	no
CDC34	0.700353	0.00411658	0.0439436	up	no
STK17A	0.64532	0.00413603	0.0441064	up	no
AGL	0.747629	0.00420562	0.0441904	up	no
ACHE	1.47757	0.00415306	0.0441904	up	no
CEBPE	1.21914	0.00417888	0.0441904	up	no
ZNHIT2	0.603772	0.00422841	0.0443265	up	no
PRR5L	0.884297	0.00434466	0.045203	up	no
SLC9A3R2	1.20368	0.0043487	0.045203	up	no
FZD6	1.2967	0.00439048	0.0453022	up	no
S1PR2	1.12343	0.00449503	0.0459745	up	no
ABCC4	0.98044	0.00457159	0.0463513	up	no
PRR22	0.650134	0.00459567	0.0465058	up	no
PRR5	0.749854	0.00460592	0.0465646	up	no
CYBRD1	0.890429	0.004688	0.0471674	up	no
SLC36A1	1.03429	0.00480115	0.0478022	up	no
PPP1R15A	0.998505	0.00480047	0.0478022	up	yes
INPP1	0.937447	0.00484581	0.0480646	up	no
TRH	1.61686	0.00490497	0.0485597	up	no
SLC43A1	0.713078	0.00492765	0.0486925	up	no
MT2A	1.16547	0.00495274	0.0488484	up	no
ZNF219	0.918295	0.0050928	0.0496646	up	no
RILP	0.677259	0.00513753	0.049921	up	no
MRPL12	0.719474	0.00516102	0.0500566	up	no
HAGHL	0.926943	0.00516754	0.0500736	up	no
BLVRB	1.28805	0.0051865	0.0501648	up	no
TNFSF9	1.30377	0.00519596	0.0502101	up	no
HCAR3	1.47452	0.00524451	0.0505397	up	no
IFIT2	1.06015	0.00531401	0.0510223	up	no
TAL1	1.4432	0.00538955	0.0514653	up	no
GRAP2	1.106	0.0054974	0.0520223	up	no
AREG	1.92042	0.00550955	0.0520903	up	no
ZNF331	0.781783	0.00553773	0.0522157	up	no
TYMP	1.16556	0.00553433	0.0522157	up	no
BCL9L	0.719047	0.00558586	0.0524336	up	no
FAM118A	0.669107	0.00560113	0.0524425	up	no
PTPN22	0.807203	0.0056599	0.0527053	up	no
ITGAL	0.761051	0.0056697	0.0527498	up	no
HSPA5	0.878817	0.0057699	0.0534502	up	no
SLC29A1	0.766841	0.00585312	0.0539431	up	no
FURIN	0.6415	0.00589915	0.0541176	up	no
GCLC	0.802933	0.00592668	0.0542754	up	no
ATG2A	0.68929	0.00602991	0.0549811	up	no
B3GNT7	1.22962	0.00610624	0.0553888	up	no
ISOC2	0.638981	0.00612202	0.0553888	up	no
IL2RB	1.11013	0.00616345	0.0555639	up	no
ARNTL	0.678937	0.00621613	0.0558548	up	no
DDIT3	1.03388	0.00622595	0.0558952	up	no
PNP	0.690681	0.00631055	0.0565472	up	no
TOR4A	0.797381	0.00634995	0.0567176	up	no
ABHD11	0.704367	0.006376	0.0568054	up	no
OTULINL	1.05115	0.00638909	0.0568737	up	no
PLCXD2	0.768014	0.00641625	0.0569227	up	no
LYN	0.631084	0.00642169	0.0569227	up	no
EMILIN2	0.867468	0.00653519	0.0575887	up	no
CCL3L1	1.59377	0.00655732	0.0576946	up	no
FTL	0.707485	0.00655999	0.0576946	up	no
SQSTM1	0.623366	0.00658959	0.0577771	up	no
GBP2	0.94174	0.00661951	0.0578945	up	no
PAXX	0.591285	0.0066661	0.0581085	up	no
RASSF10	1.3637	0.00676774	0.0586537	up	no
SNAI1	1.17675	0.00680689	0.0589444	up	yes
PKN3	0.699726	0.00682811	0.0590308	up	no
GLIPR2	0.674396	0.00686349	0.0592879	up	no
GLUL	0.698089	0.00693978	0.0597014	up	no
MLLT3	1.09131	0.00697849	0.0597896	up	no
PRDX2	1.1392	0.00697344	0.0597896	up	no
RAC3	0.711775	0.00700522	0.0599697	up	no
TTC38	0.614729	0.00709185	0.060514	up	no
BIN2	0.924996	0.00718869	0.0609513	up	no
ABHD4	0.807686	0.00716757	0.0609513	up	no
ANKLE1	0.698209	0.0071947	0.0609513	up	yes
ZBP1	1.04834	0.00716441	0.0609513	up	no
CCDC78	0.85251	0.00736988	0.0618854	up	no
SERTAD1	0.949954	0.00742903	0.0621385	up	no
PPP2R5B	0.582473	0.00746597	0.0622895	up	no
TRAF1	0.730746	0.00758496	0.0630819	up	no
MYC	0.681887	0.00767451	0.0634749	up	no
NHLRC4	0.719887	0.00770088	0.0635895	up	no
RIPOR3	1.306	0.00780186	0.0641045	up	no
COL9A2	0.731991	0.00783579	0.0642522	up	no
CTU1	0.61545	0.00785716	0.0643271	up	no
TST	0.680751	0.00800026	0.0650424	up	no
CCL5	1.07537	0.00833456	0.0671882	up	no
TMOD1	1.37683	0.0083615	0.0673537	up	no
SLC9A3R1	0.629436	0.00843187	0.0676095	up	no
MYO1F	0.686929	0.00847542	0.0678034	up	no
ID2	0.969316	0.00853363	0.0681134	up	no
HERPUD1	0.725968	0.00860961	0.0686156	up	no
MRPL24	0.590054	0.00887096	0.0700079	up	no
CHAC1	1.01929	0.00901427	0.0705821	up	no
EPOR	1.18358	0.00903074	0.0706321	up	yes
CD83	1.19526	0.00932917	0.0721602	up	no
DPM3	0.620473	0.00938912	0.0725171	up	no
HAVCR2	0.973789	0.00944475	0.0728397	up	no
FGFRL1	0.616678	0.00948365	0.0729639	up	no
CD36	1.27699	0.00948839	0.0729639	up	no
PLBD2	0.786302	0.00948865	0.0729639	up	no
NDFIP1	0.820413	0.00953722	0.0732232	up	no
APP	0.808469	0.00955025	0.0732232	up	no
UROD	0.604961	0.00958159	0.0734099	up	no
HMOX1	1.21826	0.00960639	0.0735463	up	no
CTSW	0.908439	0.00965115	0.0737278	up	no
CMTM2	1.01245	0.00982676	0.0746523	up	no
PIP4K2A	0.698416	0.010017	0.0756424	up	no
PXN	0.731894	0.0101041	0.0761473	up	no
RAB20	1.00124	0.0103081	0.0768589	up	no
CSKMT	0.758128	0.0104371	0.0775329	up	yes
C20orf27	0.685008	0.0106103	0.078321	up	no
TSPO	0.73622	0.0106231	0.0783601	up	no
CIB1	0.61165	0.0107146	0.0788691	up	no
FHDC1	1.31892	0.0107876	0.0792396	up	no
PRXL2A	0.656854	0.0108213	0.0793764	up	no
PHACTR2	0.830216	0.0108407	0.0794466	up	no
CMTM4	0.649609	0.0109178	0.0798055	up	no
OAF	0.609426	0.0109567	0.0800187	up	no
RIN3	0.805103	0.0110511	0.0805559	up	no
TMIGD2	0.984915	0.0112068	0.081016	up	no
MYLIP	0.794794	0.0112367	0.0810646	up	no
KCTD11	0.648861	0.0112473	0.0810853	up	no
OASL	1.23861	0.0113008	0.0812479	up	no
ZNF628	0.655385	0.0116009	0.0825021	up	no
MFSD2A	0.990863	0.0117183	0.083056	up	no
GBP5	0.873655	0.0118134	0.0835609	up	no
CISH	0.78901	0.0119591	0.084251	up	no
SLAMF7	1.03196	0.0121316	0.0849744	up	no
GJC2	0.747025	0.0124273	0.0859926	up	no
DYNLL1	0.6158	0.012422	0.0859926	up	no
HK1	0.66236	0.0124641	0.0861905	up	no
NOD2	0.933214	0.0124761	0.0862162	up	no
GOLM1	0.727507	0.0126161	0.0868981	up	no
CKB	0.862806	0.0127405	0.0875251	up	no
SCX	0.704897	0.0127674	0.0875953	up	no
EID3	0.653455	0.012881	0.0880301	up	no
DAPK1	0.908391	0.0129167	0.0881023	up	no
SPATC1L	0.728732	0.0129899	0.0883716	up	no
TTLL12	0.615384	0.0131531	0.0891356	up	no
RAB31	1.23127	0.0131844	0.08929	up	no
LGALS3	1.14511	0.0134058	0.0903816	up	no
APOBEC3B	0.852564	0.0134031	0.0903816	up	no
MAP3K8	0.620308	0.0134149	0.0903848	up	no
YPEL4	1.12176	0.0137535	0.0918413	up	no
CD14	1.13114	0.0138034	0.092116	up	no
ALAD	0.582332	0.0139065	0.0925103	up	no
FKBPL	0.590949	0.0146477	0.0953876	up	no
SPHK1	0.9624	0.0147575	0.095924	up	no
TESPA1	0.655774	0.0148103	0.0960162	up	no
RASL11A	0.967615	0.0151007	0.097215	up	no
CDIP1	0.581424	0.015275	0.0978346	up	no
RELL2	0.751914	0.0153433	0.0982121	up	no
SLC7A7	0.699786	0.0155421	0.0992426	up	no
RXRA	0.719144	0.0157504	0.0999344	up	no
HSBP1L1	0.715552	0.0159141	0.100639	up	no
ECE1	0.801031	0.0159299	0.100677	up	no
44447	0.70101	0.0159393	0.100677	up	no
SPNS3	0.870489	0.0159901	0.100938	up	no
B3GNT5	0.919548	0.0163052	0.102312	up	no
SCHIP1	0.957772	0.0163728	0.102491	up	no
LRRC61	1.08745	0.0164141	0.102627	up	no
LACTB2	0.825166	0.0164725	0.10266	up	yes
BTBD19	0.700179	0.0166041	0.103323	up	no
MAN1A1	0.677017	0.0168063	0.104088	up	no
STOM	0.811148	0.0169518	0.104625	up	no
MINPP1	1.00025	0.0170314	0.104987	up	no
CD302	0.683768	0.0171453	0.105327	up	no
PTPRJ	0.745204	0.0171885	0.10546	up	no
RUNX2	0.988814	0.0173931	0.106591	up	no
SCD	0.86791	0.0176727	0.107645	up	no
SLC15A3	0.605803	0.0178093	0.108056	up	no
RIDA	0.630575	0.0179185	0.108398	up	no
HAGH	0.656048	0.0180487	0.109019	up	no
GMPR	1.21585	0.0181125	0.109278	up	no
AVPI1	0.802348	0.0184036	0.110338	up	no
RNASE6	0.974982	0.0185247	0.110747	up	yes
CSF3R	0.849809	0.0186625	0.111318	up	no
CACNA2D2	0.80304	0.0186934	0.111439	up	no
SPON2	0.9147	0.0187374	0.11155	up	no
ODF3B	1.07139	0.0188201	0.111877	up	no
MEST	0.810997	0.018967	0.112559	up	no
PYCR3	0.589237	0.019314	0.114011	up	no
IMPA2	0.683722	0.0193233	0.114011	up	no
BICDL1	0.853616	0.0193951	0.11426	up	no
ANK1	1.1616	0.0194076	0.11427	up	no
TOB1	0.698222	0.0200006	0.116845	up	no
ISG15	0.962858	0.0202244	0.117297	up	no
NOTCH2	0.600582	0.0202361	0.117297	up	no
MYEF2	1.18763	0.0204201	0.117853	up	no
JMY	0.799676	0.0207708	0.118834	up	no
CKAP4	0.751637	0.0209062	0.119155	up	no
GRIK5	0.699674	0.0209445	0.119211	up	no
TNF	1.06069	0.0211541	0.119766	up	no
GGT7	0.755969	0.0211734	0.119766	up	no
PDE4A	0.934469	0.0213851	0.120546	up	no
ANXA9	0.640428	0.0214833	0.120803	up	no
OCIAD2	0.6506	0.0217365	0.121641	up	no
SNAI3	0.679145	0.021935	0.122296	up	no
RAB11FIP5	0.97731	0.0226867	0.124569	up	no
MFSD3	0.591578	0.022708	0.124621	up	no
INSL3	0.7661	0.0227372	0.124684	up	no
NINJ1	0.611179	0.0229306	0.125254	up	no
CPOX	0.705425	0.0234131	0.127128	up	yes
LRP1	0.881557	0.0237171	0.12814	up	no
IRAK2	0.727906	0.0239445	0.128849	up	no
GALNT11	0.742811	0.0241033	0.129323	up	no
HLX	0.655309	0.0241796	0.129451	up	no
IFRD1	0.72315	0.0246992	0.131297	up	no
GPR162	1.03772	0.0247995	0.131629	up	no
S100A6	0.719751	0.0249126	0.13183	up	no
ATXN1	0.821672	0.0253763	0.133525	up	no
MLC1	0.792499	0.0256889	0.13418	up	yes
HBQ1	1.28487	0.0258422	0.134276	up	no
SMOX	0.757505	0.0258047	0.134276	up	no
PACSIN3	0.786163	0.0261717	0.13527	up	no
DLL1	0.973992	0.026546	0.136604	up	no
FOSB	0.996761	0.0266414	0.136909	up	no
BAALC	1.03473	0.0270437	0.138	up	no
ERFE	1.09342	0.0274708	0.139406	up	no
CTSL	0.996873	0.0275287	0.139489	up	no
NECTIN1	0.928133	0.0276228	0.139654	up	no
KDM6B	0.752641	0.0276542	0.139654	up	no
SPACA9	0.663049	0.0280727	0.140886	up	no
COX8C	0.957978	0.0281426	0.141087	up	no
CYB561	0.644166	0.0284865	0.142419	up	no
TUBB4B	0.585122	0.0288521	0.143509	up	no
MICAL2	1.04454	0.0288685	0.143509	up	no
TMEM63B	0.612692	0.0291574	0.143991	up	no
MNS1	0.581634	0.0291876	0.144073	up	yes
FAM102A	0.707362	0.0296418	0.145562	up	no
GPR183	0.846117	0.0301555	0.14719	up	no
ITGAM	0.803623	0.0302539	0.147465	up	no
PMEPA1	0.994975	0.0302513	0.147465	up	no
DUSP1	0.654839	0.0310193	0.150134	up	no
CMBL	0.682104	0.0317426	0.151833	up	no
TMEM71	0.668337	0.0320529	0.152423	up	no
NEK3	0.649347	0.0320747	0.152423	up	no
STAMBPL1	0.670609	0.0325085	0.153539	up	no
FOSL1	1.05437	0.032798	0.15442	up	no
TMEM170B	0.596908	0.0331088	0.155356	up	no
PANX2	0.916837	0.0334487	0.156362	up	no
ODF2L	0.667682	0.0335622	0.156606	up	no
FAXDC2	0.920428	0.0343622	0.158865	up	no
NLGN2	0.691705	0.0355099	0.162549	up	no
ZEB1	0.62808	0.0356375	0.162755	up	no
SLC6A9	0.979083	0.0357281	0.16302	up	no
NFE2L3	0.68002	0.035742	0.16302	up	no
CAMK1	0.67502	0.0362927	0.164602	up	no
EXOSC4	0.591324	0.0366766	0.165479	up	no
NPDC1	0.892023	0.0370522	0.166549	up	no
VCAN	1.13882	0.0375148	0.167612	up	no
PLD4	0.656763	0.037606	0.167734	up	no
DMTN	1.17847	0.038021	0.168478	up	no
GABARAPL1	0.792871	0.0381239	0.168688	up	no
FN3K	0.596073	0.0386793	0.170404	up	no
ARL4A	0.883952	0.0389057	0.170918	up	no
TSPAN32	0.689896	0.0394591	0.172269	up	no
IRS2	0.742431	0.0402232	0.174516	up	no
CD4	0.83527	0.0403109	0.174565	up	yes
TRIB3	0.940826	0.0402859	0.174565	up	no
CXCL16	0.744332	0.0405073	0.174919	up	no
ANO9	0.777615	0.0409877	0.175909	up	no
STAT4	0.82977	0.0414423	0.176763	up	no
PLAUR	0.660039	0.0426109	0.179537	up	no
SLC30A1	0.580836	0.0429616	0.18058	up	no
TMCC2	1.11577	0.0432255	0.181326	up	no
MAPK12	0.684244	0.0433077	0.181492	up	no
F2R	0.736662	0.0457268	0.186893	up	no
RHD	1.12482	0.0460625	0.187681	up	yes
PDF	0.602126	0.0464959	0.188493	up	no
SPIB	0.800597	0.0466801	0.188806	up	no
SORT1	0.765549	0.0467308	0.188865	up	no
SOCS1	0.866577	0.0468873	0.188988	up	no
BCL2L11	0.649468	0.0480093	0.191672	up	no
TTC9	0.746428	0.0480437	0.191737	up	no
RHOBTB3	0.735246	0.0488153	0.193712	up	no
CCN3	1.25846	0.0497933	0.196406	up	no
LRRC20	0.596135	0.0499297	0.196718	up	no
EBF1	-1.33174	3.32439e-13	2.90995e-10	down	no
LEF1	-1.58084	6.85672e-13	5.54023e-10	down	no
RGL1	-1.80781	3.16294e-10	1.32894e-07	down	no
JAKMIP2	-2.52041	1.60299e-09	5.10236e-07	down	no
TMEM263	-1.07714	2.26569e-09	6.99965e-07	down	no
STIM2	-1.47344	7.07217e-09	1.76872e-06	down	no
EPHA7	-2.85563	9.97599e-09	2.43693e-06	down	no
FAM111B	-1.69838	2.34876e-08	5.36333e-06	down	no
PI4K2B	-0.78063	3.61614e-08	7.59679e-06	down	no
MEF2C	-1.1009	4.07276e-08	8.38829e-06	down	yes
BARD1	-1.01408	6.27172e-08	1.1764e-05	down	no
TIAM2	-1.60309	6.5388e-08	1.20498e-05	down	no
MTMR4	-0.595291	8.98387e-08	1.62701e-05	down	no
SYNE3	-0.987984	1.75584e-07	3.02349e-05	down	yes
ZGRF1	-1.08537	1.83028e-07	3.02422e-05	down	no
DMC1	-1.76729	2.0605e-07	3.32976e-05	down	no
CEP112	-1.68436	2.3044e-07	3.61275e-05	down	no
KIAA0391	-0.893374	4.59933e-07	6.52856e-05	down	no
SMC6	-0.961829	4.87825e-07	6.65469e-05	down	no
DYNC2H1	-1.95749	1.51689e-06	0.000181062	down	no
MMS22L	-0.925243	1.55852e-06	0.000181896	down	no
TIAM1	-1.09423	1.69923e-06	0.000191922	down	no
P4HA2	-1.745	1.72508e-06	0.000192769	down	no
TRIM44	-0.59434	1.94615e-06	0.000206488	down	no
GABPA	-0.703411	2.02044e-06	0.000212	down	no
N4BP2	-0.712989	2.06612e-06	0.00021277	down	no
CDK6	-0.931983	3.15295e-06	0.000306653	down	no
GNB4	-0.7805	3.56106e-06	0.000331021	down	no
CEP128	-0.874324	4.24541e-06	0.000384429	down	no
CBX5	-0.749849	4.8292e-06	0.000422706	down	no
SSH2	-0.764189	4.8287e-06	0.000422706	down	no
ARHGEF4	-2.97368	5.11223e-06	0.000440155	down	no
DEK	-0.639273	5.17509e-06	0.000441945	down	no
MEGF6	-1.14292	6.23921e-06	0.000516037	down	no
MSI2	-0.811815	7.88411e-06	0.000617079	down	no
MDM2	-1.03529	9.29338e-06	0.000712538	down	no
TCF4	-1.14427	1.02721e-05	0.000781873	down	no
SYNJ2BP	-0.785227	1.13661e-05	0.000852783	down	no
ZCCHC7	-0.827578	1.21609e-05	0.000887072	down	no
TOP2B	-0.750582	1.32656e-05	0.000947904	down	no
ARHGAP5	-0.833186	1.51983e-05	0.00105028	down	no
LRRC8C	-0.729177	1.63701e-05	0.00109523	down	no
MEF2A	-0.68229	1.62281e-05	0.00109523	down	no
GINS3	-0.962519	1.60713e-05	0.00109523	down	no
NEMP2	-0.652528	1.69647e-05	0.00112783	down	no
NMT2	-0.872114	1.73115e-05	0.00114365	down	no
CD1C	-1.99343	1.75326e-05	0.00115102	down	no
FUT8	-0.762283	1.79092e-05	0.00116844	down	no
SGCB	-1.89858	1.9384e-05	0.00123341	down	no
FBXL4	-0.694683	1.95173e-05	0.00123341	down	no
KATNAL1	-0.731905	1.96095e-05	0.00123341	down	no
FAM111A	-0.753592	2.07924e-05	0.00127721	down	no
BRIP1	-1.08427	2.07257e-05	0.00127721	down	no
KIF16B	-0.695789	2.12467e-05	0.00129753	down	no
SUN1	-0.611932	2.18477e-05	0.00131136	down	no
YPEL1	-0.768776	2.28141e-05	0.00134629	down	no
ARPP21	-1.73912	2.32633e-05	0.00135721	down	no
ZNF736	-0.686644	2.35167e-05	0.00135725	down	no
GLI3	-2.07788	2.41039e-05	0.00137602	down	no
ZNF624	-0.871285	2.55972e-05	0.00143682	down	no
VSIG10	-0.991383	2.72455e-05	0.00147519	down	no
SMAD2	-0.582552	2.74665e-05	0.00147953	down	no
ATXN3	-0.594208	2.85266e-05	0.00151335	down	no
BRCA2	-0.919945	3.07397e-05	0.00159059	down	no
GEN1	-0.805013	3.22998e-05	0.00164697	down	no
KNTC1	-0.783724	3.27416e-05	0.00166144	down	no
GSTCD	-0.620913	3.42207e-05	0.00171988	down	no
LRIG1	-1.31275	3.47617e-05	0.00173051	down	no
HACE1	-0.622651	3.5905e-05	0.00176422	down	no
WASHC4	-0.631084	3.59427e-05	0.00176422	down	no
BTBD11	-1.35444	3.61644e-05	0.00176684	down	no
AC005747.1	-0.938797	3.65048e-05	0.00177522	down	no
ELMOD2	-0.669278	3.83111e-05	0.00183624	down	no
CARHSP1	-0.715857	3.86338e-05	0.00183624	down	no
ACSF2	-0.630207	3.85277e-05	0.00183624	down	no
TMEM217	-1.14692	3.96729e-05	0.00187714	down	no
UFL1	-0.593993	4.12536e-05	0.00194318	down	no
APBB1IP	-0.654039	4.32741e-05	0.00198343	down	no
GPRIN1	-1.19894	4.62392e-05	0.00207563	down	no
SIGLEC15	-1.94855	5.04482e-05	0.00221719	down	no
ALG10	-0.740941	5.16038e-05	0.00225853	down	no
SH3RF3	-1.36537	5.60071e-05	0.00240492	down	no
LIMS2	-1.48789	5.60935e-05	0.00240492	down	no
DPYSL2	-0.957984	5.72911e-05	0.00243911	down	no
PARD3	-1.23505	5.78552e-05	0.00243911	down	no
PXDN	-0.960936	6.2579e-05	0.00258791	down	no
ZC3H12D	-0.800096	6.60802e-05	0.00269033	down	no
COL5A1	-1.3329	6.67091e-05	0.00270545	down	no
SLC30A4	-1.25652	7.01941e-05	0.00278345	down	no
ZNF217	-0.588825	7.79127e-05	0.00303127	down	no
TEP1	-0.651549	7.85861e-05	0.00304601	down	no
MYB	-0.817814	8.68312e-05	0.00328466	down	no
DICER1	-0.601902	8.86864e-05	0.00330341	down	no
NAV1	-1.01821	9.04068e-05	0.0033204	down	no
HELLS	-0.921658	8.99771e-05	0.0033204	down	no
NRP1	-1.95209	9.39608e-05	0.00342696	down	no
NR3C1	-0.755298	9.60995e-05	0.00346634	down	no
ANGPTL2	-1.94603	9.61926e-05	0.00346634	down	no
ATM	-0.639535	9.57913e-05	0.00346634	down	no
DIPK1C	-2.06165	9.63606e-05	0.00346634	down	no
RTTN	-0.586572	0.000100333	0.00358468	down	no
PARP2	-0.636639	0.000101162	0.00360207	down	no
TENM4	-2.12292	0.000102975	0.00364191	down	no
LCN10	-1.83954	0.000105324	0.00366331	down	no
UBASH3B	-0.867849	0.000107409	0.00371127	down	no
C19orf57	-1.19766	0.000119297	0.00397808	down	no
QRSL1	-0.836041	0.000122936	0.00407406	down	no
SMC1B	-2.16024	0.00012313	0.00407406	down	no
TLR1	-0.720608	0.000129313	0.00420529	down	no
BANK1	-0.989076	0.000130035	0.00421569	down	no
PAX5	-0.738309	0.000130892	0.00422728	down	no
LPP	-0.638804	0.000136718	0.00435178	down	no
BTBD3	-0.933084	0.000147059	0.00461106	down	no
MOB3B	-0.931635	0.000160208	0.0049062	down	no
USP49	-0.649829	0.000176929	0.00530989	down	no
INSR	-0.851509	0.000182185	0.00539061	down	no
E2F2	-0.964848	0.000198931	0.00574057	down	no
CECR2	-1.89361	0.000199642	0.0057453	down	yes
TRIM38	-0.615615	0.00020871	0.0059251	down	no
LCN6	-1.68603	0.000209808	0.00594023	down	no
TIMELESS	-0.794357	0.000225902	0.00624441	down	no
CCND3	-0.698789	0.000228044	0.00628708	down	no
SMC4	-0.630528	0.000237798	0.00652176	down	no
ARHGAP29	-2.25627	0.000239834	0.00656045	down	no
GMFB	-0.746202	0.000241291	0.00656612	down	no
ZNF519	-0.721627	0.000256932	0.00688473	down	no
REEP3	-0.750508	0.000262175	0.00694008	down	no
ZNF367	-0.852042	0.000287505	0.00738375	down	no
MGAT4A	-0.730097	0.000294862	0.00749936	down	no
BMP2K	-0.682547	0.000297987	0.00756053	down	no
FAM135A	-0.664549	0.000303759	0.00765152	down	no
CHAF1B	-0.778006	0.000303119	0.00765152	down	no
MME	-1.29565	0.00032285	0.00805513	down	no
WDFY3	-1.14994	0.000326661	0.00809256	down	no
KIF24	-0.91158	0.000333074	0.00819347	down	no
LILRA2	-0.894143	0.000338474	0.00828749	down	no
CASP8AP2	-0.646222	0.00034185	0.00831228	down	no
SHROOM3	-2.15291	0.000369699	0.00883782	down	no
PPFIBP1	-0.75773	0.00037933	0.00895389	down	no
TLR6	-0.934499	0.000381219	0.00897832	down	no
FOLR2	-1.45425	0.00038348	0.00899254	down	yes
ZNF699	-0.635407	0.000394985	0.00914836	down	no
BVES	-1.41976	0.000402993	0.00928298	down	no
ATAD5	-0.643114	0.000409844	0.00939956	down	no
AUTS2	-0.766407	0.000433279	0.00972334	down	no
GRAMD4	-0.827623	0.000440787	0.00985112	down	no
CCDC150	-0.956567	0.00044716	0.00995121	down	no
ZFP28	-0.802342	0.000474442	0.010404	down	no
KIRREL1	-1.288	0.00047587	0.0104136	down	no
LRMP	-0.836849	0.000495364	0.0106625	down	no
LDLRAD4	-0.711205	0.000517466	0.0110702	down	no
CAMK2D	-1.01706	0.000538219	0.0114211	down	no
PIK3CG	-0.673728	0.000550694	0.0115922	down	no
PLAG1	-1.26209	0.000549645	0.0115922	down	no
FANCI	-0.690581	0.000550595	0.0115922	down	no
NT5DC1	-0.671369	0.000554475	0.0116252	down	no
CAMSAP2	-1.43878	0.000556863	0.011652	down	no
ITGA4	-0.595965	0.000571609	0.011796	down	no
UBL3	-0.760759	0.000581586	0.0119784	down	no
MCUB	-0.700598	0.000585354	0.0119953	down	no
RAPGEF5	-1.60887	0.000584946	0.0119953	down	no
RFC5	-0.650696	0.00058937	0.0120327	down	no
MYO7B	-1.56953	0.000607103	0.0121467	down	no
NRIP1	-0.819197	0.000602976	0.0121467	down	no
CDCA7	-0.923912	0.000640725	0.0126554	down	no
PTK2	-0.80833	0.000666539	0.0129845	down	no
RELL1	-1.22793	0.000697288	0.0133655	down	no
RAG1	-1.35774	0.000704331	0.0134027	down	no
AC107871.1	-0.720289	0.000730389	0.0137491	down	no
RBL1	-0.590975	0.000729439	0.0137491	down	no
DIAPH3	-0.919886	0.000739363	0.0138683	down	no
HDAC9	-0.776639	0.000775599	0.0143938	down	no
ITIH3	-1.51672	0.000784343	0.0145048	down	no
SETD7	-0.726444	0.000793688	0.0146005	down	no
OGFRL1	-0.73086	0.000818906	0.0149857	down	no
CLECL1	-1.60989	0.000837744	0.0152772	down	no
SLC35E3	-0.895666	0.000884688	0.015873	down	no
TBC1D16	-0.963756	0.000894455	0.0159785	down	no
PLK4	-0.827876	0.000900511	0.0160321	down	no
C5orf34	-0.716374	0.000912501	0.0161907	down	no
SPRED1	-1.30583	0.000993538	0.0171647	down	no
CD24	-0.936832	0.00103178	0.017657	down	no
KCTD12	-1.12833	0.00103085	0.017657	down	no
C1orf112	-0.617684	0.00107451	0.0181458	down	no
BMP2	-1.53773	0.00109109	0.0183666	down	no
ACVR2B	-0.905894	0.00113772	0.0190297	down	no
ATAD2	-0.662476	0.00114331	0.0190375	down	no
ARHGAP42	-1.11226	0.001147	0.0190375	down	no
MS4A1	-1.44553	0.00117744	0.0194769	down	no
NPY	-1.56678	0.0012306	0.0202223	down	no
ALDH7A1	-0.844967	0.00124005	0.0202756	down	no
WDR76	-0.696355	0.00124116	0.0202756	down	no
TMEM236	-1.44967	0.00129322	0.0208663	down	no
MRTFB	-0.591611	0.0013103	0.0210772	down	no
CHURC1	-0.60572	0.00134563	0.021416	down	no
LRP8	-0.670296	0.00136537	0.0215992	down	no
CHEK1	-0.67538	0.00139436	0.0219257	down	no
C12orf75	-0.801232	0.00143024	0.0222567	down	no
NCAPG2	-0.663463	0.00146122	0.0225687	down	no
PDGFA	-1.48419	0.00152915	0.023259	down	no
SPTLC2	-0.696906	0.0015477	0.0234928	down	no
WDHD1	-0.72986	0.00157198	0.0237797	down	no
ETS2	-0.870953	0.00161703	0.0243342	down	no
CYB5A	-1.03926	0.00163106	0.0244402	down	no
DTL	-0.827453	0.00172214	0.0255043	down	no
TIFA	-0.790911	0.00179324	0.0262423	down	no
ZNF730	-0.845407	0.00187629	0.0271094	down	no
CSRP2	-0.872298	0.0018881	0.0271572	down	no
BRCA1	-0.825287	0.00189842	0.0271675	down	yes
KAZALD1	-1.15615	0.00200067	0.0282081	down	no
PHLPP1	-0.610991	0.00204726	0.0285942	down	no
ZNF114	-1.04924	0.00204486	0.0285942	down	no
ZNF441	-0.714427	0.00208244	0.0288575	down	no
IQGAP3	-0.916645	0.0020975	0.0289054	down	no
GRID2IP	-0.887815	0.00209966	0.0289054	down	no
CD9	-1.13184	0.00209674	0.0289054	down	no
CELSR1	-1.13809	0.00209816	0.0289054	down	no
GLDC	-0.933392	0.00221301	0.030033	down	no
SMC2	-0.713149	0.00221667	0.0300437	down	no
MYO10	-1.65665	0.00222118	0.030066	down	no
PLVAP	-1.3252	0.00225553	0.030382	down	no
DTX4	-1.1262	0.0023258	0.0310028	down	yes
NDC80	-0.645815	0.00239125	0.0314758	down	no
HVCN1	-0.775804	0.00243393	0.0316841	down	no
HDHD2	-0.592777	0.0024326	0.0316841	down	no
RAD51AP1	-0.827208	0.0024541	0.0317137	down	no
SDK1	-1.49938	0.00246822	0.0318112	down	no
UHRF1	-0.813615	0.00251854	0.0321053	down	no
SOCS2	-0.749729	0.00259922	0.0328151	down	no
KNL1	-0.715009	0.00274782	0.0338371	down	yes
ARAP2	-0.618142	0.00283075	0.0344596	down	no
DAAM1	-0.685578	0.00292308	0.0354141	down	no
FIGNL1	-0.636477	0.00293329	0.0354969	down	no
FAM3C	-0.73287	0.00298172	0.036	down	no
FAM129C	-0.764751	0.0031343	0.0371636	down	no
PLEKHG1	-1.09412	0.00318655	0.0374821	down	no
SPTBN1	-0.593707	0.00322414	0.0378284	down	no
DHFR	-0.746604	0.00326437	0.0380566	down	no
ASPM	-0.829212	0.00327434	0.0381305	down	no
CDC45	-0.801338	0.00329756	0.0383583	down	no
TRIM2	-1.05304	0.00347513	0.0395908	down	no
LGMN	-0.912934	0.00351941	0.0400086	down	no
PUS10	-0.681308	0.00356785	0.0404195	down	no
RECK	-0.58465	0.00368469	0.0411963	down	no
ECM2	-1.35055	0.00376025	0.0416642	down	no
KIF11	-0.753949	0.00379122	0.041787	down	no
KHDC1	-0.751487	0.00383589	0.0421459	down	no
BCL7A	-0.600396	0.00389753	0.0424706	down	no
DSG2	-1.70948	0.00391882	0.0425681	down	no
SLC2A5	-0.955782	0.00393752	0.042727	down	no
E2F1	-0.75705	0.00395711	0.0428671	down	no
PARP15	-0.740212	0.0040117	0.0431751	down	no
ZNF443	-0.583652	0.00416644	0.0441904	down	no
APCDD1	-1.03523	0.00421424	0.0442222	down	no
CD109	-0.951735	0.00436849	0.0452241	down	no
POGLUT3	-0.646052	0.00437861	0.0452241	down	no
NFATC4	-2.0769	0.00445937	0.0457881	down	no
ZC3H12C	-1.37481	0.0044912	0.0459745	down	no
KLF11	-1.15231	0.00452057	0.046101	down	no
CEP55	-0.874807	0.00452966	0.046149	down	no
GPR137C	-0.658656	0.00454343	0.0461549	down	no
SLC16A14	-1.01337	0.00455081	0.0461853	down	no
PLEKHA5	-0.864286	0.00463576	0.0467313	down	no
SLAIN1	-0.58109	0.00480977	0.047815	down	no
ZNF704	-0.762701	0.00492479	0.0486925	down	no
CBLN3	-0.882365	0.00496144	0.0488596	down	no
PTPN14	-1.74373	0.00499731	0.0491036	down	no
CHST15	-0.82133	0.0050271	0.0493041	down	no
MTUS2	-1.20041	0.00503606	0.0493459	down	yes
GPR176	-1.71366	0.00505407	0.0494017	down	no
MCM10	-0.77774	0.00513673	0.049921	down	no
UGT3A2	-1.38568	0.00518449	0.0501648	down	no
EMP2	-1.29665	0.00520929	0.0502927	down	no
C5	-0.58973	0.0053091	0.0510217	down	no
EZR	-0.849301	0.00540292	0.0515461	down	no
LIMD1	-0.584612	0.00543624	0.0516986	down	no
CRIM1	-0.775867	0.00555105	0.0522732	down	no
EXT1	-1.14481	0.00555876	0.0522732	down	no
MRVI1	-1.09104	0.00555584	0.0522732	down	no
GAS2L3	-0.993378	0.00569647	0.052952	down	no
ZNF318	-0.644568	0.00587886	0.0540482	down	no
PTGDR	-1.21605	0.00588498	0.0540482	down	no
RNF141	-0.627789	0.00596534	0.0545343	down	no
FZD8	-1.16682	0.00607916	0.055296	down	no
GCSAM	-0.906358	0.00612209	0.0553888	down	no
JMJD1C	-0.683567	0.00614893	0.0554882	down	no
KCTD15	-0.62654	0.00616789	0.0555639	down	no
CAMK1D	-0.592339	0.00617618	0.0555817	down	no
SCN4A	-1.33531	0.00624784	0.0560438	down	no
GPR135	-0.693247	0.0064205	0.0569227	down	no
MND1	-0.67907	0.0065175	0.0575777	down	no
TCF19	-0.617812	0.00652765	0.0575887	down	no
USP28	-0.599229	0.00657728	0.0577656	down	no
CD22	-0.666992	0.00664787	0.0580455	down	no
NRXN3	-1.29346	0.00675225	0.0585678	down	no
POLQ	-0.738219	0.00687702	0.0593309	down	no
SIK1	-1.57009	0.00687977	0.0593309	down	no
TOP2A	-0.849539	0.0069669	0.0597896	down	no
GRK3	-0.599954	0.00702159	0.0600609	down	no
TMEM8B	-0.583163	0.00719532	0.0609513	down	no
LILRB1	-0.672221	0.00745743	0.0622678	down	no
AFF3	-0.651113	0.00756597	0.0629738	down	no
MYBL2	-0.769561	0.00762529	0.0633045	down	no
FMNL3	-0.663951	0.00766784	0.0634749	down	no
GALNT3	-0.961375	0.00789837	0.0645759	down	no
PTCH1	-1.39474	0.00822054	0.066422	down	no
AXIN2	-1.02112	0.00847361	0.0678034	down	no
ZNF469	-0.999486	0.00873265	0.0692656	down	no
ZNF354C	-0.8837	0.00891999	0.0702893	down	no
FHIT	-0.773172	0.00936851	0.0724112	down	no
CIT	-0.68055	0.00948711	0.0729639	down	no
INO80C	-0.715016	0.00982903	0.0746523	down	no
USP41	-1.01494	0.00982666	0.0746523	down	no
GNAZ	-1.05547	0.00992495	0.0752052	down	no
ALG10B	-0.636222	0.0101329	0.0762772	down	no
SGSH	-0.684704	0.0101694	0.0762772	down	no
KANK2	-0.826114	0.0101737	0.0762772	down	no
RPL39L	-0.855661	0.0105558	0.0780835	down	no
NID2	-1.21281	0.0112262	0.081045	down	no
TAPT1	-0.586056	0.0113278	0.0812597	down	no
FAM20C	-0.998557	0.0113934	0.081523	down	no
FRMD4B	-0.675099	0.0115161	0.0820659	down	no
VPREB1	-1.10275	0.0116749	0.0828603	down	no
FLT3	-0.773668	0.0116975	0.0829646	down	no
CKAP2L	-0.65184	0.0119099	0.0840172	down	no
AKAP12	-1.44304	0.0123775	0.0858346	down	no
AFDN	-0.826068	0.0124209	0.0859926	down	no
TP53I11	-0.69615	0.0125414	0.0865537	down	no
PCLO	-1.54247	0.0128121	0.0877304	down	no
HMHB1	-0.803776	0.0129026	0.0880869	down	no
CHML	-0.591299	0.0130634	0.0887438	down	no
FAM174B	-0.970759	0.0130868	0.0887438	down	no
C19orf18	-0.608144	0.0133862	0.0903657	down	no
SLC15A2	-0.632054	0.0134396	0.0904441	down	no
NGFR	-1.42943	0.0134549	0.0904441	down	no
XRCC2	-0.701162	0.0135144	0.0905904	down	no
CLSPN	-0.59826	0.0135754	0.0909415	down	no
SHCBP1	-0.660072	0.0135872	0.0909623	down	no
SUPT3H	-0.63621	0.0136596	0.0913308	down	no
CRY1	-0.60812	0.0136799	0.091408	down	no
EXOC6B	-0.753564	0.0139235	0.092565	down	no
GINS2	-0.643278	0.0140283	0.0928144	down	no
CDC6	-0.584261	0.0142409	0.0940202	down	no
LRRC1	-0.75279	0.0145056	0.0950513	down	no
CCN2	-0.996219	0.0145225	0.0951026	down	no
RIN2	-0.811696	0.014541	0.0951641	down	no
ARL17A	-0.659035	0.014565	0.0952238	down	no
ADARB2	-1.07645	0.0146299	0.0953876	down	no
CLDN12	-0.661924	0.0148174	0.0960162	down	no
SMIM14	-0.624984	0.0152	0.0975924	down	no
DOK4	-0.65816	0.0151858	0.0975924	down	no
LY6G5C	-0.69638	0.0152396	0.0976672	down	no
ASAP2	-0.675513	0.0155967	0.0994102	down	no
BACH2	-0.60542	0.0157646	0.0999344	down	no
AASS	-0.928151	0.0157493	0.0999344	down	no
WDR62	-0.588402	0.0160161	0.101041	down	no
ZNF793	-0.780929	0.0162363	0.102062	down	no
FAM49A	-0.604196	0.0163669	0.102491	down	yes
TYMS	-0.63181	0.016675	0.10358	down	no
RCAN1	-0.741464	0.0167424	0.103938	down	no
EME1	-0.610719	0.0170719	0.105132	down	no
TOX2	-1.0186	0.017381	0.106579	down	no
MRC1	-0.986544	0.0178	0.108056	down	no
MEI1	-0.790015	0.0180119	0.108859	down	no
DENND3	-0.604127	0.0182023	0.109569	down	no
ETV5	-0.94152	0.0186473	0.111291	down	no
RTP5	-1.18177	0.0187545	0.11155	down	no
FMNL2	-0.72567	0.0196787	0.115737	down	no
LRFN2	-1.33066	0.0197344	0.11587	down	no
CDK14	-0.777156	0.0200801	0.117048	down	no
LGALS3BP	-0.624727	0.020244	0.117297	down	yes
MILR1	-0.599913	0.0205383	0.118405	down	no
C18orf54	-0.597331	0.0205355	0.118405	down	no
LOXHD1	-1.35163	0.0206844	0.118744	down	yes
ZNF423	-0.588542	0.0220408	0.122631	down	no
USP43	-0.589701	0.0221009	0.12287	down	no
EPHB3	-1.22831	0.0223259	0.123515	down	no
PCCA	-0.803841	0.0223654	0.123515	down	no
EXO1	-0.607688	0.0228537	0.124964	down	no
APOLD1	-0.745631	0.0239248	0.128843	down	no
NIPSNAP3B	-0.631133	0.024257	0.12968	down	no
HRK	-1.06019	0.0247244	0.131297	down	no
NCAPG	-0.599029	0.0248878	0.131765	down	no
CKLF	-0.617926	0.0250826	0.132529	down	no
SYT11	-0.681256	0.0252468	0.133196	down	no
KLF7	-0.595019	0.0253334	0.133525	down	no
PCDHGA11	-0.902195	0.0253745	0.133525	down	no
ACBD7	-0.69119	0.0257296	0.134276	down	no
CORO6	-0.611253	0.0257756	0.134276	down	no
PON2	-0.976602	0.0259173	0.134371	down	no
PDE9A	-1.03998	0.0259957	0.134711	down	no
ZNF471	-0.828427	0.0264012	0.13614	down	no
CTTNBP2NL	-0.669727	0.026668	0.136978	down	no
DOCK1	-1.48089	0.0269201	0.137676	down	no
TMEM237	-0.615605	0.027341	0.139075	down	no
IGLL5	-1.25364	0.027499	0.139406	down	no
DDIAS	-0.630956	0.0276525	0.139654	down	no
CCL28	-0.839947	0.0277836	0.14003	down	no
MYO1B	-0.851761	0.0284015	0.142129	down	no
OVCH2	-1.20383	0.0289814	0.143712	down	no
ESCO2	-0.635747	0.0295492	0.145404	down	yes
TSPAN9	-0.92193	0.0296148	0.14555	down	no
BCAT1	-0.712454	0.0298676	0.146534	down	no
ARL17B	-0.673318	0.0307585	0.149301	down	no
TCL1A	-0.82812	0.0310136	0.150134	down	no
KIF26A	-0.87444	0.031153	0.150451	down	no
TRIM46	-0.626026	0.0313854	0.151087	down	no
TMEM273	-0.85994	0.0315271	0.151248	down	no
FGFR1	-0.828109	0.031911	0.152291	down	no
ICOSLG	-0.998005	0.0320038	0.152423	down	no
NLRP12	-0.869666	0.0322162	0.152638	down	no
AC092835.1	-0.591354	0.0325428	0.153562	down	no
NBEA	-0.860537	0.0327855	0.15442	down	no
PCDHGB7	-0.861214	0.0330855	0.155356	down	no
MKI67	-0.5957	0.0335176	0.156489	down	no
TMEM136	-1.22972	0.0335756	0.156606	down	no
SLC6A16	-0.686762	0.0336599	0.156831	down	no
CDC25A	-0.581767	0.0337808	0.157215	down	no
ZNF772	-0.638131	0.0338748	0.157512	down	no
PCDH9	-1.14409	0.0341927	0.158385	down	no
PLEKHG4B	-1.04312	0.0344132	0.15896	down	no
WDR49	-0.742659	0.034467	0.159069	down	no
SERPINI2	-0.912138	0.0348267	0.160166	down	no
ZFP3	-0.582521	0.0348867	0.160372	down	no
DUSP26	-0.986469	0.0349575	0.160604	down	no
EFNB2	-0.974725	0.0349677	0.160604	down	no
KCNK12	-0.895659	0.0355225	0.162549	down	no
CIDEB	-0.83975	0.0355461	0.162549	down	no
ERBB2	-0.583933	0.0357609	0.163035	down	no
TXNIP	-0.584345	0.0370679	0.166549	down	no
NEIL1	-0.739621	0.0371228	0.166666	down	no
PIMREG	-0.775659	0.0371671	0.166699	down	no
ADGRG1	-0.610835	0.0374373	0.167408	down	no
GINS1	-0.631615	0.038064	0.16856	down	no
MELTF	-0.729446	0.0391957	0.171618	down	no
E2F7	-0.63856	0.0403319	0.174565	down	no
TICRR	-0.637499	0.0403928	0.174675	down	no
LRATD2	-0.762074	0.040632	0.175271	down	no
FERMT2	-0.932868	0.0411779	0.176205	down	yes
CCL17	-1.66518	0.0412644	0.17634	down	no
CLEC14A	-1.22402	0.0413361	0.176551	down	no
SDK2	-0.71494	0.0415599	0.176882	down	no
SV2A	-0.601122	0.0421305	0.178582	down	no
RIMS3	-0.78202	0.0424615	0.179267	down	no
SPRY4	-1.22447	0.042543	0.179323	down	no
TLR10	-0.765884	0.0435946	0.181492	down	no
AFAP1L2	-0.687477	0.0433918	0.181492	down	no
NT5E	-0.784346	0.0450597	0.185349	down	no
MYLK	-0.621631	0.045692	0.186893	down	no
SERHL2	-0.773171	0.0463462	0.188123	down	no
ZNF695	-0.666657	0.0465661	0.188493	down	no

## Sheet: STable 3 Lineage Markers
Supplementary Table 3. Lineage specific markers commonly tested in clinical diagnosis.
B lineage markers	Myeloid markers
CD19	MPO
CD79A	CD33
CD22	ANPEP
MME	ITGAM
MS4A1	FCGR1A
	CD36
	CD14
	FUT4
	TFRC
	ITGB3
	KIT
	ITGA2B

## Sheet: STable 4 GATA Targets
Supplementary Table 4. Genes potentially targeted by GATA family trnascription factors from FIMO analysis.
Motif_ID	Motif_Alt	Target_Gene	Target_Chr	Target_Seq	Start	Stop	Strand	Score	p-value	q-value	Matched_Sequence
MA0140.2	GATA1::TAL1	TMEM204	chr16	1528588-1528788(+)	68	85	-	19.5636	3.73e-09	0.0127	CTTATCTGCAGGGAGCAG
MA0140.2	GATA1::TAL1	TOX4	chr14	21476497-21476697(+)	62	79	+	18.1818	1.14e-07	0.193	CTTATCTGTAAACTGCAG
MA1104.1	GATA6	CHMP6	chr17	80991498-80991698(+)	75	87	+	15.3945	1.8e-07	0.635	AGGAGATAAGAAA
MA0482.1	Gata4	CPOX	chr3	98593623-98593823(-)	86	96	+	15.9828	2.49e-07	0.892	TCTTATCTCCC
MA0140.2	GATA1::TAL1	SMIM24	chr19	3480442-3480642(-)	88	105	+	17.7273	2.54e-07	0.288	CTTATCACGGGGAGGCAG
MA0035.3	Gata1	ESCO2	chr8	27771849-27772049(+)	68	78	+	16.2653	6.74e-07	1	TCCTTATCTGT
MA0140.2	GATA1::TAL1	CCRL2	chr3	46407063-46407263(+)	95	112	+	16.8909	8.6e-07	0.732	CTTATCTCAGAAGGCCAG
MA0036.3	GATA2	CPOX	chr3	98593623-98593823(-)	85	95	+	13.7755	1.04e-06	1	TTCTTATCTCC
MA0036.3	GATA2	CHMP6	chr17	80991498-80991698(+)	76	86	-	13.7755	1.04e-06	1	TTCTTATCTCC
MA0036.3	GATA2	ICAM4	chr19	10286867-10287067(+)	83	93	+	13.7653	1.35e-06	1	TCCTTATCTCT
MA0035.3	Gata1	ICAM4	chr19	10286867-10287067(+)	83	93	+	16.1633	1.35e-06	1	TCCTTATCTCT
MA0140.2	GATA1::TAL1	APOBEC3C	chr22	39013983-39014183(+)	89	106	-	16.4182	1.51e-06	0.987	TTTATCTGTCCTGGGCAG
MA0482.1	Gata4	SNAI1	chr20	49982899-49983099(+)	3	13	-	15.5172	1.71e-06	1	CCTTATCTGCC
MA0482.1	Gata4	NAGK	chr2	71064244-71064444(+)	47	57	-	15.5172	1.71e-06	1	CCTTATCTGCC
MA0140.2	GATA1::TAL1	SFI1	chr22	31488588-31488788(+)	152	169	-	16.2909	1.74e-06	0.987	TTTATCTTCCAGGTGCAG
MA0036.3	GATA2	ESCO2	chr8	27771849-27772049(+)	68	78	+	13.7449	1.96e-06	1	TCCTTATCTGT
MA0035.3	Gata1	CPOX	chr3	98593623-98593823(-)	85	95	+	15.6327	2.2e-06	1	TTCTTATCTCC
MA0035.3	Gata1	CHMP6	chr17	80991498-80991698(+)	76	86	-	15.6327	2.2e-06	1	TTCTTATCTCC
MA0482.1	Gata4	CHMP6	chr17	80991498-80991698(+)	75	85	-	15.3793	2.22e-06	1	TCTTATCTCCT
MA1104.1	GATA6	CPOX	chr3	98593623-98593823(-)	84	96	-	14.7339	2.69e-06	1	GGGAGATAAGAAT
MA0036.3	GATA2	PFDN1	chr5	140303021-140303221(-)	17	27	-	13.6122	2.9e-06	1	TTCTTATCTTT
MA0035.3	Gata1	AP1B1	chr22	29423079-29423279(-)	102	112	-	15.4898	3.01e-06	1	CCCTTATCTGT
MA0036.3	GATA2	ABCB7	chrX	75156632-75156832(-)	111	121	-	13.5714	3.27e-06	1	TTCTTATCTTC
MA0482.1	Gata4	ESCO2	chr8	27771849-27772049(+)	69	79	+	15.2069	3.33e-06	1	CCTTATCTGTC
MA0140.2	GATA1::TAL1	PTMS	chr12	6765416-6765616(+)	7	24	-	15.6	3.43e-06	1	CTTATCTGAGTCAGGCAC
MA0482.1	Gata4	GPAM	chr10	112215277-112215477(-)	30	40	+	15.1552	3.58e-06	1	CCTTATCTCTG
MA0482.1	Gata4	LOXHD1	chr18	46657120-46657320(-)	67	77	-	15.1552	3.58e-06	1	CCTTATCTCTG
MA0036.3	GATA2	CARD11	chr7	3043845-3044045(-)	69	79	+	13.5612	3.64e-06	1	TCCTTATCTTT
MA0036.3	GATA2	NPM1	chr5	171387016-171387216(+)	160	170	-	13.5612	3.64e-06	1	TCCTTATCTTT
MA1104.1	GATA6	PFDN1	chr5	140303021-140303221(-)	16	28	+	14.6055	3.86e-06	1	GAAAGATAAGAAG
MA0140.2	GATA1::TAL1	C16orf58	chr16	31509209-31509409(-)	17	34	-	15.4	4.08e-06	1	CTTATCTCACACAAACAC
MA0140.2	GATA1::TAL1	HIST1H2BB	chr6	26043557-26043757(-)	152	169	+	15.4	4.08e-06	1	GCTATCACTAAGGCGCAG
MA0035.3	Gata1	NANP	chr20	25624075-25624275(-)	16	26	-	14.9796	4.17e-06	1	TGCTTATCTCT
MA0035.3	Gata1	COLQ	chr3	15521651-15521851(-)	163	173	-	14.9796	4.17e-06	1	TGCTTATCTCT
MA0035.3	Gata1	SH2D4B	chr10	80537802-80538002(+)	20	30	+	14.9592	4.42e-06	1	CTCTTATCTGC
MA0036.3	GATA2	GNB5	chr15	52191269-52191469(-)	42	52	-	13.5204	4.56e-06	1	TCCTTATCTTC
MA0482.1	Gata4	ING1	chr13	110712636-110712836(+)	133	143	-	15	4.7e-06	1	CCTTATCTCTT
MA0140.2	GATA1::TAL1	SPI1	chr11	47378476-47378676(-)	102	119	+	15.2182	4.74e-06	1	ACTATCTCCCAGCGGCAG
MA0036.3	GATA2	GPAM	chr10	112215277-112215477(-)	29	39	+	13.4898	5.05e-06	1	GCCTTATCTCT
MA0036.3	GATA2	LOXHD1	chr18	46657120-46657320(-)	68	78	-	13.4898	5.05e-06	1	GCCTTATCTCT
MA0036.3	GATA2	ING1	chr13	110712636-110712836(+)	134	144	-	13.4898	5.05e-06	1	GCCTTATCTCT
MA0036.3	GATA2	PSMC6	chr14	52707072-52707272(+)	160	170	-	13.4898	5.05e-06	1	GCCTTATCTCT
MA1104.1	GATA6	SH2D4B	chr10	80537802-80538002(+)	19	31	-	14.4862	5.28e-06	1	TGCAGATAAGAGG
MA0035.3	Gata1	MTRF1L	chr6	153002585-153002785(-)	12	22	+	14.7755	5.38e-06	1	CCCTTATCTCC
MA0140.2	GATA1::TAL1	SRSF1	chr17	58007246-58007446(-)	180	197	-	15.0545	5.41e-06	1	TTTATCAGCTCGGCGCAC
MA0140.2	GATA1::TAL1	RNPEPL1	chr2	240565704-240565904(+)	154	171	-	15.0364	5.49e-06	1	CTTATCTAGAGAGGCCAG
MA0036.3	GATA2	SYNE3	chr14	95475736-95475936(-)	77	87	+	13.4694	5.55e-06	1	GCCTTATCTGT
MA1104.1	GATA6	ABCB7	chrX	75156632-75156832(-)	110	122	+	14.4495	5.8e-06	1	TGAAGATAAGAAT
MA0140.2	GATA1::TAL1	TMEM154	chr4	152680065-152680265(-)	103	120	-	14.9636	5.81e-06	1	ATTATCACGCCTCTCCAG
MA0482.1	Gata4	C16orf58	chr16	31509209-31509409(-)	25	35	-	14.8966	5.81e-06	1	CCTTATCTCAC
MA0482.1	Gata4	CHPT1	chr12	101696847-101697047(+)	85	95	-	14.8966	5.81e-06	1	CCTTATCTCAC
MA0035.3	Gata1	PFDN1	chr5	140303021-140303221(-)	17	27	-	14.7143	6.08e-06	1	TTCTTATCTTT
MA0035.3	Gata1	SYNE3	chr14	95475736-95475936(-)	77	87	+	14.7143	6.08e-06	1	GCCTTATCTGT
MA0140.2	GATA1::TAL1	LACTB2	chr8	70669074-70669274(-)	108	125	-	14.8727	6.23e-06	1	CCTATCTGGATACTCCAG
MA0140.2	GATA1::TAL1	TBP	chr6	170554202-170554402(+)	143	160	+	14.8545	6.31e-06	1	ATTATCAACGCGCGCCAG
MA0482.1	Gata4	SYNE3	chr14	95475736-95475936(-)	78	88	+	14.7586	6.36e-06	1	CCTTATCTGTG
MA0140.2	GATA1::TAL1	SPTB	chr14	64879807-64880007(-)	8	25	+	14.8364	6.4e-06	1	ACTATCTGGTCCCGGCAG
MA0140.2	GATA1::TAL1	P2RY14	chr3	151278367-151278567(-)	104	121	+	14.8364	6.4e-06	1	TCTATCTGACAACAGCAG
MA0140.2	GATA1::TAL1	ZKSCAN5	chr7	99504551-99504751(+)	1	18	-	14.7636	6.76e-06	1	CCTATCAGAAGGTGGCAG
MA0035.3	Gata1	CARD11	chr7	3043845-3044045(-)	69	79	+	14.6327	7.2e-06	1	TCCTTATCTTT
MA0035.3	Gata1	NPM1	chr5	171387016-171387216(+)	160	170	-	14.6327	7.2e-06	1	TCCTTATCTTT
MA0036.3	GATA2	SH2D4B	chr10	80537802-80538002(+)	20	30	+	13.3776	7.32e-06	1	CTCTTATCTGC
MA0035.3	Gata1	GPAM	chr10	112215277-112215477(-)	29	39	+	14.6122	7.45e-06	1	GCCTTATCTCT
MA0035.3	Gata1	LOXHD1	chr18	46657120-46657320(-)	68	78	-	14.6122	7.45e-06	1	GCCTTATCTCT
MA0035.3	Gata1	ING1	chr13	110712636-110712836(+)	134	144	-	14.6122	7.45e-06	1	GCCTTATCTCT
MA0035.3	Gata1	PSMC6	chr14	52707072-52707272(+)	160	170	-	14.6122	7.45e-06	1	GCCTTATCTCT
MA0140.2	GATA1::TAL1	LTF	chr3	46485134-46485334(-)	177	194	+	14.6182	7.51e-06	1	CTTATCATCACCTGCCAG
MA0036.3	GATA2	AP1B1	chr22	29423079-29423279(-)	102	112	-	13.3673	7.57e-06	1	CCCTTATCTGT
MA0140.2	GATA1::TAL1	TAS2R50	chr12	10986812-10987012(-)	143	160	-	14.5818	7.71e-06	1	GTTATCATATCTGAGCAG
MA0036.3	GATA2	MTRF1L	chr6	153002585-153002785(-)	12	22	+	13.3469	7.77e-06	1	CCCTTATCTCC
MA0140.2	GATA1::TAL1	TAS2R46	chr12	11062194-11062394(-)	91	108	-	14.5091	8.12e-06	1	GTTATCATGTCTGAACAG
MA0140.2	GATA1::TAL1	TAS2R43	chr12	11092213-11092413(-)	175	192	-	14.5091	8.12e-06	1	GTTATCATGTCTGAACAG
MA1104.1	GATA6	PTMS	chr12	6765416-6765616(+)	15	27	+	14.2661	8.29e-06	1	CTCAGATAAGACA
MA0035.3	Gata1	ZMYND11	chr10	134365-134565(+)	14	24	+	14.3673	8.32e-06	1	TGCTTATCTCC
MA0140.2	GATA1::TAL1	SH3BP1	chr22	37634554-37634754(+)	12	29	+	14.4545	8.45e-06	1	CCTATCAGATCCCTACAG
MA0482.1	Gata4	CCDC51	chr3	48440356-48440556(-)	7	17	+	14.5	8.45e-06	1	CCTTATCTTCC
MA0482.1	Gata4	PSRC1	chr1	109283086-109283286(-)	181	191	-	14.5	8.45e-06	1	CCTTATCTTCC
MA0035.3	Gata1	TOX4	chr14	21476497-21476697(+)	60	70	+	14.3061	8.57e-06	1	CGCTTATCTGT
MA0482.1	Gata4	CCRL2	chr3	46407063-46407263(+)	94	104	+	14.4483	8.9e-06	1	CCTTATCTCAG
MA0482.1	Gata4	RHD	chr1	25272293-25272493(+)	137	147	-	14.4483	8.9e-06	1	CCTTATCTCAG
MA1104.1	GATA6	RPA3	chr7	7718507-7718707(-)	107	119	+	14.2018	9.01e-06	1	CTCAGATAAGAGG
MA0140.2	GATA1::TAL1	GLB1	chr3	33097130-33097330(-)	21	38	-	14.3455	9.12e-06	1	ACTATCTGGGTTTTGCAG
MA0036.3	GATA2	NANP	chr20	25624075-25624275(-)	16	26	-	13.2959	9.33e-06	1	TGCTTATCTCT
MA0036.3	GATA2	COLQ	chr3	15521651-15521851(-)	163	173	-	13.2959	9.33e-06	1	TGCTTATCTCT
MA0140.2	GATA1::TAL1	GYPE	chr4	143905463-143905663(-)	49	66	-	14.2545	9.7e-06	1	GTTATCTTCCAGGCCCAC
MA0140.2	GATA1::TAL1	GYPB	chr4	144019245-144019445(-)	51	68	-	14.2545	9.7e-06	1	GTTATCTTCCAGGCCCAC
MA0140.2	GATA1::TAL1	UBA5	chr3	132654346-132654546(+)	93	110	-	14.2545	9.7e-06	1	CTTATCACCTCAGTCCAC
MA0140.2	GATA1::TAL1	RHAG	chr6	49636784-49636984(-)	114	131	+	14.2545	9.7e-06	1	CTTATCAACATCTCACAG
MA0140.2	GATA1::TAL1	GYPA	chr4	144140686-144140886(-)	144	161	-	14.2545	9.7e-06	1	GTTATCTTCCAGGCCCAC
MA0482.1	Gata4	MTRF1L	chr6	153002585-153002785(-)	13	23	+	14.3621	9.82e-06	1	CCTTATCTCCA
MA1104.1	GATA6	ITM2A	chrX	79367567-79367767(-)	172	184	-	14.1468	9.85e-06	1	TTCAGATAAGAGC
MA0140.2	GATA1::TAL1	PTTG2	chr4	37960335-37960535(+)	109	126	-	14.2	1.01e-05	1	CTTATCAACGTAGATCAG
MA0482.1	Gata4	ADIPOR1	chr1	202958472-202958672(-)	26	36	-	14.2931	1.01e-05	1	CCTTATCTCAT
MA0482.1	Gata4	YIPF6	chrX	68498223-68498423(+)	67	77	-	14.2931	1.01e-05	1	CCTTATCTCAT
MA0035.3	Gata1	ABCB7	chrX	75156632-75156832(-)	111	121	-	14.102	1.03e-05	1	TTCTTATCTTC
MA0482.1	Gata4	PFDN1	chr5	140303021-140303221(-)	16	26	-	14.2586	1.05e-05	1	TCTTATCTTTC
MA0482.1	Gata4	C2CD5	chr12	22544446-22544646(-)	48	58	+	14.1897	1.08e-05	1	CCTTATCTTTC
MA0482.1	Gata4	C4orf46	chr4	158672155-158672355(-)	148	158	-	14.1897	1.08e-05	1	CCTTATCTTTC
MA0482.1	Gata4	ETFDH	chr4	158672025-158672225(+)	173	183	+	14.1897	1.08e-05	1	CCTTATCTTTC
MA0036.3	GATA2	ZMYND11	chr10	134365-134565(+)	14	24	+	13.2551	1.09e-05	1	TGCTTATCTCC
MA0036.3	GATA2	CCDC51	chr3	48440356-48440556(-)	6	16	+	13.2449	1.18e-05	1	GCCTTATCTTC
MA0036.3	GATA2	AMPD3	chr11	10308213-10308413(+)	177	187	+	13.2449	1.18e-05	1	GCCTTATCTTC
MA0036.3	GATA2	PSRC1	chr1	109283086-109283286(-)	182	192	-	13.2449	1.18e-05	1	GCCTTATCTTC
MA0482.1	Gata4	PTMS	chr12	6765416-6765616(+)	15	25	-	14.1207	1.2e-05	1	TCTTATCTGAG
MA0482.1	Gata4	RPA3	chr7	7718507-7718707(-)	107	117	-	14.1207	1.2e-05	1	TCTTATCTGAG
MA0035.3	Gata1	GNB5	chr15	52191269-52191469(-)	42	52	-	14.0204	1.23e-05	1	TCCTTATCTTC
MA0140.2	GATA1::TAL1	HNRNPA0	chr5	137754276-137754476(-)	120	137	-	13.8182	1.29e-05	1	CCTATCTGGGCACCACAC
MA0482.1	Gata4	ICAM4	chr19	10286867-10287067(+)	84	94	+	14.0517	1.3e-05	1	CCTTATCTCTA
MA0482.1	Gata4	PSMC6	chr14	52707072-52707272(+)	159	169	-	14.0517	1.3e-05	1	CCTTATCTCTA
MA0035.3	Gata1	LCAT	chr16	67944031-67944231(-)	77	87	-	13.9796	1.3e-05	1	TCCTTATCTGG
MA0035.3	Gata1	COX4I1	chr16	85798533-85798733(+)	111	121	-	13.9796	1.3e-05	1	TCCTTATCTGG
MA1104.1	GATA6	ESCO2	chr8	27771849-27772049(+)	67	79	-	13.8899	1.32e-05	1	GACAGATAAGGAA
MA0482.1	Gata4	SH2D4B	chr10	80537802-80538002(+)	21	31	+	14.0345	1.33e-05	1	TCTTATCTGCA
MA0482.1	Gata4	ZMYND11	chr10	134365-134565(+)	15	25	+	14	1.35e-05	1	GCTTATCTCCG
MA0036.3	GATA2	YIPF6	chrX	68498223-68498423(+)	68	78	-	13.1939	1.42e-05	1	TCCTTATCTCA
MA0140.2	GATA1::TAL1	RNASE6	chr14	20780951-20781151(+)	140	157	-	13.6364	1.45e-05	1	ATTATCACATGTATACAG
MA0140.2	GATA1::TAL1	TIGD1	chr2	232550492-232550692(-)	104	121	+	13.6	1.48e-05	1	GCTATCTCGGGACGCCAG
MA0036.3	GATA2	C2CD5	chr12	22544446-22544646(-)	47	57	+	13.1837	1.52e-05	1	CCCTTATCTTT
MA0036.3	GATA2	ETFDH	chr4	158672025-158672225(+)	172	182	+	13.1837	1.52e-05	1	CCCTTATCTTT
MA0036.3	GATA2	NAGK	chr2	71064244-71064444(+)	48	58	-	13.1837	1.52e-05	1	ACCTTATCTGC
MA0036.3	GATA2	C4orf46	chr4	158672155-158672355(-)	149	159	-	13.1837	1.52e-05	1	CCCTTATCTTT
MA0482.1	Gata4	GNB5	chr15	52191269-52191469(-)	41	51	-	13.8966	1.56e-05	1	CCTTATCTTCT
MA0482.1	Gata4	AMPD3	chr11	10308213-10308413(+)	178	188	+	13.8966	1.56e-05	1	CCTTATCTTCT
MA0035.3	Gata1	C2CD5	chr12	22544446-22544646(-)	47	57	+	13.8571	1.56e-05	1	CCCTTATCTTT
MA0035.3	Gata1	ETFDH	chr4	158672025-158672225(+)	172	182	+	13.8571	1.56e-05	1	CCCTTATCTTT
MA0035.3	Gata1	C4orf46	chr4	158672155-158672355(-)	149	159	-	13.8571	1.56e-05	1	CCCTTATCTTT
MA1104.1	GATA6	CARD11	chr7	3043845-3044045(-)	68	80	-	13.7064	1.58e-05	1	AAAAGATAAGGAA
MA1104.1	GATA6	YIPF6	chrX	68498223-68498423(+)	67	79	+	13.6972	1.59e-05	1	ATGAGATAAGGAA
MA0035.3	Gata1	YIPF6	chrX	68498223-68498423(+)	68	78	-	13.8367	1.59e-05	1	TCCTTATCTCA
MA0140.2	GATA1::TAL1	CERS4	chr19	8206636-8206836(+)	100	117	+	13.4545	1.62e-05	1	ATTATCTTTCTTTTCCAG
MA0140.2	GATA1::TAL1	BRCA1	chr17	43170145-43170345(-)	106	123	-	13.4545	1.62e-05	1	TTTATCTGTAATTCCCAC
MA1104.1	GATA6	AP1B1	chr22	29423079-29423279(-)	101	113	+	13.6606	1.65e-05	1	TACAGATAAGGGA
MA0140.2	GATA1::TAL1	EMC9	chr14	24141488-24141688(-)	14	31	+	13.4	1.67e-05	1	CCTATCAAGGAGCACCAC
MA0140.2	GATA1::TAL1	AGAP4	chr10	45853775-45853975(-)	89	106	-	13.3636	1.71e-05	1	CCTATCAGTTCAGTTCAG
MA0482.1	Gata4	COLQ	chr3	15521651-15521851(-)	162	172	-	13.6897	1.74e-05	1	GCTTATCTCTG
MA0035.3	Gata1	TAS2R19	chr12	11022520-11022720(-)	133	143	+	13.5714	1.74e-05	1	TTTTTATCTGT
MA0035.3	Gata1	IP6K2	chr3	48740253-48740453(-)	68	78	-	13.5714	1.74e-05	1	TTTTTATCTGT
MA0035.3	Gata1	ZNF566	chr19	36489802-36490002(-)	18	28	+	13.5306	1.76e-05	1	GGCTTATCTGT
MA0140.2	GATA1::TAL1	MYO18B	chr22	25742044-25742244(+)	50	67	+	13.2909	1.79e-05	1	GCTATCACATTGGCCCAG
MA0482.1	Gata4	AP1B1	chr22	29423079-29423279(-)	101	111	-	13.6552	1.84e-05	1	CCTTATCTGTA
MA0482.1	Gata4	NUP35	chr2	183117413-183117613(+)	136	146	-	13.6552	1.84e-05	1	TCTTATCACTC
MA0035.3	Gata1	WDR74	chr11	62841709-62841909(-)	143	153	+	13.4898	1.86e-05	1	TTCTTATCAGT
MA0035.3	Gata1	NAGK	chr2	71064244-71064444(+)	48	58	-	13.4898	1.86e-05	1	ACCTTATCTGC
MA0035.3	Gata1	APOBEC3C	chr22	39013983-39014183(+)	98	108	-	13.4898	1.86e-05	1	TCTTTATCTGT
MA1104.1	GATA6	GRAMD2B	chr5	126360032-126360232(+)	19	31	+	13.4495	1.9e-05	1	TCAAGATAAGATG
MA1104.1	GATA6	ETFA	chr15	76311372-76311572(-)	74	86	-	13.4404	1.91e-05	1	ACGAGATAAGACG
MA1104.1	GATA6	ETFDH	chr4	158672025-158672225(+)	171	183	-	13.4404	1.91e-05	1	GAAAGATAAGGGA
MA1104.1	GATA6	C4orf46	chr4	158672155-158672355(-)	148	160	+	13.4404	1.91e-05	1	GAAAGATAAGGGA
MA0036.3	GATA2	ZNF800	chr7	127431824-127432024(-)	137	147	-	13.0408	1.91e-05	1	ACCTTATCTTT
MA0482.1	Gata4	CARD11	chr7	3043845-3044045(-)	70	80	+	13.5862	1.93e-05	1	CCTTATCTTTT
MA0482.1	Gata4	ZNF800	chr7	127431824-127432024(-)	136	146	-	13.5862	1.93e-05	1	CCTTATCTTTT
MA0035.3	Gata1	DNTT	chr10	96304296-96304496(+)	12	22	-	13.4694	1.94e-05	1	TTTTTATCTCT
MA0140.2	GATA1::TAL1	YIF1B	chr19	38317173-38317373(-)	112	129	-	13.1455	1.95e-05	1	CTTATCTCAGGAAAACAT
MA0036.3	GATA2	ZNF566	chr19	36489802-36490002(-)	18	28	+	13	2e-05	1	GGCTTATCTGT
MA0482.1	Gata4	NANP	chr20	25624075-25624275(-)	15	25	-	13.5345	2.02e-05	1	GCTTATCTCTT
MA1104.1	GATA6	ICAM4	chr19	10286867-10287067(+)	82	94	-	13.3394	2.03e-05	1	TAGAGATAAGGAG
MA1104.1	GATA6	C1orf122	chr1	37806879-37807079(+)	152	164	-	13.3119	2.06e-05	1	TCCAGATAAGACT
MA0482.1	Gata4	COX7C	chr5	86617804-86618004(+)	35	45	-	13.5	2.06e-05	1	CCTTATCAGCC
MA1104.1	GATA6	CCRL2	chr3	46407063-46407263(+)	92	104	-	13.3028	2.07e-05	1	CTGAGATAAGGGA
MA0036.3	GATA2	TMEM204	chr16	1528588-1528788(+)	77	87	-	12.9592	2.13e-05	1	GGCTTATCTGC
MA0035.3	Gata1	FAM13B	chr5	138051861-138052061(-)	27	37	+	13.3878	2.17e-05	1	TCTTTATCTCT
MA0035.3	Gata1	GALK1	chr17	75765611-75765811(-)	136	146	+	13.3878	2.17e-05	1	TCTTTATCTCT
MA0037.3	GATA3	PTMS	chr12	6765416-6765616(+)	18	25	+	11.8525	2.18e-05	1	AGATAAGA
MA0037.3	GATA3	PFDN1	chr5	140303021-140303221(-)	19	26	+	11.8525	2.18e-05	1	AGATAAGA
MA0037.3	GATA3	GRAMD2B	chr5	126360032-126360232(+)	22	29	+	11.8525	2.18e-05	1	AGATAAGA
MA0037.3	GATA3	SH2D4B	chr10	80537802-80538002(+)	21	28	-	11.8525	2.18e-05	1	AGATAAGA
MA0037.3	GATA3	RPAP1	chr15	41544169-41544369(-)	38	45	+	11.8525	2.18e-05	1	AGATAAGA
MA0037.3	GATA3	CHMP6	chr17	80991498-80991698(+)	78	85	+	11.8525	2.18e-05	1	AGATAAGA
MA0037.3	GATA3	ETFA	chr15	76311372-76311572(-)	76	83	-	11.8525	2.18e-05	1	AGATAAGA
MA0037.3	GATA3	CPOX	chr3	98593623-98593823(-)	86	93	-	11.8525	2.18e-05	1	AGATAAGA
MA0037.3	GATA3	RPA3	chr7	7718507-7718707(-)	110	117	+	11.8525	2.18e-05	1	AGATAAGA
MA0037.3	GATA3	ABCB7	chrX	75156632-75156832(-)	113	120	+	11.8525	2.18e-05	1	AGATAAGA
MA0037.3	GATA3	GHRL	chr3	10292847-10293047(-)	153	160	-	11.8525	2.18e-05	1	AGATAAGA
MA0037.3	GATA3	C1orf122	chr1	37806879-37807079(+)	154	161	-	11.8525	2.18e-05	1	AGATAAGA
MA0037.3	GATA3	ITM2A	chrX	79367567-79367767(-)	174	181	-	11.8525	2.18e-05	1	AGATAAGA
MA0766.1	GATA5	PTMS	chr12	6765416-6765616(+)	18	25	+	10.9091	2.18e-05	1	AGATAAGA
MA0766.1	GATA5	PFDN1	chr5	140303021-140303221(-)	19	26	+	10.9091	2.18e-05	1	AGATAAGA
MA0766.1	GATA5	GRAMD2B	chr5	126360032-126360232(+)	22	29	+	10.9091	2.18e-05	1	AGATAAGA
MA0766.1	GATA5	SH2D4B	chr10	80537802-80538002(+)	21	28	-	10.9091	2.18e-05	1	AGATAAGA
MA0766.1	GATA5	RPAP1	chr15	41544169-41544369(-)	38	45	+	10.9091	2.18e-05	1	AGATAAGA
MA0766.1	GATA5	CHMP6	chr17	80991498-80991698(+)	78	85	+	10.9091	2.18e-05	1	AGATAAGA
MA0766.1	GATA5	ETFA	chr15	76311372-76311572(-)	76	83	-	10.9091	2.18e-05	1	AGATAAGA
MA0766.1	GATA5	CPOX	chr3	98593623-98593823(-)	86	93	-	10.9091	2.18e-05	1	AGATAAGA
MA0766.1	GATA5	RPA3	chr7	7718507-7718707(-)	110	117	+	10.9091	2.18e-05	1	AGATAAGA
MA0766.1	GATA5	ABCB7	chrX	75156632-75156832(-)	113	120	+	10.9091	2.18e-05	1	AGATAAGA
MA0766.1	GATA5	GHRL	chr3	10292847-10293047(-)	153	160	-	10.9091	2.18e-05	1	AGATAAGA
MA0766.1	GATA5	C1orf122	chr1	37806879-37807079(+)	154	161	-	10.9091	2.18e-05	1	AGATAAGA
MA0766.1	GATA5	ITM2A	chrX	79367567-79367767(-)	174	181	-	10.9091	2.18e-05	1	AGATAAGA
MA0036.3	GATA2	PTMS	chr12	6765416-6765616(+)	16	26	-	12.949	2.19e-05	1	GTCTTATCTGA
MA0482.1	Gata4	UBA5	chr3	132654346-132654546(+)	101	111	-	13.3621	2.23e-05	1	TCTTATCACCT
MA1104.1	GATA6	COX4I1	chr16	85798533-85798733(+)	110	122	+	13.1468	2.25e-05	1	GCCAGATAAGGAA
MA0036.3	GATA2	C16orf58	chr16	31509209-31509409(-)	26	36	-	12.9184	2.27e-05	1	GCCTTATCTCA
MA0036.3	GATA2	RHD	chr1	25272293-25272493(+)	138	148	-	12.9184	2.27e-05	1	GCCTTATCTCA
MA0140.2	GATA1::TAL1	RECQL	chr12	21501569-21501769(-)	98	115	+	12.8727	2.29e-05	1	GTTATCTGTGATTGGCTG
MA1104.1	GATA6	RPAP1	chr15	41544169-41544369(-)	35	47	+	13.0917	2.32e-05	1	CCGAGATAAGACC
MA0035.3	Gata1	ITM2A	chrX	79367567-79367767(-)	173	183	+	13.2449	2.34e-05	1	CTCTTATCTGA
MA0035.3	Gata1	RPA3	chr7	7718507-7718707(-)	108	118	-	13.2449	2.34e-05	1	CTCTTATCTGA
MA0482.1	Gata4	ZNF566	chr19	36489802-36490002(-)	19	29	+	13.2931	2.34e-05	1	GCTTATCTGTG
MA1104.1	GATA6	LOXHD1	chr18	46657120-46657320(-)	67	79	+	13.0642	2.36e-05	1	CAGAGATAAGGCA
MA0140.2	GATA1::TAL1	ABHD8	chr19	17310136-17310336(-)	131	148	-	12.8182	2.36e-05	1	TTTATCTCCGATCCGCAT
MA0140.2	GATA1::TAL1	P2RY10	chrX	78945232-78945432(+)	172	189	+	12.8182	2.36e-05	1	GTTATCAGCAGGATCCAT
MA0036.3	GATA2	TOX4	chr14	21476497-21476697(+)	60	70	+	12.898	2.38e-05	1	CGCTTATCTGT
MA0036.3	GATA2	LCAT	chr16	67944031-67944231(-)	77	87	-	12.898	2.38e-05	1	TCCTTATCTGG
MA0036.3	GATA2	COX4I1	chr16	85798533-85798733(+)	111	121	-	12.898	2.38e-05	1	TCCTTATCTGG
MA0140.2	GATA1::TAL1	MEF2C	chr5	88904157-88904357(-)	138	155	-	12.8	2.39e-05	1	GGTATCACTGACAACCAG
MA0140.2	GATA1::TAL1	IRF9	chr14	24160953-24161153(+)	97	114	+	12.8	2.39e-05	1	AGTATCTGAGGGAGGCAG
MA0140.2	GATA1::TAL1	DCAF12	chr9	34127299-34127499(-)	22	39	-	12.7818	2.41e-05	1	CTTATCTGTAGCTGCCTG
MA0482.1	Gata4	SLC37A3	chr7	140404333-140404533(-)	122	132	+	13.2069	2.42e-05	1	TCTTATCACTG
MA0482.1	Gata4	TNRC18	chr7	5425314-5425514(-)	155	165	+	13.2069	2.42e-05	1	TCTTATCACTG
MA0140.2	GATA1::TAL1	H2AFX	chr11	119095367-119095567(-)	36	53	+	12.7636	2.44e-05	1	CCAATCAGGAGGGCGCAG
MA1104.1	GATA6	GNB5	chr15	52191269-52191469(-)	41	53	+	13	2.46e-05	1	AGAAGATAAGGAG
MA0140.2	GATA1::TAL1	TOMM34	chr20	44960386-44960586(-)	150	167	-	12.7455	2.46e-05	1	AATATCTCCGCCCAACAG
MA0140.2	GATA1::TAL1	ALKBH7	chr19	6372333-6372533(+)	53	70	+	12.7455	2.46e-05	1	CTTATCTCGGCCTGACTG
MA1104.1	GATA6	MTRF1L	chr6	153002585-153002785(-)	11	23	-	12.9725	2.49e-05	1	TGGAGATAAGGGT
MA0140.2	GATA1::TAL1	CLDN15	chr7	101238720-101238920(-)	163	180	-	12.6909	2.54e-05	1	GTTATCAGGGACTGTCAC
MA0036.3	GATA2	RPA3	chr7	7718507-7718707(-)	108	118	-	12.8469	2.54e-05	1	CTCTTATCTGA
MA0036.3	GATA2	ITM2A	chrX	79367567-79367767(-)	173	183	+	12.8469	2.54e-05	1	CTCTTATCTGA
MA0035.3	Gata1	ALKBH7	chr19	6372333-6372533(+)	51	61	+	13.102	2.56e-05	1	CCCTTATCTCG
MA0140.2	GATA1::TAL1	ZNHIT3	chr17	36486529-36486729(+)	58	75	-	12.6727	2.57e-05	1	CCAATCAGCGCTCAGCAG
MA0140.2	GATA1::TAL1	AHSP	chr16	31527764-31527964(+)	51	68	+	12.6727	2.57e-05	1	CCTATCACCCTCCTTCAG
MA0140.2	GATA1::TAL1	SLC43A2	chr17	1628786-1628986(-)	86	103	+	12.6545	2.59e-05	1	CCAATCAGCGGGCGGCAG
MA0140.2	GATA1::TAL1	TCP11L2	chr12	106301829-106302029(+)	88	105	+	12.6545	2.59e-05	1	TTTATCTTTTGCACGCAC
MA0035.3	Gata1	CCRL2	chr3	46407063-46407263(+)	93	103	+	13.0612	2.61e-05	1	CCCTTATCTCA
MA0035.3	Gata1	CHPT1	chr12	101696847-101697047(+)	86	96	-	13.0612	2.61e-05	1	CCCTTATCTCA
MA0140.2	GATA1::TAL1	GHRL	chr3	10292847-10293047(-)	100	117	-	12.6364	2.62e-05	1	GTTATCTTTGGGGAACTG
MA0036.3	GATA2	CCRL2	chr3	46407063-46407263(+)	93	103	+	12.8163	2.62e-05	1	CCCTTATCTCA
MA0036.3	GATA2	CHPT1	chr12	101696847-101697047(+)	86	96	-	12.8163	2.62e-05	1	CCCTTATCTCA
MA1104.1	GATA6	NPM1	chr5	171387016-171387216(+)	159	171	+	12.8899	2.63e-05	1	TAAAGATAAGGAC
MA1104.1	GATA6	COLQ	chr3	15521651-15521851(-)	162	174	+	12.8807	2.65e-05	1	CAGAGATAAGCAA
MA0482.1	Gata4	SCAF11	chr12	45992020-45992220(-)	32	42	-	13.0517	2.66e-05	1	TCTTATCACTT
MA1104.1	GATA6	C2CD5	chr12	22544446-22544646(-)	46	58	-	12.8532	2.67e-05	1	GAAAGATAAGGGG
MA0035.3	Gata1	THG1L	chr5	157731097-157731297(+)	107	117	-	12.9592	2.68e-05	1	TTTTTATCTGC
MA1104.1	GATA6	AMPD3	chr11	10308213-10308413(+)	176	188	-	12.844	2.69e-05	1	AGAAGATAAGGCA
MA1104.1	GATA6	CHPT1	chr12	101696847-101697047(+)	85	97	+	12.844	2.69e-05	1	GTGAGATAAGGGG
MA0140.2	GATA1::TAL1	ARG1	chr6	131573044-131573244(+)	115	132	-	12.5818	2.7e-05	1	TTTATCTAATGAGGACAG
MA0140.2	GATA1::TAL1	ATN1	chr12	6924363-6924563(+)	34	51	-	12.5636	2.73e-05	1	CCTATCTGTGGGACGCAA
MA0035.3	Gata1	TMEM204	chr16	1528588-1528788(+)	77	87	-	12.9184	2.73e-05	1	GGCTTATCTGC
MA0035.3	Gata1	CSRP1	chr1	201509356-201509556(-)	187	197	+	12.8776	2.79e-05	1	TCTTTATCTGC
MA0035.3	Gata1	ERAP2	chr5	96875839-96876039(+)	114	124	-	12.8776	2.79e-05	1	TCTTTATCTGC
MA0482.1	Gata4	ABCB7	chrX	75156632-75156832(-)	110	120	-	13.0172	2.82e-05	1	TCTTATCTTCA
MA0482.1	Gata4	ITM2A	chrX	79367567-79367767(-)	174	184	+	13.0172	2.82e-05	1	TCTTATCTGAA
MA1104.1	GATA6	ZNF800	chr7	127431824-127432024(-)	136	148	+	12.7156	2.9e-05	1	AAAAGATAAGGTG
MA1104.1	GATA6	ADIPOR1	chr1	202958472-202958672(-)	26	38	+	12.7064	2.9e-05	1	ATGAGATAAGGTG
MA0035.3	Gata1	COA6	chr1	234373356-234373556(+)	65	75	-	12.7959	3e-05	1	CTTTTATCTGT
MA0035.3	Gata1	CSGALNACT1	chr8	19757929-19758129(-)	68	78	-	12.7959	3e-05	1	CTTTTATCTGT
MA0035.3	Gata1	USP45	chr6	99521628-99521828(-)	98	108	-	12.7959	3e-05	1	CTTTTATCTGT
MA0035.3	Gata1	IP6K2	chr3	48740253-48740453(-)	99	109	-	12.7959	3e-05	1	TGCTTATCTGG
MA0140.2	GATA1::TAL1	APH1B	chr15	63275918-63276118(+)	183	200	+	12.3818	3.02e-05	1	CATATCTTTACAAAGCAG
MA1104.1	GATA6	GHRL	chr3	10292847-10293047(-)	151	163	-	12.6239	3.03e-05	1	CTTAGATAAGACC
MA0482.1	Gata4	GCC1	chr7	127593511-127593711(-)	51	61	+	12.9483	3.04e-05	1	TCTTATCACAC
MA1104.1	GATA6	NAGK	chr2	71064244-71064444(+)	47	59	+	12.6055	3.07e-05	1	GGCAGATAAGGTC
MA1104.1	GATA6	PSMC6	chr14	52707072-52707272(+)	159	171	+	12.5963	3.08e-05	1	TAGAGATAAGGCG
MA0035.3	Gata1	TXNRD3	chr3	126655055-126655255(-)	1	11	-	12.7755	3.09e-05	1	TCTTTATCTCC
MA0035.3	Gata1	MAP3K2	chr2	127388365-127388565(-)	14	24	-	12.7755	3.09e-05	1	TTCTTATCACC
MA0482.1	Gata4	PYGO2	chr1	154963753-154963953(-)	61	71	+	12.8966	3.12e-05	1	CCTTATCAGCT
MA0482.1	Gata4	DPY19L1	chr7	35038171-35038371(-)	115	125	+	12.8966	3.12e-05	1	CCTTATCAGCT
MA0140.2	GATA1::TAL1	GHRL	chr3	10292847-10293047(-)	154	171	+	12.3273	3.12e-05	1	CTTATCTAAGATCAACAT
MA0035.3	Gata1	IFIT1B	chr10	89377956-89378156(+)	81	91	+	12.7551	3.12e-05	1	TGCTTATCTGA
MA0035.3	Gata1	AAK1	chr2	69674249-69674449(-)	153	163	+	12.7551	3.12e-05	1	TGCTTATCTGA
MA0482.1	Gata4	RPAP1	chr15	41544169-41544369(-)	35	45	-	12.8621	3.2e-05	1	TCTTATCTCGG
MA0036.3	GATA2	IFIT1B	chr10	89377956-89378156(+)	81	91	+	12.7041	3.21e-05	1	TGCTTATCTGA
MA0036.3	GATA2	AAK1	chr2	69674249-69674449(-)	153	163	+	12.7041	3.21e-05	1	TGCTTATCTGA
MA0036.3	GATA2	ETFA	chr15	76311372-76311572(-)	75	85	+	12.6939	3.23e-05	1	GTCTTATCTCG
MA0036.3	GATA2	RPAP1	chr15	41544169-41544369(-)	36	46	-	12.6939	3.23e-05	1	GTCTTATCTCG
MA0140.2	GATA1::TAL1	ZNF582	chr19	56393445-56393645(-)	59	76	+	12.2545	3.25e-05	1	CCTATCATGGCGCAGCAT
MA0140.2	GATA1::TAL1	EXOC6	chr10	92834613-92834813(+)	82	99	+	12.2545	3.25e-05	1	AATATCTGACATCTGCAG
MA0482.1	Gata4	COX4I1	chr16	85798533-85798733(+)	110	120	-	12.8448	3.25e-05	1	CCTTATCTGGC
MA1104.1	GATA6	ING1	chr13	110712636-110712836(+)	133	145	+	12.4771	3.26e-05	1	AAGAGATAAGGCC
MA0035.3	Gata1	CPOX	chr3	98593623-98593823(-)	3	13	+	12.6939	3.27e-05	1	CTTTTATCTCT
MA0035.3	Gata1	TNFSF4	chr1	173207213-173207413(-)	90	100	+	12.6939	3.27e-05	1	CTTTTATCTCT
MA0035.3	Gata1	NTNG2	chr9	132161576-132161776(+)	119	129	-	12.6939	3.27e-05	1	CTTTTATCTCT
MA1104.1	GATA6	NANP	chr20	25624075-25624275(-)	15	27	+	12.4679	3.27e-05	1	AAGAGATAAGCAG
MA0036.3	GATA2	C1orf122	chr1	37806879-37807079(+)	153	163	+	12.6735	3.31e-05	1	GTCTTATCTGG
MA0036.3	GATA2	BCS1L	chr2	218658664-218658864(+)	190	200	+	12.6735	3.31e-05	1	CGCTTATCTTC
MA0036.3	GATA2	ADIPOR1	chr1	202958472-202958672(-)	27	37	-	12.6735	3.31e-05	1	ACCTTATCTCA
MA0482.1	Gata4	ALKBH7	chr19	6372333-6372533(+)	52	62	+	12.7931	3.33e-05	1	CCTTATCTCGG
MA1104.1	GATA6	LCAT	chr16	67944031-67944231(-)	76	88	+	12.4312	3.33e-05	1	ACCAGATAAGGAC
MA0482.1	Gata4	ADD3	chr10	109996268-109996468(+)	29	39	+	12.7759	3.36e-05	1	CGTTATCTCTC
MA0140.2	GATA1::TAL1	GCC2	chr2	108448461-108448661(+)	46	63	+	12.1818	3.38e-05	1	CCAATCAGGACACAGCAG
MA0035.3	Gata1	MLC1	chr22	50085802-50086002(-)	95	105	-	12.6122	3.44e-05	1	CCTTTATCTCT
MA1104.1	GATA6	C16orf58	chr16	31509209-31509409(-)	25	37	+	12.3211	3.53e-05	1	GTGAGATAAGGCG
MA0140.2	GATA1::TAL1	ATF6	chr1	161766194-161766394(+)	131	148	+	12.0909	3.55e-05	1	TTAATCACGGAGTTCCAG
MA0035.3	Gata1	C1orf122	chr1	37806879-37807079(+)	153	163	+	12.5102	3.57e-05	1	GTCTTATCTGG
MA0036.3	GATA2	ACADVL	chr17	7217025-7217225(+)	18	28	-	12.6224	3.57e-05	1	GCCTTATCTGG
MA0482.1	Gata4	SLC16A5	chr17	75087627-75087827(+)	50	60	+	12.7069	3.57e-05	1	TGTTATCTCCG
MA0482.1	Gata4	ETFA	chr15	76311372-76311572(-)	76	86	+	12.7069	3.57e-05	1	TCTTATCTCGT
MA1104.1	GATA6	GPAM	chr10	112215277-112215477(-)	28	40	-	12.3028	3.58e-05	1	CAGAGATAAGGCC
MA0482.1	Gata4	WDR74	chr11	62841709-62841909(-)	144	154	+	12.6552	3.65e-05	1	TCTTATCAGTT
MA1104.1	GATA6	IP6K2	chr3	48740253-48740453(-)	98	110	+	12.2661	3.66e-05	1	ACCAGATAAGCAA
MA1104.1	GATA6	SYNE3	chr14	95475736-95475936(-)	76	88	-	12.2569	3.69e-05	1	CACAGATAAGGCC
MA1104.1	GATA6	ALKBH7	chr19	6372333-6372533(+)	50	62	-	12.2294	3.74e-05	1	CCGAGATAAGGGT
MA0482.1	Gata4	NPM1	chr5	171387016-171387216(+)	159	169	-	12.6379	3.74e-05	1	CCTTATCTTTA
MA0035.3	Gata1	CCDC51	chr3	48440356-48440556(-)	6	16	+	12.4694	3.74e-05	1	GCCTTATCTTC
MA0035.3	Gata1	AMPD3	chr11	10308213-10308413(+)	177	187	+	12.4694	3.74e-05	1	GCCTTATCTTC
MA0035.3	Gata1	PTMS	chr12	6765416-6765616(+)	16	26	-	12.4694	3.74e-05	1	GTCTTATCTGA
MA0035.3	Gata1	ZNF800	chr7	127431824-127432024(-)	137	147	-	12.4694	3.74e-05	1	ACCTTATCTTT
MA0035.3	Gata1	PSRC1	chr1	109283086-109283286(-)	182	192	-	12.4694	3.74e-05	1	GCCTTATCTTC
MA0140.2	GATA1::TAL1	ATP2A2	chr12	110280656-110280856(+)	110	127	-	11.9818	3.77e-05	1	CTAATCTGGCTCCTTCAG
MA1104.1	GATA6	PSRC1	chr1	109283086-109283286(-)	181	193	+	12.211	3.77e-05	1	GGAAGATAAGGCG
MA0035.3	Gata1	ACADVL	chr17	7217025-7217225(+)	18	28	-	12.4286	3.79e-05	1	GCCTTATCTGG
MA1104.1	GATA6	CCDC51	chr3	48440356-48440556(-)	5	17	-	12.1835	3.84e-05	1	GGAAGATAAGGCT
MA0482.1	Gata4	IFIT1B	chr10	89377956-89378156(+)	82	92	+	12.5862	3.85e-05	1	GCTTATCTGAG
MA0036.3	GATA2	ALKBH7	chr19	6372333-6372533(+)	51	61	+	12.5408	3.86e-05	1	CCCTTATCTCG
MA0035.3	Gata1	ETFA	chr15	76311372-76311572(-)	75	85	+	12.4082	3.88e-05	1	GTCTTATCTCG
MA0035.3	Gata1	RPAP1	chr15	41544169-41544369(-)	36	46	-	12.4082	3.88e-05	1	GTCTTATCTCG
MA0140.2	GATA1::TAL1	KCTD7	chr7	66628667-66628867(+)	40	57	+	11.9091	3.92e-05	1	CCAATCAGTGCACGGCAG
MA1104.1	GATA6	ZMYND11	chr10	134365-134565(+)	13	25	-	12.1468	3.92e-05	1	CGGAGATAAGCAT
MA1104.1	GATA6	TOX4	chr14	21476497-21476697(+)	59	71	-	12.1468	3.92e-05	1	TACAGATAAGCGG
MA0482.1	Gata4	GPN2	chr1	26890197-26890397(-)	134	144	+	12.5517	3.94e-05	1	TGTTATCTCCT
MA0037.3	GATA3	SNAI1	chr20	49982899-49983099(+)	6	13	+	11.7377	3.96e-05	1	AGATAAGG
MA0037.3	GATA3	CCDC51	chr3	48440356-48440556(-)	7	14	-	11.7377	3.96e-05	1	AGATAAGG
MA0037.3	GATA3	ACADVL	chr17	7217025-7217225(+)	20	27	+	11.7377	3.96e-05	1	AGATAAGG
MA0037.3	GATA3	MTRF1L	chr6	153002585-153002785(-)	13	20	-	11.7377	3.96e-05	1	AGATAAGG
MA0037.3	GATA3	C16orf58	chr16	31509209-31509409(-)	28	35	+	11.7377	3.96e-05	1	AGATAAGG
MA0037.3	GATA3	ADIPOR1	chr1	202958472-202958672(-)	29	36	+	11.7377	3.96e-05	1	AGATAAGG
MA0037.3	GATA3	GPAM	chr10	112215277-112215477(-)	30	37	-	11.7377	3.96e-05	1	AGATAAGG
MA0037.3	GATA3	GNB5	chr15	52191269-52191469(-)	44	51	+	11.7377	3.96e-05	1	AGATAAGG
MA0037.3	GATA3	NAGK	chr2	71064244-71064444(+)	50	57	+	11.7377	3.96e-05	1	AGATAAGG
MA0037.3	GATA3	C2CD5	chr12	22544446-22544646(-)	48	55	-	11.7377	3.96e-05	1	AGATAAGG
MA0037.3	GATA3	ALKBH7	chr19	6372333-6372533(+)	52	59	-	11.7377	3.96e-05	1	AGATAAGG
MA0037.3	GATA3	YIPF6	chrX	68498223-68498423(+)	70	77	+	11.7377	3.96e-05	1	AGATAAGG
MA0037.3	GATA3	LOXHD1	chr18	46657120-46657320(-)	70	77	+	11.7377	3.96e-05	1	AGATAAGG
MA0037.3	GATA3	ESCO2	chr8	27771849-27772049(+)	69	76	-	11.7377	3.96e-05	1	AGATAAGG
MA0037.3	GATA3	CARD11	chr7	3043845-3044045(-)	70	77	-	11.7377	3.96e-05	1	AGATAAGG
MA0037.3	GATA3	LCAT	chr16	67944031-67944231(-)	79	86	+	11.7377	3.96e-05	1	AGATAAGG
MA0037.3	GATA3	SYNE3	chr14	95475736-95475936(-)	78	85	-	11.7377	3.96e-05	1	AGATAAGG
MA0037.3	GATA3	CHPT1	chr12	101696847-101697047(+)	88	95	+	11.7377	3.96e-05	1	AGATAAGG
MA0037.3	GATA3	ICAM4	chr19	10286867-10287067(+)	84	91	-	11.7377	3.96e-05	1	AGATAAGG
MA0037.3	GATA3	CCRL2	chr3	46407063-46407263(+)	94	101	-	11.7377	3.96e-05	1	AGATAAGG
MA0037.3	GATA3	AP1B1	chr22	29423079-29423279(-)	104	111	+	11.7377	3.96e-05	1	AGATAAGG
MA0037.3	GATA3	COX4I1	chr16	85798533-85798733(+)	113	120	+	11.7377	3.96e-05	1	AGATAAGG
MA0037.3	GATA3	ING1	chr13	110712636-110712836(+)	136	143	+	11.7377	3.96e-05	1	AGATAAGG
MA0037.3	GATA3	ZNF800	chr7	127431824-127432024(-)	139	146	+	11.7377	3.96e-05	1	AGATAAGG
MA0037.3	GATA3	RHD	chr1	25272293-25272493(+)	140	147	+	11.7377	3.96e-05	1	AGATAAGG
MA0037.3	GATA3	C4orf46	chr4	158672155-158672355(-)	151	158	+	11.7377	3.96e-05	1	AGATAAGG
MA0037.3	GATA3	NPM1	chr5	171387016-171387216(+)	162	169	+	11.7377	3.96e-05	1	AGATAAGG
MA0037.3	GATA3	PSMC6	chr14	52707072-52707272(+)	162	169	+	11.7377	3.96e-05	1	AGATAAGG
MA0037.3	GATA3	ETFDH	chr4	158672025-158672225(+)	173	180	-	11.7377	3.96e-05	1	AGATAAGG
MA0037.3	GATA3	PSRC1	chr1	109283086-109283286(-)	184	191	+	11.7377	3.96e-05	1	AGATAAGG
MA0037.3	GATA3	AMPD3	chr11	10308213-10308413(+)	178	185	-	11.7377	3.96e-05	1	AGATAAGG
MA0766.1	GATA5	SNAI1	chr20	49982899-49983099(+)	6	13	+	10.8364	3.96e-05	1	AGATAAGG
MA0766.1	GATA5	CCDC51	chr3	48440356-48440556(-)	7	14	-	10.8364	3.96e-05	1	AGATAAGG
MA0766.1	GATA5	MTRF1L	chr6	153002585-153002785(-)	13	20	-	10.8364	3.96e-05	1	AGATAAGG
MA0766.1	GATA5	ACADVL	chr17	7217025-7217225(+)	20	27	+	10.8364	3.96e-05	1	AGATAAGG
MA0766.1	GATA5	C16orf58	chr16	31509209-31509409(-)	28	35	+	10.8364	3.96e-05	1	AGATAAGG
MA0766.1	GATA5	ADIPOR1	chr1	202958472-202958672(-)	29	36	+	10.8364	3.96e-05	1	AGATAAGG
MA0766.1	GATA5	GPAM	chr10	112215277-112215477(-)	30	37	-	10.8364	3.96e-05	1	AGATAAGG
MA0766.1	GATA5	GNB5	chr15	52191269-52191469(-)	44	51	+	10.8364	3.96e-05	1	AGATAAGG
MA0766.1	GATA5	NAGK	chr2	71064244-71064444(+)	50	57	+	10.8364	3.96e-05	1	AGATAAGG
MA0766.1	GATA5	C2CD5	chr12	22544446-22544646(-)	48	55	-	10.8364	3.96e-05	1	AGATAAGG
MA0766.1	GATA5	ALKBH7	chr19	6372333-6372533(+)	52	59	-	10.8364	3.96e-05	1	AGATAAGG
MA0766.1	GATA5	LOXHD1	chr18	46657120-46657320(-)	70	77	+	10.8364	3.96e-05	1	AGATAAGG
MA0766.1	GATA5	YIPF6	chrX	68498223-68498423(+)	70	77	+	10.8364	3.96e-05	1	AGATAAGG
MA0766.1	GATA5	ESCO2	chr8	27771849-27772049(+)	69	76	-	10.8364	3.96e-05	1	AGATAAGG
MA0766.1	GATA5	CARD11	chr7	3043845-3044045(-)	70	77	-	10.8364	3.96e-05	1	AGATAAGG
MA0766.1	GATA5	LCAT	chr16	67944031-67944231(-)	79	86	+	10.8364	3.96e-05	1	AGATAAGG
MA0766.1	GATA5	SYNE3	chr14	95475736-95475936(-)	78	85	-	10.8364	3.96e-05	1	AGATAAGG
MA0766.1	GATA5	CHPT1	chr12	101696847-101697047(+)	88	95	+	10.8364	3.96e-05	1	AGATAAGG
MA0766.1	GATA5	ICAM4	chr19	10286867-10287067(+)	84	91	-	10.8364	3.96e-05	1	AGATAAGG
MA0766.1	GATA5	CCRL2	chr3	46407063-46407263(+)	94	101	-	10.8364	3.96e-05	1	AGATAAGG
MA0766.1	GATA5	AP1B1	chr22	29423079-29423279(-)	104	111	+	10.8364	3.96e-05	1	AGATAAGG
MA0766.1	GATA5	COX4I1	chr16	85798533-85798733(+)	113	120	+	10.8364	3.96e-05	1	AGATAAGG
MA0766.1	GATA5	ING1	chr13	110712636-110712836(+)	136	143	+	10.8364	3.96e-05	1	AGATAAGG
MA0766.1	GATA5	ZNF800	chr7	127431824-127432024(-)	139	146	+	10.8364	3.96e-05	1	AGATAAGG
MA0766.1	GATA5	RHD	chr1	25272293-25272493(+)	140	147	+	10.8364	3.96e-05	1	AGATAAGG
MA0766.1	GATA5	C4orf46	chr4	158672155-158672355(-)	151	158	+	10.8364	3.96e-05	1	AGATAAGG
MA0766.1	GATA5	PSMC6	chr14	52707072-52707272(+)	162	169	+	10.8364	3.96e-05	1	AGATAAGG
MA0766.1	GATA5	NPM1	chr5	171387016-171387216(+)	162	169	+	10.8364	3.96e-05	1	AGATAAGG
MA0766.1	GATA5	ETFDH	chr4	158672025-158672225(+)	173	180	-	10.8364	3.96e-05	1	AGATAAGG
MA0766.1	GATA5	PSRC1	chr1	109283086-109283286(-)	184	191	+	10.8364	3.96e-05	1	AGATAAGG
MA0766.1	GATA5	AMPD3	chr11	10308213-10308413(+)	178	185	-	10.8364	3.96e-05	1	AGATAAGG
MA1104.1	GATA6	CREBL2	chr12	12611727-12611927(+)	58	70	+	12.1284	3.99e-05	1	CTGTGATAAGAAA
MA0482.1	Gata4	CREBL2	chr12	12611727-12611927(+)	58	68	-	12.5	3.99e-05	1	TCTTATCACAG
MA0482.1	Gata4	TMEM204	chr16	1528588-1528788(+)	76	86	-	12.5	3.99e-05	1	GCTTATCTGCA
MA0140.2	GATA1::TAL1	RPL22L1	chr3	170870383-170870583(-)	41	58	-	11.8545	4.03e-05	1	CCAATCAGGGCAAGGCAG
MA0140.2	GATA1::TAL1	PAN3	chr13	28138406-28138606(+)	152	169	+	11.8545	4.03e-05	1	TTTATCCGGCACCGGCAG
MA0482.1	Gata4	PEX11B	chr1	145918737-145918937(-)	31	41	-	12.4828	4.07e-05	1	CCTTATCAGAC
MA1104.1	GATA6	AAK1	chr2	69674249-69674449(-)	152	164	-	12.0826	4.09e-05	1	TTCAGATAAGCAG
MA1104.1	GATA6	UBA5	chr3	132654346-132654546(+)	101	113	+	12.0642	4.14e-05	1	AGGTGATAAGATA
MA0140.2	GATA1::TAL1	KLHL6	chr3	183555589-183555789(-)	42	59	-	11.8	4.15e-05	1	CTTATCACCAGCTGTCAC
MA0036.3	GATA2	FBXO9	chr6	53051891-53052091(+)	30	40	+	12.4388	4.2e-05	1	TACTTATCTCT
MA1104.1	GATA6	RHD	chr1	25272293-25272493(+)	137	149	+	12.0183	4.26e-05	1	CTGAGATAAGGCC
MA0140.2	GATA1::TAL1	HNRNPUL2	chr11	62727372-62727572(-)	39	56	-	11.7455	4.27e-05	1	TTTATCGCGCAGCCGCAG
MA0036.3	GATA2	IP6K2	chr3	48740253-48740453(-)	99	109	-	12.4286	4.28e-05	1	TGCTTATCTGG
MA0482.1	Gata4	CPOX	chr3	98593623-98593823(-)	4	14	+	12.4138	4.3e-05	1	TTTTATCTCTC
MA0482.1	Gata4	MAP3K2	chr2	127388365-127388565(-)	13	23	-	12.4138	4.3e-05	1	TCTTATCACCA
MA0482.1	Gata4	NTNG2	chr9	132161576-132161776(+)	118	128	-	12.4138	4.3e-05	1	TTTTATCTCTC
MA0035.3	Gata1	C16orf58	chr16	31509209-31509409(-)	26	36	-	12.2857	4.31e-05	1	GCCTTATCTCA
MA0035.3	Gata1	RHD	chr1	25272293-25272493(+)	138	148	-	12.2857	4.31e-05	1	GCCTTATCTCA
MA0482.1	Gata4	ACADVL	chr17	7217025-7217225(+)	17	27	-	12.3966	4.35e-05	1	CCTTATCTGGG
MA0482.1	Gata4	FDPS	chr1	155308648-155308848(+)	142	152	+	12.3793	4.37e-05	1	CGTTATCTGTC
MA0035.3	Gata1	FBXO9	chr6	53051891-53052091(+)	30	40	+	12.2245	4.41e-05	1	TACTTATCTCT
MA1104.1	GATA6	IFIT1B	chr10	89377956-89378156(+)	80	92	-	11.9358	4.47e-05	1	CTCAGATAAGCAT
MA0035.3	Gata1	AGAP4	chr10	45853775-45853975(-)	24	34	-	12.2041	4.47e-05	1	TGTTTATCTCT
MA0035.3	Gata1	H3F3C	chr12	31792141-31792341(-)	26	36	-	12.1837	4.5e-05	1	CTTTTATCTGC
MA0035.3	Gata1	PGLYRP1	chr19	46022965-46023165(-)	79	89	-	12.102	4.58e-05	1	CCTTTATCTGC
MA0035.3	Gata1	GNPDA2	chr4	44726495-44726695(-)	103	113	+	12.102	4.58e-05	1	CCTTTATCTGC
MA0140.2	GATA1::TAL1	CAPS	chr19	5911607-5911807(+)	26	43	-	11.6	4.6e-05	1	CCAATCTGTAGGTTACAG
MA0035.3	Gata1	ABHD8	chr19	17310136-17310336(-)	140	150	-	12.0816	4.61e-05	1	CTTTTATCTCC
MA0036.3	GATA2	GHRL	chr3	10292847-10293047(-)	152	162	+	12.3367	4.64e-05	1	GTCTTATCTAA
MA0035.3	Gata1	BCS1L	chr2	218658664-218658864(+)	190	200	+	12.0612	4.64e-05	1	CGCTTATCTTC
MA0482.1	Gata4	ABHD8	chr19	17310136-17310336(-)	139	149	-	12.2759	4.67e-05	1	TTTTATCTCCG
MA0482.1	Gata4	ERAP2	chr5	96875839-96876039(+)	113	123	-	12.2586	4.69e-05	1	CTTTATCTGCC
MA0140.2	GATA1::TAL1	RAD51B	chr14	67819679-67819879(+)	42	59	-	11.5636	4.69e-05	1	CCAATCAGAGGCCGGCAG
MA0035.3	Gata1	DPY19L1	chr7	35038171-35038371(-)	114	124	+	12.0204	4.72e-05	1	CCCTTATCAGC
MA0035.3	Gata1	CTCF	chr16	67562307-67562507(+)	187	197	+	12.0204	4.72e-05	1	CCCTTATCAGC
MA0140.2	GATA1::TAL1	VPS26C	chr21	37267819-37268019(-)	35	52	+	11.5455	4.74e-05	1	CCAATCAGCGCTTTGCAG
MA1104.1	GATA6	SCAF11	chr12	45992020-45992220(-)	32	44	+	11.844	4.75e-05	1	AAGTGATAAGACA
MA0482.1	Gata4	LCAT	chr16	67944031-67944231(-)	76	86	-	12.2414	4.81e-05	1	CCTTATCTGGT
MA0035.3	Gata1	CENPM	chr22	41947064-41947264(-)	29	39	-	12	4.82e-05	1	CCTTTATCTCC
MA0035.3	Gata1	MAPKAPK5	chr12	111841878-111842078(+)	40	50	-	12	4.82e-05	1	CCTTTATCTCC
MA0035.3	Gata1	GNG2	chr14	51826095-51826295(+)	148	158	+	12	4.82e-05	1	TTCCTATCTGT
MA0035.3	Gata1	BAG3	chr10	119651270-119651470(+)	182	192	+	12	4.82e-05	1	CCTTTATCTCC
MA0140.2	GATA1::TAL1	FAM104A	chr17	73236653-73236853(-)	125	142	-	11.5091	4.82e-05	1	GTTATCTCTGGAGCCCAA
MA0482.1	Gata4	TOX4	chr14	21476497-21476697(+)	61	71	+	12.1897	4.87e-05	1	GCTTATCTGTA
MA0140.2	GATA1::TAL1	GAR1	chr4	109815410-109815610(+)	172	189	+	11.4909	4.87e-05	1	GTTATCTATTATTGCCAC
MA0036.3	GATA2	GRAMD2B	chr5	126360032-126360232(+)	20	30	-	12.2449	4.88e-05	1	ATCTTATCTTG
MA1104.1	GATA6	WDR74	chr11	62841709-62841909(-)	142	154	-	11.7798	4.92e-05	1	AACTGATAAGAAC
MA0482.1	Gata4	ZC3H12B	chrX	65366538-65366738(+)	179	189	-	12.1724	4.93e-05	1	CGTTATCTCTT
MA0140.2	GATA1::TAL1	TOR1AIP1	chr1	179881942-179882142(+)	123	140	-	11.4545	4.96e-05	1	CCTATCTCCCAGTACCAA
MA0140.2	GATA1::TAL1	SNCA	chr4	89838215-89838415(-)	55	72	+	11.4545	4.96e-05	1	CTAATCTTCCGAATCCAG
MA0035.3	Gata1	ST3GAL6	chr3	98732136-98732336(+)	8	18	-	11.9388	5e-05	1	TTTTTATCTTT
MA0140.2	GATA1::TAL1	RHBDD1	chr2	226835481-226835681(+)	80	97	+	11.4364	5.01e-05	1	GGTATCTGACCCTTCCAG
MA0140.2	GATA1::TAL1	PPT2	chr6	32153341-32153541(+)	45	62	-	11.4182	5.05e-05	1	GTTATCTGTGGGTGGCTC
MA1104.1	GATA6	UQCRFS1	chr19	29213441-29213641(-)	171	183	-	11.7339	5.06e-05	1	TAGAGATAACAAT
MA0482.1	Gata4	PLCG2	chr16	81738997-81739197(+)	37	47	-	12.1207	5.09e-05	1	GCTTATCACTC
MA0140.2	GATA1::TAL1	ACTL6A	chr3	179562780-179562980(+)	110	127	-	11.4	5.1e-05	1	CCAATCACTAGGGTCCAG
MA0035.3	Gata1	ALAS2	chrX	55030964-55031164(-)	58	68	+	11.9184	5.1e-05	1	GTTTTATCTCT
MA0035.3	Gata1	UTP11	chr1	38009158-38009358(+)	102	112	+	11.9184	5.1e-05	1	TCCCTATCTGT
MA0140.2	GATA1::TAL1	LAT2	chr7	74199552-74199752(+)	80	97	-	11.3818	5.15e-05	1	GTTATCTGCAGTGTCCAA
MA0140.2	GATA1::TAL1	ELOVL6	chr4	110199099-110199299(-)	157	174	-	11.3818	5.15e-05	1	TTAATCTCGTACAGACAG
MA0035.3	Gata1	COX18	chr4	73069655-73069855(-)	11	21	+	11.898	5.19e-05	1	TTCCTATCTCT
MA0035.3	Gata1	RPL23	chr17	38853743-38853943(-)	25	35	+	11.898	5.19e-05	1	TTCCTATCTCT
MA0140.2	GATA1::TAL1	STXBP2	chr19	7636781-7636981(+)	22	39	+	11.3636	5.19e-05	1	TGTATCTTGCAGGCACAG
MA0482.1	Gata4	CENPM	chr22	41947064-41947264(-)	28	38	-	12.0517	5.26e-05	1	CTTTATCTCCT
MA0482.1	Gata4	KTN1	chr14	55558972-55559172(+)	75	85	+	12.0517	5.26e-05	1	CTTTATCTCCT
MA0482.1	Gata4	BAG3	chr10	119651270-119651470(+)	183	193	+	12.0517	5.26e-05	1	CTTTATCTCCT
MA1104.1	GATA6	MAP3K2	chr2	127388365-127388565(-)	13	25	+	11.6514	5.32e-05	1	TGGTGATAAGAAC
MA0140.2	GATA1::TAL1	MLC1	chr22	50085802-50086002(-)	86	103	-	11.3091	5.34e-05	1	TTTATCTCTGCTCACCAA
MA0482.1	Gata4	KLF1	chr19	12887099-12887299(-)	31	41	+	12.0345	5.36e-05	1	CCTTATCAGAG
MA0482.1	Gata4	PRR3	chr6	30556786-30556986(+)	46	56	-	12.0345	5.36e-05	1	CCTTATCATCG
MA0035.3	Gata1	RGMB	chr5	98768550-98768750(+)	146	156	+	11.8571	5.49e-05	1	TCTTTATCTTT
MA0036.3	GATA2	EPOR	chr19	11384242-11384442(-)	48	58	+	12.0612	5.53e-05	1	CACTTATCTCT
MA0036.3	GATA2	KRTCAP2	chr1	155173375-155173575(-)	79	89	-	12.0612	5.53e-05	1	CACTTATCTCT
MA0140.2	GATA1::TAL1	ARRDC4	chr15	97960598-97960798(+)	7	24	+	11.2182	5.58e-05	1	CAAATCAGCAAGAAGCAG
MA0035.3	Gata1	SCAF11	chr12	45992020-45992220(-)	33	43	-	11.8367	5.58e-05	1	GTCTTATCACT
MA0035.3	Gata1	SLC37A3	chr7	140404333-140404533(-)	121	131	+	11.8367	5.58e-05	1	GTCTTATCACT
MA0035.3	Gata1	KNL1	chr15	40593920-40594120(+)	182	192	-	11.8367	5.58e-05	1	GCTTTATCTCT
MA0482.1	Gata4	DNTT	chr10	96304296-96304496(+)	11	21	-	11.9655	5.6e-05	1	TTTTATCTCTG
MA0482.1	Gata4	TNFSF4	chr1	173207213-173207413(-)	91	101	+	11.9655	5.6e-05	1	TTTTATCTCTG
MA0140.2	GATA1::TAL1	LGALS3BP	chr17	78980009-78980209(-)	123	140	-	11.2	5.63e-05	1	GCTATCAGTGCCAGGCTG
MA1104.1	GATA6	NUP35	chr2	183117413-183117613(+)	136	148	+	11.5505	5.69e-05	1	GAGTGATAAGATG
MA0482.1	Gata4	TNRC6A	chr16	24610109-24610309(+)	11	21	+	11.9483	5.72e-05	1	CTTTATCTGTC
MA0482.1	Gata4	APOBEC3C	chr22	39013983-39014183(+)	97	107	-	11.9483	5.72e-05	1	CTTTATCTGTC
MA0482.1	Gata4	CTCF	chr16	67562307-67562507(+)	188	198	+	11.9483	5.72e-05	1	CCTTATCAGCA
MA0036.3	GATA2	PPBP	chr4	73988097-73988297(-)	107	117	+	12	5.73e-05	1	CACTTATCTGC
MA0140.2	GATA1::TAL1	NPR2	chr9	35792054-35792254(+)	37	54	+	11.1636	5.73e-05	1	TTTATCAGGCTTCTTCAC
MA0035.3	Gata1	AP4S1	chr14	31025006-31025206(+)	155	165	-	11.7959	5.78e-05	1	TCTTTATCTAT
MA1104.1	GATA6	ACADVL	chr17	7217025-7217225(+)	17	29	+	11.5138	5.81e-05	1	CCCAGATAAGGCC
MA0036.3	GATA2	ESCO2	chr8	27771849-27772049(+)	80	90	-	11.9592	5.82e-05	1	GACTTATCTTT
MA0140.2	GATA1::TAL1	KLF1	chr19	12887099-12887299(-)	49	66	+	11.1273	5.84e-05	1	CCAATCAGCTAAGGACAG
MA0140.2	GATA1::TAL1	NSUN3	chr3	94062816-94063016(+)	68	85	+	11.1273	5.84e-05	1	AGTATCAGCCTTTACCAG
MA1104.1	GATA6	ZNF566	chr19	36489802-36490002(-)	17	29	-	11.5046	5.84e-05	1	CACAGATAAGCCG
MA0482.1	Gata4	MLC1	chr22	50085802-50086002(-)	94	104	-	11.8966	5.85e-05	1	CTTTATCTCTG
MA0140.2	GATA1::TAL1	AGER	chr6	32184224-32184424(-)	15	32	-	11.1091	5.89e-05	1	ATTATCACCCCACCCCTG
MA0140.2	GATA1::TAL1	CSKMT	chr11	62665209-62665409(+)	140	157	-	11.1091	5.89e-05	1	CCAATCTGGCTACTACAG
MA0036.3	GATA2	OGG1	chr3	9749844-9750044(+)	182	192	-	11.9184	5.91e-05	1	GACTTATCTTC
MA1104.1	GATA6	GPN2	chr1	26890197-26890397(-)	132	144	-	11.4771	5.95e-05	1	AGGAGATAACAGG
MA1104.1	GATA6	TMEM204	chr16	1528588-1528788(+)	76	88	+	11.4771	5.95e-05	1	TGCAGATAAGCCT
MA0140.2	GATA1::TAL1	ZNF652	chr17	49362373-49362573(-)	115	132	+	11.0727	5.99e-05	1	GTTATCTGGGCGGCGGAG
MA0036.3	GATA2	DCAF12	chr9	34127299-34127499(-)	31	41	-	11.898	6e-05	1	AACTTATCTGT
MA0035.3	Gata1	ADA2	chr22	17258135-17258335(-)	15	25	+	11.6939	6.04e-05	1	TGTTTATCTGC
MA0140.2	GATA1::TAL1	MAGEH1	chrX	55452005-55452205(+)	37	54	+	11.0545	6.04e-05	1	CCTATCTGCTAGCGGAAG
MA1104.1	GATA6	GCC1	chr7	127593511-127593711(-)	49	61	-	11.4495	6.05e-05	1	GTGTGATAAGAGG
MA0035.3	Gata1	ADIPOR1	chr1	202958472-202958672(-)	27	37	-	11.6735	6.07e-05	1	ACCTTATCTCA
MA0482.1	Gata4	EPB42	chr15	43221025-43221225(-)	144	154	-	11.8103	6.13e-05	1	TTTTATCTCTT
MA0037.3	GATA3	CXXC5	chr5	139647199-139647399(+)	1	8	-	11.1803	6.14e-05	1	AGATAACA
MA0037.3	GATA3	HIVEP1	chr6	12008662-12008862(+)	22	29	+	11.1803	6.14e-05	1	AGATAACA
MA0037.3	GATA3	FER	chr5	108747722-108747922(+)	57	64	+	11.1803	6.14e-05	1	AGATAACA
MA0037.3	GATA3	SLC16A5	chr17	75087627-75087827(+)	50	57	-	11.1803	6.14e-05	1	AGATAACA
MA0037.3	GATA3	GYPE	chr4	143905463-143905663(-)	60	67	+	11.1803	6.14e-05	1	AGATAACA
MA0037.3	GATA3	GYPB	chr4	144019245-144019445(-)	62	69	+	11.1803	6.14e-05	1	AGATAACA
MA0037.3	GATA3	AASDHPPT	chr11	106075401-106075601(+)	71	78	+	11.1803	6.14e-05	1	AGATAACA
MA0037.3	GATA3	ARHGAP33	chr19	35774432-35774632(+)	88	95	-	11.1803	6.14e-05	1	AGATAACA
MA0037.3	GATA3	GHRL	chr3	10292847-10293047(-)	111	118	+	11.1803	6.14e-05	1	AGATAACA
MA0037.3	GATA3	SPATS2L	chr2	200305781-200305981(+)	131	138	-	11.1803	6.14e-05	1	AGATAACA
MA0037.3	GATA3	GPN2	chr1	26890197-26890397(-)	134	141	-	11.1803	6.14e-05	1	AGATAACA
MA0037.3	GATA3	GYPA	chr4	144140686-144140886(-)	155	162	+	11.1803	6.14e-05	1	AGATAACA
MA0037.3	GATA3	SMARCA5	chr4	143513363-143513563(+)	155	162	-	11.1803	6.14e-05	1	AGATAACA
MA0037.3	GATA3	UQCRFS1	chr19	29213441-29213641(-)	173	180	-	11.1803	6.14e-05	1	AGATAACA
MA0037.3	GATA3	SLFNL1	chr1	41023137-41023337(-)	191	198	-	11.1803	6.14e-05	1	AGATAACA
MA0766.1	GATA5	CD4	chr12	6786758-6786958(+)	14	21	+	10.4727	6.14e-05	1	TGATAAGA
MA0766.1	GATA5	MAP3K2	chr2	127388365-127388565(-)	16	23	+	10.4727	6.14e-05	1	TGATAAGA
MA0766.1	GATA5	SCAF11	chr12	45992020-45992220(-)	35	42	+	10.4727	6.14e-05	1	TGATAAGA
MA0766.1	GATA5	B3GNT10	chr9	120792303-120792503(+)	43	50	-	10.4727	6.14e-05	1	TGATAAGA
MA0766.1	GATA5	GCC1	chr7	127593511-127593711(-)	51	58	-	10.4727	6.14e-05	1	TGATAAGA
MA0766.1	GATA5	CREBL2	chr12	12611727-12611927(+)	61	68	+	10.4727	6.14e-05	1	TGATAAGA
MA0766.1	GATA5	UBA5	chr3	132654346-132654546(+)	104	111	+	10.4727	6.14e-05	1	TGATAAGA
MA0766.1	GATA5	RHAG	chr6	49636784-49636984(-)	113	120	-	10.4727	6.14e-05	1	TGATAAGA
MA0766.1	GATA5	SLC37A3	chr7	140404333-140404533(-)	122	129	-	10.4727	6.14e-05	1	TGATAAGA
MA0766.1	GATA5	NUP35	chr2	183117413-183117613(+)	139	146	+	10.4727	6.14e-05	1	TGATAAGA
MA0766.1	GATA5	WDR74	chr11	62841709-62841909(-)	144	151	-	10.4727	6.14e-05	1	TGATAAGA
MA0766.1	GATA5	TNRC18	chr7	5425314-5425514(-)	155	162	-	10.4727	6.14e-05	1	TGATAAGA
MA0140.2	GATA1::TAL1	RPUSD2	chr15	40569200-40569400(+)	60	77	-	11.0182	6.15e-05	1	CGAATCAGGGAGGCCCAG
MA0140.2	GATA1::TAL1	SH3BP1	chr22	37634554-37634754(+)	162	179	-	11.0182	6.15e-05	1	GTTATCTTCAGGAGACAT
MA0140.2	GATA1::TAL1	NAF1	chr4	163166821-163167021(-)	20	37	-	11	6.21e-05	1	CATATCTTCGAAAATCAG
MA0140.2	GATA1::TAL1	KCTD13	chr16	29926935-29927135(-)	24	41	-	11	6.21e-05	1	TTTATCTGACCCGATCTG
MA0140.2	GATA1::TAL1	SOD2	chr6	159745086-159745286(-)	87	104	-	11	6.21e-05	1	AATATCTCATAGGATCAG
MA0035.3	Gata1	CLK4	chr5	178630515-178630715(-)	29	39	-	11.5918	6.25e-05	1	TGTTTATCTCC
MA1104.1	GATA6	TNRC18	chr7	5425314-5425514(-)	153	165	-	11.3945	6.26e-05	1	CAGTGATAAGATT
MA0482.1	Gata4	RPL36A	chrX	101390724-101390924(+)	55	65	-	11.7414	6.34e-05	1	CTTTATCTCTT
MA0482.1	Gata4	GYPE	chr4	143905463-143905663(-)	57	67	-	11.7414	6.34e-05	1	TGTTATCTTCC
MA0482.1	Gata4	GYPB	chr4	144019245-144019445(-)	59	69	-	11.7414	6.34e-05	1	TGTTATCTTCC
MA0482.1	Gata4	BTK	chrX	101390696-101390896(-)	108	118	+	11.7414	6.34e-05	1	CTTTATCTCTT
MA0482.1	Gata4	SMARCA5	chr4	143513363-143513563(+)	155	165	+	11.7414	6.34e-05	1	TGTTATCTTCC
MA0482.1	Gata4	GYPA	chr4	144140686-144140886(-)	152	162	-	11.7414	6.34e-05	1	TGTTATCTTCC
MA0482.1	Gata4	KNL1	chr15	40593920-40594120(+)	181	191	-	11.7414	6.34e-05	1	CTTTATCTCTT
MA0140.2	GATA1::TAL1	AKR1A1	chr1	45550443-45550643(+)	96	113	+	10.9273	6.43e-05	1	CCAATCTTGGTGTTGCAG
MA0482.1	Gata4	THG1L	chr5	157731097-157731297(+)	106	116	-	11.7241	6.43e-05	1	TTTTATCTGCT
MA0036.3	GATA2	TRMU	chr22	46330775-46330975(+)	48	58	+	11.7245	6.47e-05	1	AGCTTATCTTG
MA1104.1	GATA6	B3GNT10	chr9	120792303-120792503(+)	41	53	-	11.3303	6.53e-05	1	GTTTGATAAGAAA
MA0035.3	Gata1	EPOR	chr19	11384242-11384442(-)	48	58	+	11.449	6.54e-05	1	CACTTATCTCT
MA0035.3	Gata1	KRTCAP2	chr1	155173375-155173575(-)	79	89	-	11.449	6.54e-05	1	CACTTATCTCT
MA0036.3	GATA2	RAB11A	chr15	65725954-65726154(+)	74	84	+	11.7143	6.54e-05	1	AACTTATCTTT
MA0140.2	GATA1::TAL1	SMIM24	chr19	3480442-3480642(-)	16	33	+	10.8727	6.59e-05	1	CCAATCAGGTGGTGCCAG
MA0482.1	Gata4	GAB3	chrX	154751483-154751683(-)	56	66	+	11.6724	6.64e-05	1	GCTTATCACTG
MA0035.3	Gata1	LRRC70	chr5	62578635-62578835(+)	41	51	-	11.4082	6.64e-05	1	ATTTTATCTGT
MA0482.1	Gata4	PGLYRP1	chr19	46022965-46023165(-)	78	88	-	11.6552	6.67e-05	1	CTTTATCTGCT
MA0035.3	Gata1	MAGEH1	chrX	55452005-55452205(+)	35	45	+	11.3878	6.67e-05	1	TTCCTATCTGC
MA0035.3	Gata1	PLCG2	chr16	81738997-81739197(+)	38	48	-	11.3469	6.69e-05	1	CGCTTATCACT
MA0140.2	GATA1::TAL1	MPIG6B	chr6	31718494-31718694(+)	150	167	+	10.8364	6.71e-05	1	TTTATCAGACTCAGACAT
MA0036.3	GATA2	WDR74	chr11	62841709-62841909(-)	143	153	+	11.5918	6.76e-05	1	TTCTTATCAGT
MA0036.3	GATA2	HHAT	chr1	210328152-210328352(+)	67	77	-	11.5918	6.76e-05	1	GACTTATCTCA
MA0036.3	GATA2	YIF1B	chr19	38317173-38317373(-)	121	131	-	11.5918	6.76e-05	1	GACTTATCTCA
MA0140.2	GATA1::TAL1	TMEM216	chr11	61391587-61391787(+)	3	20	-	10.8182	6.77e-05	1	TCAATCAGGGTAAAGCAG
MA0140.2	GATA1::TAL1	SH3TC1	chr4	8181972-8182172(+)	153	170	-	10.8182	6.77e-05	1	GCTATCACAGTTCCTCAG
MA0035.3	Gata1	TNRC6A	chr16	24610109-24610309(+)	10	20	+	11.3265	6.86e-05	1	ACTTTATCTGT
MA0035.3	Gata1	TENT2	chr5	79612020-79612220(+)	17	27	-	11.3265	6.86e-05	1	ACTTTATCTGT
MA0035.3	Gata1	THEMIS	chr6	127918531-127918731(-)	104	114	-	11.3265	6.86e-05	1	ACTTTATCTGT
MA0036.3	GATA2	MAP3K2	chr2	127388365-127388565(-)	14	24	-	11.5714	6.89e-05	1	TTCTTATCACC
MA0140.2	GATA1::TAL1	PIP5K1A	chr1	151197849-151198049(+)	56	73	-	10.7636	6.94e-05	1	ATTATCTGTGCTCCAAAG
MA0035.3	Gata1	ENPP4	chr6	46129893-46130093(+)	117	127	-	11.3061	6.96e-05	1	TCCCTATCTGC
MA0035.3	Gata1	EPB42	chr15	43221025-43221225(-)	145	155	-	11.3061	6.96e-05	1	ATTTTATCTCT
MA0482.1	Gata4	LRRC70	chr5	62578635-62578835(+)	40	50	-	11.569	6.98e-05	1	TTTTATCTGTG
MA0482.1	Gata4	USP45	chr6	99521628-99521828(-)	97	107	-	11.569	6.98e-05	1	TTTTATCTGTG
MA1104.1	GATA6	GHRL	chr3	10292847-10293047(-)	108	120	+	11.211	7.02e-05	1	CAAAGATAACACA
MA0140.2	GATA1::TAL1	WDR27	chr6	169701967-169702167(-)	86	103	-	10.7273	7.06e-05	1	GCTATCTCGCGACAGCTG
MA0035.3	Gata1	LPXN	chr11	58578120-58578320(-)	167	177	+	11.2857	7.08e-05	1	TTTTTATCTGG
MA0482.1	Gata4	THEMIS	chr6	127918531-127918731(-)	103	113	-	11.5	7.13e-05	1	CTTTATCTGTG
MA0482.1	Gata4	TRAT1	chr3	108822598-108822798(+)	190	200	-	11.5	7.13e-05	1	CTTTATCTGTG
MA0482.1	Gata4	AAK1	chr2	69674249-69674449(-)	154	164	+	11.4828	7.2e-05	1	GCTTATCTGAA
MA1104.1	GATA6	TAS2R19	chr12	11022520-11022720(-)	132	144	-	11.156	7.21e-05	1	AACAGATAAAAAA
MA0140.2	GATA1::TAL1	NCK1	chr3	136862108-136862308(+)	42	59	-	10.6545	7.3e-05	1	CCAATCTGATAGGTTCAG
MA0140.2	GATA1::TAL1	CECR2	chr22	17359849-17360049(+)	179	196	-	10.6545	7.3e-05	1	CATATCACCAAGTTCCAC
MA1104.1	GATA6	SLC16A5	chr17	75087627-75087827(+)	48	60	-	11.1193	7.34e-05	1	CGGAGATAACATG
MA0035.3	Gata1	FAM13B	chr5	138051861-138052061(-)	7	17	+	11.2449	7.36e-05	1	TCTTTATCTTC
MA0035.3	Gata1	KCTD13	chr16	29926935-29927135(-)	33	43	-	11.2449	7.36e-05	1	TTTTTATCTGA
MA0035.3	Gata1	COX7C	chr5	86617804-86618004(+)	36	46	-	11.2449	7.36e-05	1	GCCTTATCAGC
MA0035.3	Gata1	PAM	chr5	102753881-102754081(+)	62	72	+	11.2449	7.36e-05	1	TCTTTATCTTC
MA0140.2	GATA1::TAL1	NAB1	chr2	190646646-190646846(+)	54	71	-	10.6182	7.42e-05	1	TGTATCTGGTTTCTACAG
MA0482.1	Gata4	IP6K2	chr3	48740253-48740453(-)	67	77	-	11.4138	7.46e-05	1	TTTTATCTGTT
MA0482.1	Gata4	TAS2R19	chr12	11022520-11022720(-)	134	144	+	11.4138	7.46e-05	1	TTTTATCTGTT
MA0482.1	Gata4	CD4	chr12	6786758-6786958(+)	11	21	-	11.3966	7.49e-05	1	TCTTATCACAA
MA0036.3	GATA2	CSPP1	chr8	67062326-67062526(+)	167	177	-	11.3469	7.5e-05	1	AACTTATCTCA
MA0036.3	GATA2	SLC37A3	chr7	140404333-140404533(-)	121	131	+	11.3367	7.54e-05	1	GTCTTATCACT
MA0036.3	GATA2	SCAF11	chr12	45992020-45992220(-)	33	43	-	11.3367	7.54e-05	1	GTCTTATCACT
MA0482.1	Gata4	TOR1AIP1	chr1	179881942-179882142(+)	131	141	-	11.3793	7.56e-05	1	TCCTATCTCCC
MA0035.3	Gata1	CTDSP1	chr2	218398156-218398356(+)	1	11	-	11.2245	7.57e-05	1	GCTTTATCTCC
MA0035.3	Gata1	RPL36A	chrX	101390724-101390924(+)	56	66	-	11.2245	7.57e-05	1	ACTTTATCTCT
MA0035.3	Gata1	KTN1	chr14	55558972-55559172(+)	74	84	+	11.2245	7.57e-05	1	GCTTTATCTCC
MA0035.3	Gata1	BTK	chrX	101390696-101390896(-)	107	117	+	11.2245	7.57e-05	1	ACTTTATCTCT
MA0035.3	Gata1	NUP35	chr2	183117413-183117613(+)	137	147	-	11.2245	7.57e-05	1	ATCTTATCACT
MA0035.3	Gata1	TNRC18	chr7	5425314-5425514(-)	154	164	+	11.2245	7.57e-05	1	ATCTTATCACT
MA0036.3	GATA2	PDE4DIP	chr1	148808081-148808281(+)	101	111	+	11.3265	7.57e-05	1	AACTTATCTGA
MA0140.2	GATA1::TAL1	FAM49A	chr2	16666231-16666431(-)	58	75	-	10.5636	7.61e-05	1	GTTATCCGATAGGACCAC
MA0140.2	GATA1::TAL1	ZNF468	chr19	52890275-52890475(-)	109	126	-	10.5636	7.61e-05	1	TTTATCACTGAGAATCAA
MA0140.2	GATA1::TAL1	TPST2	chr22	26596617-26596817(-)	10	27	+	10.5636	7.61e-05	1	TTTATCTCTAAGCTTCTG
MA0482.1	Gata4	C1orf122	chr1	37806879-37807079(+)	154	164	+	11.3621	7.62e-05	1	TCTTATCTGGA
MA0482.1	Gata4	TENT2	chr5	79612020-79612220(+)	16	26	-	11.3448	7.66e-05	1	CTTTATCTGTT
MA0036.3	GATA2	PRR3	chr6	30556786-30556986(+)	47	57	-	11.3163	7.66e-05	1	TCCTTATCATC
MA0036.3	GATA2	H2AFY	chr5	135399814-135400014(-)	114	124	-	11.3163	7.66e-05	1	TCCTTATCATC
MA1104.1	GATA6	THG1L	chr5	157731097-157731297(+)	106	118	+	11.0367	7.67e-05	1	AGCAGATAAAAAA
MA0035.3	Gata1	PEMT	chr17	17591608-17591808(-)	6	16	-	11.2041	7.67e-05	1	TCTTTATCTGG
MA0035.3	Gata1	BMP1	chr8	22164636-22164836(+)	124	134	-	11.2041	7.67e-05	1	TCCCTATCTCC
MA0035.3	Gata1	NXT2	chrX	109535681-109535881(+)	177	187	-	11.2041	7.67e-05	1	TCTTTATCTGG
MA0036.3	GATA2	RNPEPL1	chr2	240565704-240565904(+)	163	173	-	11.2959	7.74e-05	1	AGCTTATCTAG
MA0140.2	GATA1::TAL1	PRPF38B	chr1	108692223-108692423(+)	13	30	-	10.5091	7.8e-05	1	CCAATCAGAGACGCTCAG
MA0035.3	Gata1	RHAG	chr6	49636784-49636984(-)	112	122	+	11.1837	7.81e-05	1	TTCTTATCAAC
MA0482.1	Gata4	KCTD13	chr16	29926935-29927135(-)	32	42	-	11.3103	7.82e-05	1	TTTTATCTGAC
MA0482.1	Gata4	44440	chr16	30395891-30396091(-)	97	107	+	11.3103	7.82e-05	1	CCCTATCTCCC
MA0482.1	Gata4	BMP1	chr8	22164636-22164836(+)	123	133	-	11.3103	7.82e-05	1	CCCTATCTCCC
MA0482.1	Gata4	HMBOX1	chr8	28890294-28890494(+)	187	197	-	11.3103	7.82e-05	1	CCCTATCTCCC
MA0036.3	GATA2	SREK1	chr5	66139871-66140071(+)	43	53	+	11.2857	7.85e-05	1	CACTTATCTTA
MA1104.1	GATA6	GYPE	chr4	143905463-143905663(-)	57	69	+	10.9817	7.89e-05	1	GGAAGATAACAGC
MA1104.1	GATA6	GYPB	chr4	144019245-144019445(-)	59	71	+	10.9817	7.89e-05	1	GGAAGATAACAGC
MA1104.1	GATA6	GYPA	chr4	144140686-144140886(-)	152	164	+	10.9817	7.89e-05	1	GGAAGATAACAGC
MA0037.3	GATA3	GOSR1	chr17	30477262-30477462(+)	25	32	+	11.0656	7.93e-05	1	AGATAACG
MA0037.3	GATA3	ADD3	chr10	109996268-109996468(+)	29	36	-	11.0656	7.93e-05	1	AGATAACG
MA0037.3	GATA3	TTC32	chr2	19901886-19902086(-)	74	81	-	11.0656	7.93e-05	1	AGATAACG
MA0037.3	GATA3	AC040162.1	chr16	67935917-67936117(-)	89	96	-	11.0656	7.93e-05	1	AGATAACG
MA0037.3	GATA3	ZNF91	chr19	23395460-23395660(-)	97	104	-	11.0656	7.93e-05	1	AGATAACG
MA0037.3	GATA3	MS4A3	chr11	60056487-60056687(+)	123	130	+	11.0656	7.93e-05	1	AGATAACG
MA0037.3	GATA3	CALM2	chr2	47176501-47176701(-)	117	124	-	11.0656	7.93e-05	1	AGATAACG
MA0037.3	GATA3	FDPS	chr1	155308648-155308848(+)	142	149	-	11.0656	7.93e-05	1	AGATAACG
MA0037.3	GATA3	ZC3H12B	chrX	65366538-65366738(+)	182	189	+	11.0656	7.93e-05	1	AGATAACG
MA0037.3	GATA3	DCUN1D5	chr11	103092115-103092315(-)	191	198	-	11.0656	7.93e-05	1	AGATAACG
MA1104.1	GATA6	TRMU	chr22	46330775-46330975(+)	47	59	-	10.9633	7.97e-05	1	TCAAGATAAGCTT
MA0140.2	GATA1::TAL1	ALDH6A1	chr14	74084393-74084593(-)	15	32	+	10.4545	7.99e-05	1	CCAATCACTTATCCCCAG
MA0482.1	Gata4	UQCRFS1	chr19	29213441-29213641(-)	173	183	+	11.2931	8.01e-05	1	TGTTATCTCTA
MA0035.3	Gata1	PRR3	chr6	30556786-30556986(+)	47	57	-	11.1633	8.03e-05	1	TCCTTATCATC
MA0035.3	Gata1	H2AFY	chr5	135399814-135400014(-)	114	124	-	11.1633	8.03e-05	1	TCCTTATCATC
MA0035.3	Gata1	UQCRFS1	chr19	29213441-29213641(-)	172	182	+	11.1633	8.03e-05	1	TTGTTATCTCT
MA0036.3	GATA2	COX7C	chr5	86617804-86618004(+)	36	46	-	11.2245	8.05e-05	1	GCCTTATCAGC
MA1104.1	GATA6	CPOX	chr3	98593623-98593823(-)	2	14	-	10.9358	8.06e-05	1	GAGAGATAAAAGA
MA0482.1	Gata4	PAM	chr5	102753881-102754081(+)	63	73	+	11.2414	8.13e-05	1	CTTTATCTTCC
MA0035.3	Gata1	BIRC3	chr11	102317350-102317550(+)	73	83	-	11.1429	8.17e-05	1	CCCCTATCTGT
MA0035.3	Gata1	TAPBP	chr6	33314287-33314487(-)	112	122	-	11.1429	8.17e-05	1	CCCCTATCTGT
MA1104.1	GATA6	SLC37A3	chr7	140404333-140404533(-)	120	132	-	10.9083	8.19e-05	1	CAGTGATAAGACC
MA0035.3	Gata1	ZNF766	chr19	52269471-52269671(+)	5	15	-	11.1224	8.25e-05	1	CTCCTATCTCT
MA0035.3	Gata1	RPL18	chr19	48619436-48619636(-)	15	25	-	11.1224	8.25e-05	1	TCCTTATCAGG
MA0140.2	GATA1::TAL1	KRTCAP2	chr1	155173375-155173575(-)	70	87	-	10.3818	8.26e-05	1	CTTATCTCTTTAAGTCAT
MA0482.1	Gata4	FERMT2	chr14	52952335-52952535(-)	128	138	+	11.2241	8.28e-05	1	GGTTATCTGCC
MA0766.1	GATA5	CXXC5	chr5	139647199-139647399(+)	1	8	-	10.4364	8.32e-05	1	AGATAACA
MA0766.1	GATA5	HIVEP1	chr6	12008662-12008862(+)	22	29	+	10.4364	8.32e-05	1	AGATAACA
MA0766.1	GATA5	SLC16A5	chr17	75087627-75087827(+)	50	57	-	10.4364	8.32e-05	1	AGATAACA
MA0766.1	GATA5	FER	chr5	108747722-108747922(+)	57	64	+	10.4364	8.32e-05	1	AGATAACA
MA0766.1	GATA5	GYPE	chr4	143905463-143905663(-)	60	67	+	10.4364	8.32e-05	1	AGATAACA
MA0766.1	GATA5	GYPB	chr4	144019245-144019445(-)	62	69	+	10.4364	8.32e-05	1	AGATAACA
MA0766.1	GATA5	AASDHPPT	chr11	106075401-106075601(+)	71	78	+	10.4364	8.32e-05	1	AGATAACA
MA0766.1	GATA5	ARHGAP33	chr19	35774432-35774632(+)	88	95	-	10.4364	8.32e-05	1	AGATAACA
MA0766.1	GATA5	GHRL	chr3	10292847-10293047(-)	111	118	+	10.4364	8.32e-05	1	AGATAACA
MA0766.1	GATA5	SPATS2L	chr2	200305781-200305981(+)	131	138	-	10.4364	8.32e-05	1	AGATAACA
MA0766.1	GATA5	GPN2	chr1	26890197-26890397(-)	134	141	-	10.4364	8.32e-05	1	AGATAACA
MA0766.1	GATA5	GYPA	chr4	144140686-144140886(-)	155	162	+	10.4364	8.32e-05	1	AGATAACA
MA0766.1	GATA5	SMARCA5	chr4	143513363-143513563(+)	155	162	-	10.4364	8.32e-05	1	AGATAACA
MA0766.1	GATA5	UQCRFS1	chr19	29213441-29213641(-)	173	180	-	10.4364	8.32e-05	1	AGATAACA
MA0766.1	GATA5	SLFNL1	chr1	41023137-41023337(-)	191	198	-	10.4364	8.32e-05	1	AGATAACA
MA0140.2	GATA1::TAL1	LIN52	chr14	74084696-74084896(+)	182	199	-	10.3636	8.32e-05	1	CCTATCCCCAACTCGCAG
MA0140.2	GATA1::TAL1	SMARCA5	chr4	143513363-143513563(+)	156	173	+	10.3636	8.32e-05	1	GTTATCTTCCAGAGGAAG
MA0036.3	GATA2	DPY19L1	chr7	35038171-35038371(-)	114	124	+	11.1224	8.35e-05	1	CCCTTATCAGC
MA0036.3	GATA2	CTCF	chr16	67562307-67562507(+)	187	197	+	11.1224	8.35e-05	1	CCCTTATCAGC
MA0482.1	Gata4	PROCA1	chr17	28711754-28711954(-)	29	39	-	11.1897	8.37e-05	1	CTTTATCTCAG
MA0482.1	Gata4	MBNL2	chr13	97221334-97221534(+)	92	102	+	11.1897	8.37e-05	1	CTTTATCTCAG
MA0482.1	Gata4	MTUS2	chr13	28820248-28820448(+)	177	187	+	11.1897	8.37e-05	1	GTTTATCTCCC
MA0035.3	Gata1	IFT27	chr22	36776156-36776356(-)	4	14	+	11.102	8.45e-05	1	TCTTTATCTCG
MA0035.3	Gata1	PTTG2	chr4	37960335-37960535(+)	118	128	-	11.102	8.45e-05	1	TCCTTATCAAC
MA0036.3	GATA2	TNRC18	chr7	5425314-5425514(-)	154	164	+	11.0918	8.48e-05	1	ATCTTATCACT
MA0036.3	GATA2	NUP35	chr2	183117413-183117613(+)	137	147	-	11.0918	8.48e-05	1	ATCTTATCACT
MA1104.1	GATA6	ADD3	chr10	109996268-109996468(+)	27	39	-	10.8257	8.49e-05	1	GAGAGATAACGAA
MA0140.2	GATA1::TAL1	IRF3	chr19	49665775-49665975(-)	8	25	-	10.3091	8.53e-05	1	GTTATCGACCCGGCCCAG
MA0035.3	Gata1	ZC3H12B	chrX	65366538-65366738(+)	180	190	-	11.0816	8.58e-05	1	TCGTTATCTCT
MA0035.3	Gata1	ADD3	chr10	109996268-109996468(+)	28	38	+	11.0816	8.58e-05	1	TCGTTATCTCT
MA1104.1	GATA6	SMARCA5	chr4	143513363-143513563(+)	153	165	-	10.7982	8.64e-05	1	GGAAGATAACATC
MA0140.2	GATA1::TAL1	AGAP4	chr10	45853775-45853975(-)	42	59	-	10.2727	8.67e-05	1	GTTATCACGTAAGTTCAT
MA0035.3	Gata1	PROCA1	chr17	28711754-28711954(-)	30	40	-	11.0612	8.69e-05	1	TCTTTATCTCA
MA0035.3	Gata1	CREBL2	chr12	12611727-12611927(+)	59	69	-	11.0612	8.69e-05	1	TTCTTATCACA
MA0036.3	GATA2	UBA5	chr3	132654346-132654546(+)	102	112	-	11.051	8.69e-05	1	ATCTTATCACC
MA0035.3	Gata1	FKBP5	chr6	35728483-35728683(-)	18	28	-	11.0408	8.71e-05	1	CCCCTATCTCT
MA0035.3	Gata1	FAM133B	chr7	92590294-92590494(-)	43	53	-	11.0408	8.71e-05	1	CCCCTATCTCT
MA0482.1	Gata4	MAPKAPK5	chr12	111841878-111842078(+)	39	49	-	11.1034	8.72e-05	1	CTTTATCTCCA
MA0140.2	GATA1::TAL1	RHD	chr1	25272293-25272493(+)	129	146	-	10.2545	8.73e-05	1	CTTATCTCAGGCTGCAAG
MA0140.2	GATA1::TAL1	ARTN	chr1	43933220-43933420(+)	167	184	+	10.2545	8.73e-05	1	CAAATCTGCACGTACCAG
MA0036.3	GATA2	CREBL2	chr12	12611727-12611927(+)	59	69	-	11.0408	8.79e-05	1	TTCTTATCACA
MA1104.1	GATA6	H3F3C	chr12	31792141-31792341(-)	25	37	+	10.7615	8.79e-05	1	TGCAGATAAAAGA
MA0482.1	Gata4	NEXN	chr1	77888413-77888613(+)	51	61	-	11.069	8.86e-05	1	CGTTATCACCC
MA0140.2	GATA1::TAL1	HNRNPH1	chr5	179634684-179634884(-)	12	29	+	10.2182	8.87e-05	1	CAAATCTCCAAGAAACAG
MA0035.3	Gata1	PPBP	chr4	73988097-73988297(-)	107	117	+	10.9388	8.93e-05	1	CACTTATCTGC
MA0140.2	GATA1::TAL1	IRF9	chr14	24160953-24161153(+)	168	185	-	10.2	8.95e-05	1	ACTATCAGGATGCCACTG
MA0140.2	GATA1::TAL1	FASTK	chr7	151080766-151080966(-)	155	172	+	10.2	8.95e-05	1	GCTATCTAGGGGCTGCTG
MA1104.1	GATA6	RHAG	chr6	49636784-49636984(-)	111	123	-	10.7248	8.97e-05	1	TGTTGATAAGAAC
MA0140.2	GATA1::TAL1	S100A1	chr1	153627826-153628026(+)	33	50	+	10.1636	9.09e-05	1	CCAATCTGAGACACACAC
MA0035.3	Gata1	ST8SIA4	chr5	100903166-100903366(-)	53	63	+	10.8163	9.12e-05	1	CGTTTATCTCC
MA0140.2	GATA1::TAL1	FOLR2	chr11	72216501-72216701(+)	66	83	+	10.1455	9.16e-05	1	GGTATCTATAAAATCCAG
MA0140.2	GATA1::TAL1	AP3M2	chr8	42152846-42153046(+)	104	121	+	10.1455	9.16e-05	1	CCAATCAGCGGCCTTCAG
MA0036.3	GATA2	PYGO2	chr1	154963753-154963953(-)	60	70	+	10.9796	9.16e-05	1	ACCTTATCAGC
MA0035.3	Gata1	DTX4	chr11	59171330-59171530(+)	79	89	-	10.7959	9.18e-05	1	ATTTTATCTGC
MA1104.1	GATA6	DPY19L1	chr7	35038171-35038371(-)	113	125	-	10.6697	9.19e-05	1	AGCTGATAAGGGA
MA0482.1	Gata4	GHRL	chr3	10292847-10293047(-)	108	118	-	10.9828	9.2e-05	1	TGTTATCTTTG
MA0035.3	Gata1	GHRL	chr3	10292847-10293047(-)	152	162	+	10.7755	9.25e-05	1	GTCTTATCTAA
MA0036.3	GATA2	RHAG	chr6	49636784-49636984(-)	112	122	+	10.9388	9.33e-05	1	TTCTTATCAAC
MA0036.3	GATA2	LTF	chr3	46485134-46485334(-)	175	185	+	10.9388	9.33e-05	1	CCCTTATCATC
MA0035.3	Gata1	SYCE2	chr19	12919176-12919376(-)	176	186	-	10.7347	9.38e-05	1	TGCCTATCTGT
MA1104.1	GATA6	FER	chr5	108747722-108747922(+)	54	66	+	10.6239	9.4e-05	1	AAAAGATAACACC
MA0482.1	Gata4	HIST1H2AB	chr6	26033468-26033668(-)	84	94	+	10.931	9.41e-05	1	CCTTATCAGAA
MA0482.1	Gata4	H2AFY	chr5	135399814-135400014(-)	113	123	-	10.931	9.41e-05	1	CCTTATCATCA
MA0482.1	Gata4	LTF	chr3	46485134-46485334(-)	176	186	+	10.931	9.41e-05	1	CCTTATCATCA
MA1104.1	GATA6	CTCF	chr16	67562307-67562507(+)	186	198	-	10.6147	9.44e-05	1	TGCTGATAAGGGA
MA0140.2	GATA1::TAL1	TMEM101	chr17	44023846-44024046(-)	176	193	-	10.0727	9.45e-05	1	GTTATCCAACAACAGCAG
MA1104.1	GATA6	H2AFY	chr5	135399814-135400014(-)	113	125	+	10.6055	9.47e-05	1	TGATGATAAGGAA
MA0036.3	GATA2	PTTG2	chr4	37960335-37960535(+)	118	128	-	10.8878	9.48e-05	1	TCCTTATCAAC
MA0482.1	Gata4	MS4A3	chr11	60056487-60056687(+)	120	130	-	10.9138	9.48e-05	1	CGTTATCTTTG
MA0035.3	Gata1	TRIM45	chr1	117122487-117122687(-)	60	70	-	10.7143	9.49e-05	1	TTTTTATCAGT
MA1104.1	GATA6	AASDHPPT	chr11	106075401-106075601(+)	68	80	+	10.5963	9.52e-05	1	GCAAGATAACACA
MA0140.2	GATA1::TAL1	C1orf174	chr1	3900193-3900393(-)	81	98	-	10.0545	9.52e-05	1	CCAATCACAGTGCAGCAC
MA0140.2	GATA1::TAL1	ANKMY1	chr2	240569109-240569309(-)	92	109	-	10.0545	9.52e-05	1	CGAATCTGCGCCCTACAG
MA0140.2	GATA1::TAL1	MRPS9	chr2	105037883-105038083(+)	46	63	+	10.0545	9.52e-05	1	CCAATCAGCGACGAGCTG
MA0140.2	GATA1::TAL1	AKAP10	chr17	19978243-19978443(-)	106	123	+	10.0545	9.52e-05	1	CTAATCAGGGTTCTGCAT
MA0140.2	GATA1::TAL1	GLA	chrX	101407912-101408112(-)	153	170	+	10.0545	9.52e-05	1	TTAATCTTAAAAGCCCAG
MA0140.2	GATA1::TAL1	SCAMP3	chr1	155262330-155262530(-)	155	172	+	10.0364	9.6e-05	1	GGTATCACGTGGGGGCAC
MA1104.1	GATA6	DDHD1	chr14	53153182-53153382(-)	176	188	+	10.578	9.62e-05	1	GAAAGATTAGAAA
MA1104.1	GATA6	IP6K2	chr3	48740253-48740453(-)	67	79	+	10.5688	9.66e-05	1	AACAGATAAAAAG
MA0140.2	GATA1::TAL1	CREG1	chr1	167553705-167553905(-)	55	72	-	10.0182	9.67e-05	1	CCAATCAGAGCTAAGCAC
MA0140.2	GATA1::TAL1	GGT1	chr22	24583650-24583850(+)	87	104	+	10.0182	9.67e-05	1	ACTATCTGCTGCCGCCTG
MA0140.2	GATA1::TAL1	GGT1	chr22	24583650-24583850(+)	87	104	+	10.0182	9.67e-05	1	ACTATCTGCTGCCGCCTG
MA0140.2	GATA1::TAL1	SEC61A1	chr3	128051541-128051741(+)	167	184	+	10.0182	9.67e-05	1	TCTATCAAGGCTCGGCAC
MA0037.3	GATA3	ARID1A	chr1	26693136-26693336(+)	16	23	+	10.9836	9.72e-05	1	CGATAAGA
MA0037.3	GATA3	TAF2	chr8	119832763-119832963(-)	27	34	+	10.9836	9.72e-05	1	CGATAAGA
MA0037.3	GATA3	MNS1	chr15	56465037-56465237(-)	61	68	-	10.9836	9.72e-05	1	CGATAAGA
MA0037.3	GATA3	TBC1D14	chr4	6909142-6909342(+)	69	76	+	10.9836	9.72e-05	1	CGATAAGA
MA0037.3	GATA3	RFT1	chr3	53130362-53130562(-)	100	107	-	10.9836	9.72e-05	1	CGATAAGA
MA0037.3	GATA3	TMX4	chr20	8019729-8019929(-)	138	145	+	10.9836	9.72e-05	1	CGATAAGA
MA0037.3	GATA3	PPP1R15A	chr19	48872292-48872492(+)	131	138	-	10.9836	9.72e-05	1	CGATAAGA
MA0037.3	GATA3	ANKLE1	chr19	17281545-17281745(+)	134	141	-	10.9836	9.72e-05	1	CGATAAGA
MA0037.3	GATA3	CCDC189	chr16	30762610-30762810(-)	166	173	+	10.9836	9.72e-05	1	CGATAAGA
MA0037.3	GATA3	METTL2A	chr17	62423767-62423967(+)	177	184	+	10.9836	9.72e-05	1	CGATAAGA
MA0037.3	GATA3	METTL2B	chr7	128476629-128476829(+)	178	185	+	10.9836	9.72e-05	1	CGATAAGA
MA0035.3	Gata1	CLEC4E	chr12	8540863-8541063(-)	144	154	+	10.6735	9.73e-05	1	TGTTTATCTTT
MA1104.1	GATA6	FBXO9	chr6	53051891-53052091(+)	29	41	-	10.5505	9.74e-05	1	AAGAGATAAGTAC
MA0140.2	GATA1::TAL1	AL121753.1	chr20	35279943-35280143(-)	8	25	+	10	9.75e-05	1	AATATCTTTGATTGACAG
MA0482.1	Gata4	NDST1	chr5	150485718-150485918(+)	29	39	-	10.8621	9.8e-05	1	CCCTATCTCCG
MA0482.1	Gata4	ALAS2	chrX	55030964-55031164(-)	59	69	+	10.8621	9.8e-05	1	TTTTATCTCTA
MA0140.2	GATA1::TAL1	SPTA1	chr1	158686615-158686815(-)	101	118	-	9.98182	9.82e-05	1	ATTATCTTTAGAAGACAT
MA0140.2	GATA1::TAL1	WDR74	chr11	62841709-62841909(-)	135	152	+	9.98182	9.82e-05	1	AGTATCTGTTCTTATCAG
MA0140.2	GATA1::TAL1	CLEC2B	chr12	9870036-9870236(-)	5	22	-	9.96364	9.9e-05	1	TTAATCATTTCTGGGCAG
MA0140.2	GATA1::TAL1	ADIPOR1	chr1	202958472-202958672(-)	18	35	-	9.96364	9.9e-05	1	CTTATCTCATCTCCTCTG
MA0140.2	GATA1::TAL1	RPL19	chr17	39200183-39200383(+)	91	108	-	9.96364	9.9e-05	1	ATTATCTGCGAAGGGGAG
MA0140.2	GATA1::TAL1	TMEM150A	chr2	85603096-85603296(-)	31	48	+	9.96364	9.9e-05	1	AGTATCTAATGAAAGCAG
MA1104.1	GATA6	MAP7D1	chr1	36155479-36155679(+)	32	44	+	10.5138	9.9e-05	1	AGCAGATTAGAGA
MA0482.1	Gata4	FER	chr5	108747722-108747922(+)	54	64	-	10.8276	9.95e-05	1	TGTTATCTTTT
MA0035.3	Gata1	IL18R1	chr2	102311429-102311629(+)	47	57	-	10.6327	9.95e-05	1	TCTTTATCAGT
MA0035.3	Gata1	ARHGDIB	chr12	14961628-14961828(-)	122	132	-	10.6327	9.95e-05	1	TGCCTATCTCT
MA0035.3	Gata1	DIAPH2	chrX	96684563-96684763(+)	188	198	-	10.6327	9.95e-05	1	TGCCTATCTCT
MA0035.3	Gata1	PYGO2	chr1	154963753-154963953(-)	60	70	+	10.6327	9.95e-05	1	ACCTTATCAGC
MA0035.3	Gata1	ZRANB1	chr10	124942023-124942223(+)	185	195	+	10.6327	9.95e-05	1	TGCCTATCTCT
